# Supplementary material for: Differential Transcriptional Effects of EGFR Inhibitors
Source: PLoS One. 2014 Sep 3;9(9):e102466. doi: 10.1371/journal.pone.0102466 (PMC4153546; doi:10.1371/journal.pone.0102466)
Supplement: Table S2 — The 2251 genes induced by the EGFR inhibitors. (XLSX) [file pone.0102466.s002.xlsx]

## Sheet: AllUP_Table
ID	Gene Name	CYTOBAND	ENTREZ_GENE_ID	KEGG_PATHWAY	OFFICIAL_GENE_SYMBOL	OMIM_DISEASE
228264_at	1-aminocyclopropane-1-carboxylate synthase homolog (Arabidopsis)(non-functional)	11p11,	84680,		ACCS,
205552_s_at, 202869_at	2',5'-oligoadenylate synthetase 1, 40/46kDa	12q24.1,	4938,		OAS1,	Diabetes mellitus, type 1, susceptibility to,Viral infection, susceptibility to,
218400_at	2'-5'-oligoadenylate synthetase 3, 100kDa	12q24.2,	4940,		Oas3,
210797_s_at, 205660_at	2'-5'-oligoadenylate synthetase-like	12q24.2,	8638,		OASL,
203502_at	2,3-bisphosphoglycerate mutase	7q31-q34,	669,	hsa00010:Glycolysis / Gluconeogenesis,	BPGM,	Hemolytic anemia due to bisphosphoglycerate mutase deficiency,
202447_at	2,4-dienoyl CoA reductase 1, mitochondrial	8q21.3,	1666,		DECR1,
230892_at	2-deoxyribose-5-phosphate aldolase homolog (C. elegans)	12p12.3,	51071,	hsa00030:Pentose phosphate pathway,	dera,
203058_s_at, 203060_s_at	3'-phosphoadenosine 5'-phosphosulfate synthase 2	10q23-q24,	9060,	hsa00230:Purine metabolism,hsa00450:Selenoamino acid metabolism,hsa00920:Sulfur metabolism,	PAPSS2,	SEMD, Pakistani type,
205822_s_at	3-hydroxy-3-methylglutaryl-Coenzyme A synthase 1 (soluble)	5p14-p13,	3157,	hsa00072:Synthesis and degradation of ketone bodies,hsa00280:Valine, leucine and isoleucine degradation,hsa00650:Butanoate metabolism,hsa00900:Terpenoid backbone biosynthesis,	HMGCS1,
204607_at, 240110_at	3-hydroxy-3-methylglutaryl-Coenzyme A synthase 2 (mitochondrial)	1p13-p12,	3158,	hsa00072:Synthesis and degradation of ketone bodies,hsa00280:Valine, leucine and isoleucine degradation,hsa00650:Butanoate metabolism,hsa00900:Terpenoid backbone biosynthesis,hsa03320:PPAR signaling pathway,	HMGCS2,	HMG-CoA synthase-2 deficiency,
218285_s_at, 235155_at	3-hydroxybutyrate dehydrogenase, type 2	4q24,	56898,	hsa00072:Synthesis and degradation of ketone bodies,hsa00650:Butanoate metabolism,	bdh2,
224812_at, 231955_s_at, 234452_at	3-hydroxyisobutyrate dehydrogenase	7p15.2,	11112,	hsa00280:Valine, leucine and isoleucine degradation,	hibadh,
202772_at	3-hydroxymethyl-3-methylglutaryl-Coenzyme A lyase	1p36.1-p35,	3155,	hsa00072:Synthesis and degradation of ketone bodies,hsa00280:Valine, leucine and isoleucine degradation,hsa00650:Butanoate metabolism,	hmgcL,	HMG-CoA lyase deficiency,
204524_at	3-phosphoinositide dependent protein kinase-1	16p13.3,	5170,	hsa03320:PPAR signaling pathway,hsa04150:mTOR signaling pathway,hsa04510:Focal adhesion,hsa04910:Insulin signaling pathway,hsa04960:Aldosterone-regulated sodium reabsorption,hsa05213:Endometrial cancer,hsa05215:Prostate cancer,hsa05223:Non-small cell lung cancer,	PDPK1,
209459_s_at	4-aminobutyrate aminotransferase	16p13.2,	18,	hsa00250:Alanine, aspartate and glutamate metabolism,hsa00280:Valine, leucine and isoleucine degradation,hsa00410:beta-Alanine metabolism,hsa00640:Propanoate metabolism,hsa00650:Butanoate metabolism,	ABAT,	GABA-transaminase deficiency,
225814_at	5'-3' exoribonuclease 1	3q23,	54464,	hsa03018:RNA degradation,	XRN1,
236703_at, 209155_s_at	5'-nucleotidase, cytosolic II	10q24.32-q24.33,	22978,	hsa00230:Purine metabolism,hsa00240:Pyrimidine metabolism,hsa00760:Nicotinate and nicotinamide metabolism,	NT5C2,
226929_at	5,10-methylenetetrahydrofolate reductase (NADPH)	1p36.3,	4524,	hsa00670:One carbon pool by folate,hsa00680:Methane metabolism,	Mthfr,	Cleft lip/palate, susceptibility to,Homocystinuria due to MTHFR deficiency,Neural tube defects, susceptiblity to,Schizophrenia, susceptibility to,Thromboembolism, susceptibility to,Vascular disease, susceptiblity to,
226969_at	5-methyltetrahydrofolate-homocysteine methyltransferase	1q43,	4548,	hsa00270:Cysteine and methionine metabolism,hsa00670:One carbon pool by folate,	mtr,	Cleft lip/palate, susceptibility to,Down syndrome, susceptibility to,Methylcobalamin deficiency, cblG type,Neural tube defects, folate-sensitive, susceptibility to,
226733_at	6-phosphofructo-2-kinase/fructose-2,6-biphosphatase 2	1q31,	5208,	hsa00051:Fructose and mannose metabolism,	Pfkfb2,
215483_at	A kinase (PRKA) anchor protein (yotiao) 9	7q21-q22,	10142,		Akap9,	Long QT syndrome-11,
236007_at	A kinase (PRKA) anchor protein 10	17p11.1,	11216,		AKAP10,	Cardiac conduction defect, susceptibility to,Longevity, reduced,
209534_x_at, 222024_s_at, 208325_s_at	A kinase (PRKA) anchor protein 13	15q24-q25,	11214,		AKAP13,
205771_s_at	A kinase (PRKA) anchor protein 7	6q23,	9465,		AKAP7,
238054_at	ADP-ribosylhydrolase like 1	13q34,	113622,		ADPRHL1,
226665_at, 230148_at, 226334_s_at	AHA1, activator of heat shock 90kDa protein ATPase homolog 2 (yeast)	2p15,	130872,		AHSA2,
1558378_a_at	AHNAK nucleoprotein 2	14q32.33,	113146,		AHNAK2,
218373_at, 223894_s_at	AKT interacting protein; similar to AKT interacting protein	16q12.2,5p14.2,	100130746,64400,		AKTIP,LOC100130746,
206837_at	ALX homeobox 1	12q21.3-q22,	8092,		alx1,
1566990_x_at, 1566989_at, 238043_at, 1556818_at	AT rich interactive domain 1B (SWI1-like)	6q25.1,	57492,		ARID1B,
225486_at, 1553349_at	AT rich interactive domain 2 (ARID, RFX-like)	12q12,	196528,		ARID2,
205062_x_at, 230141_at	AT rich interactive domain 4A (RBP1-like)	14q23.1,	5926,		ARID4A,
221230_s_at	AT rich interactive domain 4B (RBP1-like)	1q42.1-q43,	51742,		ARID4B,
1558000_at, 212614_at, 1558001_s_at	AT rich interactive domain 5B (MRF1-like)	10q21.2,	84159,		ARID5B,
202512_s_at	ATG5 autophagy related 5 homolog (S. cerevisiae)	6q21,	9474,	hsa04140:Regulation of autophagy,hsa04622:RIG-I-like receptor signaling pathway,	atg5,
214132_at	ATP synthase, H+ transporting, mitochondrial F1 complex, gamma polypeptide 1	10p15.1,	509,	hsa00190:Oxidative phosphorylation,hsa05010:Alzheimer's disease,hsa05012:Parkinson's disease,hsa05016:Huntington's disease,	Atp5c1,
203505_at, 203504_s_at	ATP-binding cassette, sub-family A (ABC1), member 1	9q31.1,	19,	hsa02010:ABC transporters,	ABCA1,	Common variants at 30 loci contribute to polygenic dyslipidemia,Coronary artery disease in familial hypercholesterolemia, protection against,HDL deficiency, familial,HDL deficiency, type 2,high density lipoprotein deficiency, Tangier type, 1,Loci influencing lipid levels and coronary heart disease risk in 16 European population cohorts,Newly identified loci that influence lipid concentrations and…
204343_at	ATP-binding cassette, sub-family A (ABC1), member 3	16p13.3,	21,	hsa02010:ABC transporters,	ABCA3,	Surfactant metabolism dysfunction, pulmonary, 3,
226363_at	ATP-binding cassette, sub-family C (CFTR/MRP), member 5	3q27,	10057,	hsa02010:ABC transporters,	abcc5,
236205_at	ATP-binding cassette, sub-family C, member 6 pseudogene 1	16p12.3,	653190,		ABCC6P1,
214033_at, 215559_at	ATP-binding cassette, sub-family C, member 6 pseudogene 2; ATP-binding cassette, sub-family C (CFTR/MRP), member 6	16p13.1,16p13.11,	368,730013,	hsa02010:ABC transporters,	ABCC6,ABCC6P2,	Pseudoxanthoma elasticum,Pseudoxanthoma elasticum, forme fruste,
207583_at	ATP-binding cassette, sub-family D (ALD), member 2	12q11-q12,	225,	hsa02010:ABC transporters,	ABCD2,
220390_at	ATP/GTP binding protein-like 2	11p11.2,	79841,		agbl2,
219127_at	ATPase family, AAA domain containing 4	17q21.32,	79170,		PRR15L,
1557383_a_at	ATPase inhibitory factor 1		93974,		Atpif1,
205198_s_at	ATPase, Cu++ transporting, alpha polypeptide	Xq13.2-q13.3,	538,		ATP7A,	Cutis laxa, neonatal,Menkes disease,Occipital horn syndrome,
205473_at, 1554847_at	ATPase, H+ transporting, lysosomal 56/58kDa, V1 subunit B1	2p13.1,	525,	hsa00190:Oxidative phosphorylation,hsa05110:Vibrio cholerae infection,hsa05120:Epithelial cell signaling in Helicobacter pylori infection,	atp6v1b1,	Renal tubular acidosis with deafness,
201971_s_at	ATPase, H+ transporting, lysosomal 70kDa, V1 subunit A	3q13.2-q13.31,	523,	hsa00190:Oxidative phosphorylation,hsa05110:Vibrio cholerae infection,hsa05120:Epithelial cell signaling in Helicobacter pylori infection,	Atp6v1a,
214149_s_at, 201171_at	ATPase, H+ transporting, lysosomal 9kDa, V0 subunit e1	5q35.2,	8992,	hsa00190:Oxidative phosphorylation,hsa05110:Vibrio cholerae infection,hsa05120:Epithelial cell signaling in Helicobacter pylori infection,	ATP6V0E1,
207809_s_at	ATPase, H+ transporting, lysosomal accessory protein 1	Xq28,	537,	hsa00190:Oxidative phosphorylation,hsa04142:Lysosome,hsa05110:Vibrio cholerae infection,hsa05120:Epithelial cell signaling in Helicobacter pylori infection,	ATP6AP1,
228816_at	ATPase, H+ transporting, lysosomal accessory protein 1-like	5q14.2,	92270,		Atp6ap1l,
213106_at	ATPase, aminophospholipid transporter (APLT), class I, type 8A, member 1	4p14-p12,	10396,		ATP8A1,
212062_at, 216129_at	ATPase, class II, type 9A	20q13.2,	10079,		ATP9A,
205052_at	AU RNA binding protein/enoyl-Coenzyme A hydratase	9q22.31,	549,	hsa00280:Valine, leucine and isoleucine degradation,	AUH,	3-methylglutaconic aciduria, type I,MGA Type I,
202686_s_at	AXL receptor tyrosine kinase	19q13.1,	558,		AXL,
219497_s_at, 222891_s_at	B-cell CLL/lymphoma 11A (zinc finger protein)	2p16.1,	53335,		BCL11A,	A QTL influencing F cell production maps to a gene encoding a zinc-finger protein on chromosome 2p15,Fetal hemoglobin quantitative trait locus 5,Genome-wide association study shows BCL11A associated with persistent fetal hemoglobin and amelioration of the phenotype of beta-thalassemia,
203685_at	B-cell CLL/lymphoma 2	18q21.33,	596,	hsa04210:Apoptosis,hsa04510:Focal adhesion,hsa04722:Neurotrophin signaling pathway,hsa05014:Amyotrophic lateral sclerosis (ALS),hsa05200:Pathways in cancer,hsa05210:Colorectal cancer,hsa05215:Prostate cancer,hsa05222:Small cell lung cancer,	BCL2,	Leukemia/lymphoma, B-cell, 2,
228758_at, 203140_at, 215990_s_at	B-cell CLL/lymphoma 6	3q27,	604,		BCL6,	Lymphoma, B-cell,
207655_s_at	B-cell linker	10q23.2-q23.33,	29760,	hsa04662:B cell receptor signaling pathway,hsa05340:Primary immunodeficiency,	BLNK,	Hypoglobulinemia and absent B cells,
200921_s_at, 200920_s_at, 1559975_at	B-cell translocation gene 1, anti-proliferative	12q22,	694,		btg1,
1555372_at, 225606_at, 1558143_a_at	BCL2-like 11 (apoptosis facilitator)	2q13,	10018,		BCL2L11,	A genome-wide association study identifies six susceptibility loci for chronic lymphocytic leukemia,
226798_at	BCL2-like 13 (apoptosis facilitator)	22q11.1,	23786,		BCL2L13,
221478_at	BCL2/adenovirus E1B 19kDa interacting protein 3-like	8p21,	665,		BNIP3L,
231175_at	BEN domain containing 6	6p12.1,	221336,		BEND6,
235609_at	BRCA1 interacting protein C-terminal helicase 1	17q22-q24,	83990,		Brip1,	Breast cancer, early-onset,Fanconi anemia, complementation group J,
222200_s_at, 218004_at, 1559971_at	BSD domain containing 1	1p35.1,	55108,		BSDC1,
221234_s_at	BTB and CNC homology 1, basic leucine zipper transcription factor 2	6q15,	60468,		Bach2,	Follow up analysis of genome-wide association data identifies novel loci for type 1 diabetes,Meta-analysis of genome-wide association study data identifies additional type 1 diabetes risk loci,
218471_s_at	Bardet-Biedl syndrome 1	11q13.1,	582,		Bbs1,	Bardet-Biedl syndrome 1,
229603_at	Bardet-Biedl syndrome 12	4q27,	166379,		BBS12,	Bardet-Biedl syndrome 12,
223227_at	Bardet-Biedl syndrome 2	16q21,	583,		BBS2,	Bardet-Biedl syndrome 2,
212745_s_at, 212744_at	Bardet-Biedl syndrome 4	15q22.3-q23,	585,		BBS4,	Bardet-Biedl syndrome 4,
226530_at	Bcl2 modifying factor	15q14,	90427,		Bmf,
225990_at	Boc homolog (mouse)	3q13.2,	91653,		BOC,
210783_x_at, 211709_s_at, 205131_x_at	C-type lectin domain family 11, member A	19q13.3,	6320,		CLEC11A,
209732_at	C-type lectin domain family 2, member B	12p13-p12,	9976,		CLEC2B,
220132_s_at, 233500_x_at, 235522_at, 228426_at	C-type lectin domain family 2, member D	12p13,	29121,		Clec2d,
209425_at	C1q and tumor necrosis factor related protein 3; alpha-methylacyl-CoA racemase	5p13,	114899,23600,	hsa00120:Primary bile acid biosynthesis,	AMACR,C1qtnf3,	Alpha-methylacyl-CoA racemase deficiency,Bile acid synthesis defect, congenital, 4,
223571_at	C1q and tumor necrosis factor related protein 6	22q13.1,	114904,		C1QTNF6,	Meta-analysis of genome-wide association study data identifies additional type 1 diabetes risk loci,
212358_at	CAP-GLY domain containing linker protein 3	19q13.12,	25999,		CLIP3,
235427_at, 208485_x_at, 211317_s_at, 239629_at, 237367_x_at, 217654_at, 214486_x_at, 209508_x_at, 211862_x_at, 210563_x_at, 211316_x_at, 209939_x_at, 210564_x_at	CASP8 and FADD-like apoptosis regulator	2q33-q34,	8837,	hsa04210:Apoptosis,	CFLAR,
227119_at	CCR4-NOT transcription complex, subunit 6-like	4q13.3,	246175,	hsa03018:RNA degradation,	CNOT6L,
202162_s_at, 202164_s_at, 202163_s_at	CCR4-NOT transcription complex, subunit 8	5q31-q33,	9337,	hsa03018:RNA degradation,	cnot8,
208650_s_at, 266_s_at, 216379_x_at, 209772_s_at, 208651_x_at, 209771_x_at	CD24 molecule; CD24 molecule-like 4	6q21,Yq11.222,	100133941,938,		Cd24,CD24L4,	Multiple sclerosis, susceptibility to,
203799_at	CD302 molecule; lymphocyte antigen 75	2q24,2q24.2,	4065,9936,		CD302,Ly75,
213856_at	CD47 molecule	3q13.1-q13.2,	961,	hsa04512:ECM-receptor interaction,	CD47,
201925_s_at	CD55 molecule, decay accelerating factor for complement (Cromer blood group)	1q32,	1604,	hsa04610:Complement and coagulation cascades,hsa04640:Hematopoietic cell lineage,hsa05416:Viral myocarditis,	Cd55,	Blood group Cromer,
214683_s_at	CDC-like kinase 1	2q33,	1195,		clk1,
1568836_at, 210346_s_at, 228751_at, 241403_at	CDC-like kinase 4	5q35,	57396,		clk4,
208022_s_at, 221556_at, 221555_x_at	CDC14 cell division cycle 14 homolog B (S. cerevisiae)	9q22.33,	8555,	hsa04110:Cell cycle,	CDC14B,
214464_at	CDC42 binding protein kinase alpha (DMPK-like)	1q42.11,	8476,		CDC42BPA,
218740_s_at	CDK5 regulatory subunit associated protein 3	17q21.32,	80279,		CDK5RAP3,
229423_at	CHK1 checkpoint homolog (S. pombe)	11q24-q24,	1111,	hsa04110:Cell cycle,hsa04115:p53 signaling pathway,	CHEK1,
228482_at	CMT1A duplicated region transcript 4	17p12,	284040,		CDRT4,	Framingham Heart Study genome-wide association: results for pulmonary function measures,
235533_at	COX19 cytochrome c oxidase assembly homolog (S. cerevisiae)	7p22.3,	90639,		COX19,
225432_s_at	CSRP2 binding protein	20p11.23,	57325,		csrp2bp,
204055_s_at	CTAGE family, member 5 pseudogene; CTAGE family member; CTAGE family, member 4; CTAGE family, member 5	13q14.3,14q13.3,6q23.2,7q35,	100128553,220429,4253,643854,		CTAGE4,Ctage5,CTAGE9,LOC220429,
222819_at, 219080_s_at	CTP synthase II	Xp22,	56474,	hsa00240:Pyrimidine metabolism,	ctps2,
220277_at, 229774_at	CXXC finger 4	4q22-q24,	80319,	hsa04310:Wnt signaling pathway,	CXXC4,
222996_s_at, 224516_s_at, 233955_x_at	CXXC finger 5	5q31.3,	51523,		CXXC5,
227900_at, 209682_at	Cas-Br-M (murine) ecotropic retroviral transforming sequence b	3q13.11,	868,	hsa04012:ErbB signaling pathway,hsa04120:Ubiquitin mediated proteolysis,hsa04144:Endocytosis,hsa04630:Jak-STAT signaling pathway,hsa04660:T cell receptor signaling pathway,hsa04910:Insulin signaling pathway,hsa05200:Pathways in cancer,hsa05220:Chronic myeloid leukemia,	Cblb,
207980_s_at, 209357_at, 227287_at	Cbp/p300-interacting transactivator, with Glu/Asp-rich carboxy-terminal domain, 2	6q23.3,	10370,		Cited2,
213557_at	Cdc2-related kinase, arginine/serine-rich	17q12,	51755,		CDK12,
203263_s_at, 203264_s_at	Cdc42 guanine nucleotide exchange factor (GEF) 9; hypothetical protein LOC100134381	X,Xq11.1,	100134381,23229,		ARHGEF9,LOC100134381,	Hyperekplexia and epilepsy,
1558621_at, 225531_at	Cdk5 and Abl enzyme substrate 1	18q11.2,	91768,		CABLES1,	Many sequence variants affecting diversity of adult human height,
227526_at	Cdon homolog (mouse)	11q23-q24,	50937,		cdon,
219270_at	ChaC, cation transport regulator homolog 1 (E. coli)	15q15.1,	79094,		CHAC1,
209782_s_at	D site of albumin promoter (albumin D-box) binding protein	19q13.3,	1628,		dbp,
214334_x_at, 212595_s_at, 235704_at, 200794_x_at	DAZ associated protein 2	12q12,	9802,		Dazap2,
207231_at, 207232_s_at, 213186_at	DAZ interacting protein 3, zinc finger	3q13.13,	9666,		DZIP3,
226093_at	DCP1 decapping enzyme homolog B (S. cerevisiae)	12p13.33,	196513,	hsa03018:RNA degradation,	DCP1B,
244777_at	DCP2 decapping enzyme homolog (S. cerevisiae)	5q22.2,	167227,	hsa03018:RNA degradation,	dcp2,
230180_at, 213998_s_at	DEAD (Asp-Glu-Ala-Asp) box polypeptide 17	22q13.1,	10521,		DDX17,
218943_s_at	DEAD (Asp-Glu-Ala-Asp) box polypeptide 58	9p12,	23586,	hsa04622:RIG-I-like receptor signaling pathway,hsa04623:Cytosolic DNA-sensing pathway,	DDX58,
1562836_at	DEAD (Asp-Glu-Ala-Asp) box polypeptide 6	11q23.3,	1656,	hsa03018:RNA degradation,	DDX6,
218986_s_at	DEAD (Asp-Glu-Ala-Asp) box polypeptide 60	4q32.3,	55601,		Ddx60,
218198_at	DEAH (Asp-Glu-Ala-His) box polypeptide 32	10q26.2,	55760,		DHX32,
205684_s_at, 226867_at	DENN/MADD domain containing 4C	9p22.1,	55667,		DENND4C,
222958_s_at, 232278_s_at, 220295_x_at, 235545_at	DEP domain containing 1	1p31.2,	55635,		Depdc1,
212503_s_at	DIP2 disco-interacting protein 2 homolog C (Drosophila)	10p15.3,	22982,		dip2c,
235005_at	DIS3 mitotic control homolog (S. cerevisiae)-like	15q22.31,	115752,		Dis3l,
208382_s_at	DMC1 dosage suppressor of mck1 homolog, meiosis-specific homologous recombination (yeast)	22q13.1,	11144,		dmc1,
235478_at	DNA cross-link repair 1C (PSO2 homolog, S. cerevisiae)	10p13,	64421,	hsa03450:Non-homologous end-joining,hsa05340:Primary immunodeficiency,	DCLRE1C,	Omenn syndrome,Severe combined immunodeficiency, Athabascan type,
209383_at	DNA-damage-inducible transcript 3	12q13.1-q13.2,	1649,	hsa04010:MAPK signaling pathway,	DDIT3,	Myxoid liposarcoma,
202887_s_at	DNA-damage-inducible transcript 4	10pter-q26.12,	54541,	hsa04150:mTOR signaling pathway,	ddit4,
228057_at	DNA-damage-inducible transcript 4-like	4q23,	115265,		DDIT4L,
236649_at	DTW domain containing 1	15q21.2,	56986,		DTWD1,
203791_at	Dmx-like 1	5q22,	1657,		DMXL1,
202500_at	DnaJ (Hsp40) homolog, subfamily B, member 2	2q32-q34,	3300,		Dnajb2,
203810_at, 203811_s_at	DnaJ (Hsp40) homolog, subfamily B, member 4	1p31.1,	11080,		Dnajb4,
209015_s_at	DnaJ (Hsp40) homolog, subfamily B, member 6	7q36.3,	10049,		DNAJB6,
223721_s_at, 218976_at	DnaJ (Hsp40) homolog, subfamily C, member 12	10q22.1,	56521,		dnajc12,
240574_at	DnaJ (Hsp40) homolog, subfamily C, member 3	13q32.1,	5611,		DNAJC3,
223371_s_at, 206782_s_at, 228622_s_at	DnaJ (Hsp40) homolog, subfamily C, member 4	11q13,	3338,		dnajc4,
212418_at, 212420_at	E74-like factor 1 (ets domain transcription factor)	13q13,	1997,		ELF1,
210827_s_at, 201510_at, 229842_at	E74-like factor 3 (ets domain transcription factor, epithelial-specific )	1q32.2,	1999,		elf3,
233375_at, 1557674_s_at	EF-hand calcium binding domain 2	1q44,	84288,		Efcab2,
227429_at	EF-hand calcium binding domain 4A	11p15.5,	283229,		EFCAB4A,
226800_at	EF-hand calcium binding domain 7	1p31.3,	84455,		EFCAB7,
225656_at, 219833_s_at, 231026_at	EF-hand domain (C-terminal) containing 1	6p12.3,	114327,		EFHC1,	Epilepsy, juvenile absence,Myoclonic epilepsy, juvenile, 1,
239477_at	EF-hand domain family, member B	3p24.3,	151651,		EFHB,
206580_s_at, 209356_x_at	EGF-containing fibulin-like extracellular matrix protein 2	11q13.1,	30008,		EFEMP2,	Cutis laxa, autosomal recessive, type I,
218935_at	EH-domain containing 3	2p21,	30845,	hsa04144:Endocytosis,	ehd3,
242470_at	EP300 interacting inhibitor of differentiation 2B	19q13.2,	126272,		EID2B,
236314_at	EPM2A (laforin) interacting protein 1	3p22.1,	9852,		EPM2AIP1,
1553683_s_at	F-box and leucine-rich repeat protein 14	12p13.33,	144699,		FBXL14,
227641_at	F-box and leucine-rich repeat protein 16	16p13.3,	146330,		FBXL16,
214436_at	F-box and leucine-rich repeat protein 2	3p22.3,	25827,		Fbxl2,
235089_at, 232412_at, 239223_s_at	F-box and leucine-rich repeat protein 20	17q12,	84961,		Fbxl20,
231472_at	F-box protein 15	18q22.3,	201456,		fbxo15,
218432_at	F-box protein 3	11p13,	26273,		FBXO3,
241762_at, 225345_s_at, 225328_at, 225803_at	F-box protein 32	8q24.13,	114907,		FBXO32,
226970_at, 227521_at	F-box protein 33	14q21.1,	254170,		fbxo33,	Bone mineral density QTL 12,
236852_at	F-box protein 43	8q22.2,	286151,	hsa04114:Oocyte meiosis,	FBXO43,
223240_at, 1554806_a_at	F-box protein 8	4q34.1,	26269,		FBXO8,
212991_at, 1559096_x_at, 238472_at	F-box protein 9	6p12.3-p11.2,	26268,		FBXO9,
219427_at	FAT tumor suppressor homolog 4 (Drosophila)	4q28.1,	79633,		FAT4,
228220_at	FCH domain only 2	5q13.2,	115548,		FCHO2,
225163_at	FERM domain containing 4A	10p13,	55691,		Frmd4a,
239246_at	FERM, RhoGEF (ARHGEF) and pleckstrin domain protein 1 (chondrocyte-derived)	13q32.2,	10160,		FARP1,
219718_at	FGGY carbohydrate kinase domain containing	1p32.1,	55277,		fggy,
203656_at	FIG4 homolog (S. cerevisiae)	6q21,	9896,		FIG4,	Amyotrophic lateral sclerosis 11,Charcot-Marie-Tooth disease, type 4J,
231130_at	FK506 binding protein 7	2q31.2,	51661,		FKBP7,
1564383_s_at	FLJ35934 protein	17p11.2,	400579,		FLJ35934,
229914_at, 1559964_at	FLJ38717 protein	6p21.1,	401261,		FLJ38717,
228188_at, 218880_at	FOS-like antigen 2	2p23.3,	2355,		Fosl2,
230964_at	FRAS1 related extracellular matrix protein 2	13q13.3,	341640,		FREM2,	Fraser syndrome,
229007_at, 234949_at, 235535_x_at	FSHD region gene 1 family, member B; FSHD region gene 1 pseudogene; hypothetical protein LOC100134091	15,20q11.1,	100134091,283788,284802,		FRG1B,LOC100134091,LOC283788,
202489_s_at, 202488_s_at	FXYD domain containing ion transport regulator 3	19q13.11-q13.12,	5349,		fxyd3,
218204_s_at	FYVE and coiled-coil domain containing 1	3p21.31,	79443,		Fyco1,
1555407_s_at, 227811_at	FYVE, RhoGEF and PH domain containing 3		89846,	hsa04810:Regulation of actin cytoskeleton,	FGD3,
218831_s_at	Fc fragment of IgG, receptor, transporter, alpha	19q13.3,	2217,		FCGRT,
226145_s_at	Fraser syndrome 1	4q21.21,	80144,		FRAS1,	Fraser syndrome,
234192_s_at	G kinase anchoring protein 1	9q21.32,	80318,		Gkap1,
210640_s_at, 211829_s_at	G protein-coupled estrogen receptor 1	7p22.3,	2852,		GPER,
204137_at	G protein-coupled receptor 137B	1q42-q43,	7107,		GPR137B,
228770_at	G protein-coupled receptor 146	7p22.3,	115330,		GPR146,
223423_at	G protein-coupled receptor 160	3q26.2-q27,	26996,		Gpr160,
234303_s_at	G protein-coupled receptor 85	7q31,	54329,		gpr85,	Conduct disorder and ADHD: Evaluation of conduct problems as a categorical and quantitative trait in the international multicentre ADHD genetics study,
228027_at	G protein-coupled receptor associated sorting protein 2	Xq22.1,	114928,		GPRASP2,
205240_at	G-protein signaling modulator 2 (AGS3-like, C. elegans)	1p13.3,	29899,		Gpsm2,
223254_s_at	G2/M-phase specific E3 ubiquitin ligase	14q12,	55632,		G2E3,
208869_s_at, 208868_s_at, 211458_s_at	GABA(A) receptors associated protein like 3 (pseudogene); GABA(A) receptor-associated protein like 1	12p13.2,15q26.1,	23710,23766,	hsa04140:Regulation of autophagy,	GABARAPL1,GABARAPL3,
209604_s_at	GATA binding protein 3	10p15,	2625,		GATA3,	Hypoparathyroidism, sensorineural deafness, and renal dysplasia,
227321_at, 1553971_a_at	GATS, stromal antigen 3 opposite strand	7q22.1,	352954,		gats,
1569320_at	GC-rich promoter binding protein 1-like 1	1p34.1,	60313,		GPBP1L1,
211767_at	GINS complex subunit 4 (Sld5 homolog)	8p11.21,	84296,		Gins4,
215891_s_at, 212737_at, 235678_at, 33646_g_at, 35820_at, 209727_at	GM2 ganglioside activator	5q31.3-q33.1,	2760,	hsa04142:Lysosome,	gm2a,	GM2-gangliosidosis, AB variant,
219313_at	GRAM domain containing 1C	3q13.31,	54762,		gramd1c,
229114_at, 226002_at, 225998_at	GRB2-associated binding protein 1	4q31.21,	2549,	hsa04012:ErbB signaling pathway,hsa04722:Neurotrophin signaling pathway,hsa05211:Renal cell carcinoma,	gab1,
205862_at	GREB1 protein	2p25.1,	9687,		GREB1,
1557289_s_at	GTF2I repeat domain containing 2	7q11.23,	84163,		GTF2IRD2,
204867_at	GTP cyclohydrolase I feedback regulator	15q15,	2644,		GCHFR,
232024_at	GTPase, IMAP family member 2	7q36.1,	26157,		GIMAP2,
204237_at, 204235_s_at, 215913_s_at	GULP, engulfment adaptor PTB domain containing 1	2q32.3-q33,	51454,		GULP1,
218692_at	Golgi-localized protein	8q23.2,	55638,		GOLSYN,
220936_s_at, 228213_at	H2A histone family, member J	12p12,	55766,	hsa05322:Systemic lupus erythematosus,	H2afj,
211998_at	H3 histone, family 3B (H3.3B); H3 histone, family 3A pseudogene; H3 histone, family 3A; similar to H3 histone, family 3B; similar to histone H3.3B	17q25,1q41,2q31.1,4q25,4q31.1,	3020,3021,440926,644914,728914,	hsa05322:Systemic lupus erythematosus,	h3f3a,H3f3b,LOC440926,LOC644914,LOC728914,
219020_at	HCLS1 binding protein 3	2p24.1,	64342,		HS1BP3,
227471_at, 222376_at	HECT domain and ankyrin repeat containing, E3 ubiquitin protein ligase 1	6q21,	57531,		HACE1,	A genome-wide association for kidney function and endocrine-related traits in the NHLBI's Framingham Heart Study,Many sequence variants affecting diversity of adult human height,
241683_at, 242349_at, 241955_at	HECT domain containing 1	14q12,	25831,		Hectd1,
220387_s_at	HERV-H LTR-associating 3	1p31.1,	11147,		HHLA3,
211267_at	HESX homeobox 1	3p14.3,	8820,		hesx1,	Pituitary hormone deficiency, combined, HESX1-related,Septooptic dysplasia,
210253_at, 209448_at	HIV-1 Tat interactive protein 2, 30kDa	11p15.1,	10553,		htatip2,
1557167_at, 1557169_x_at	HLA complex group 11	6p21,	493812,		HCG11,
1559050_at	HLA complex group 27	6p21.33,	253018,		HCG27,
207361_at, 209102_s_at	HMG-box transcription factor 1	7q22-q31,	26959,		HBP1,
219284_at	HSPB (heat shock 27kDa) associated protein 1	3q21.1,	79663,		Hspbap1,
241036_at	Hermansky-Pudlak syndrome 3	3q24,	84343,		Hps3,	Hermansky-Pudlak syndrome 3,
231929_at	IKAROS family zinc finger 2 (Helios)	2q34,	22807,		ikzf2,
221185_s_at	IQ motif containing G	3q29,	84223,		Iqcg,
205483_s_at	ISG15 ubiquitin-like modifier	1p36.33,	9636,	hsa04622:RIG-I-like receptor signaling pathway,	ISG15,
206104_at	ISL LIM homeobox 1	5q11.2,	3670,		Isl1,
223681_s_at, 214705_at	InaD-like (Drosophila)	1p31.3,	10207,	hsa04530:Tight junction,	INADL,
239695_at, 1552611_a_at	Janus kinase 1	1p32.3-p31.3,	3716,	hsa04630:Jak-STAT signaling pathway,hsa05200:Pathways in cancer,hsa05212:Pancreatic cancer,	JAK1,
1562031_at	Janus kinase 2	9p24,	3717,	hsa04062:Chemokine signaling pathway,hsa04630:Jak-STAT signaling pathway,hsa04920:Adipocytokine signaling pathway,	Jak2,	Budd-Chiari syndrome,Genome-wide assocation defines more than 30 distinct susceptibility loci for Crohn's disease,Leukemia, acute myelogenous,Myelofibrosis, idiopathic,Myeloproliferative disorder with erythrocytosis,Polycythemia vera,Thrombocythemia, essential,
227677_at	Janus kinase 3	19p13.1,	3718,	hsa04062:Chemokine signaling pathway,hsa04630:Jak-STAT signaling pathway,hsa05340:Primary immunodeficiency,	JAK3,	SCID, autosomal recessive, T-negative/B-positive type,
205889_s_at	Janus kinase and microtubule interacting protein 2	5q32,	9832,		JAKMIP2,
226267_at	Jun dimerization protein 2	14q24.3,	122953,		JDP2,
212056_at, 212057_at	KIAA0182	16q24.1,	23199,		KIAA0182,
202650_s_at	KIAA0195	17q25.1,	9772,		KIAA0195,
201985_at	KIAA0196	8q24.13,	9897,		KIAA0196,	Spastic paraplegia-8,
38892_at, 213208_at	KIAA0240	6p21.1,	23506,		KIAA0240,
202181_at	KIAA0247	14q24.1,	9766,		kiaa0247,
1558697_a_at, 202386_s_at	KIAA0430	16p13.11,	9665,		KIAA0430,
204546_at	KIAA0513	16q24.1,	9764,		KIAA0513,
212943_at	KIAA0528	12p12.1,	9847,		KIAA0528,
212314_at	KIAA0746 protein	4p15.2,	23231,		Sel1l3,
238311_at, 212634_at	KIAA0776	6q16.1,	23376,		KIAA0776,
204568_at	KIAA0831	14q22.3,	22863,		KIAA0831,
202220_at	KIAA0907	1q22,	22889,		kiaa0907,
212359_s_at	KIAA0913	10q22.2,	23053,		KIAA0913,
214098_at, 1558293_at	KIAA1107	1p22.1,	23285,		KIAA1107,
240499_at	KIAA1128	10q23.1,	54462,		FAM190B,
223161_at, 223162_s_at	KIAA1147	7q34,	57189,		KIAA1147,
225117_at	KIAA1267	17q21.31,	284058,		KIAA1267,
221874_at, 226248_s_at	KIAA1324	1p13.3,	57535,		KIAA1324,
235301_at, 244317_at	KIAA1324-like	7q21.12,	222223,		KIAA1324L,
225327_at, 236237_at	KIAA1370	15q21.2,	56204,		kiaa1370,
235956_at, 232166_at	KIAA1377	11q22.1,	57562,		KIAA1377,
228476_at	KIAA1407	3q13.31,	57577,		KIAA1407,
231956_at	KIAA1618	17q25.3,	57714,
223600_s_at	KIAA1683	19p13.1,	80726,		KIAA1683,
226429_at, 229078_s_at	KIAA1704	13q13-q14,	55425,		kiaa1704,
228334_x_at, 231850_x_at	KIAA1712	4q34,	80817,		kiaa1712,
230898_at	Kazal-type serine peptidase inhibitor domain 1	10q24.31,	81621,		kazald1,
218486_at	Kruppel-like factor 11	2p25,	8462,		klf11,	Maturity-onset diabetes of the young, type VII,
227261_at	Kruppel-like factor 12	13q22,	11278,		Klf12,
221841_s_at	Kruppel-like factor 4 (gut)	9q31,	9314,		Klf4,
203543_s_at, 228474_s_at, 230636_s_at, 203542_s_at, 203541_s_at	Kruppel-like factor 9	9q13,	687,		KLF9,
207170_s_at	LETM1 domain containing 1	12q13.13,	25875,		LETMD1,
242722_at	LIM domain 7	13q22.2,	4008,	hsa04520:Adherens junction,	Lmo7,
222456_s_at	LIM domain and actin binding 1	12q13,	51474,		LIMA1,
241879_at	LIM domain containing preferred translocation partner in lipoma	3q28,	4026,		lpp,	Leukemia, acute myeloid,Lipoma,Newly identified genetic risk variants for celiac disease related to the immune response,
202193_at	LIM domain kinase 2	22q12.2,	3985,	hsa04360:Axon guidance,hsa04666:Fc gamma R-mediated phagocytosis,hsa04810:Regulation of actin cytoskeleton,	LIMK2,
204249_s_at	LIM domain only 2 (rhombotin-like 1)	11p13,	4005,		LMO2,	Leukemia, acute T-cell,
227155_at, 229537_at, 241922_at, 209205_s_at, 209204_at	LIM domain only 4	1p22.3,	8543,		Lmo4,	Genome-wide association scan identifies candidate polymorphisms associated with differential response to anti-TNF treatment in Rheumatoid Arthritis,
218191_s_at	LMBR1 domain containing 1	6q13,	55788,		LMBRD1,	Methylmalonic aciduria and homocystinuria, cblF type,
214109_at	LPS-responsive vesicle trafficking, beach and anchor containing	4q31.3,	987,		Lrba,
204952_at	LY6/PLAUR domain containing 3	19q13.31,	27076,		LYPD3,
227764_at	LY6/PLAUR domain containing 6	2q23.2,	130574,		lypd6,
225469_at	LYR motif containing 5	12p12.1,	144363,		LYRM5,
202020_s_at	LanC lantibiotic synthetase component C-like 1 (bacterial)	2q33-q35,	10314,		lancl1,
242006_at	Leber congenital amaurosis 5	6q14.1,	167691,		LCA5,	Leber congenital amaurosis 5,Leber congenital amaurosis V,Leber congenital amaurosis, type V,
235036_at	Lix1 homolog (mouse)-like	1q21.1,	128077,		Lix1l,
233921_s_at	MAD1 mitotic arrest deficient-like 1 (yeast)	7p22,	8379,	hsa04110:Cell cycle,	MAD1L1,	Lymphoma, somatic,Prostate cancer, somatic,
243256_at	MAP kinase interacting serine/threonine kinase 1	1p33,	8569,	hsa04010:MAPK signaling pathway,hsa04910:Insulin signaling pathway,	mknk1,
204206_at	MAX binding protein	17p13.3,	4335,		mnt,
221250_s_at	MAX dimerization protein 3	5q35.3,	83463,		Mxd3,
210778_s_at, 212347_x_at, 212346_s_at	MAX dimerization protein 4	4p16.3,	10608,		MXD4,
202364_at	MAX interactor 1	10q24-q25,	4601,		MXI1,	Genome-wide association analysis of susceptibility and clinical phenotype in multiple sclerosis,Neurofibrosarcoma,Prostate cancer, susceptibility to,
229305_at	MLF1 interacting protein	4q35.1,	79682,		MLF1IP,
242456_at	MRE11 meiotic recombination 11 homolog A (S. cerevisiae)	11q21,	4361,	hsa03440:Homologous recombination,hsa03450:Non-homologous end-joining,	mre11a,	Ataxia-telangiectasia-like disorder,
225346_at, 225341_at	MTERF domain containing 3	12q24.1,	80298,		MTERFD3,
232156_at	MU-2/AP1M2 domain containing, death-inducing	14q23.1,	55745,		mudeng,
212462_at	MYST histone acetyltransferase (monocytic leukemia) 4	10q22.2,	23522,		MYST4,
213761_at	Mdm1 nuclear protein homolog (mouse)	12q15,	56890,		Mdm1,
222161_at	N-acetylated alpha-linked acidic dipeptidase 2	11q14.3-q21,	10003,		NAALAD2,
224887_at	N-acetylglucosamine-1-phosphate transferase, gamma subunit	16p13.3,	84572,		gnptg,	Mucolipidosis III gamma,Mucolipidosis IIIC,
226041_at, 1558748_at	N-acyl phosphatidylethanolamine phospholipase D	7q22.1,	222236,		NAPEPLD,
225111_s_at	N-ethylmaleimide-sensitive factor attachment protein, beta	20p12.3-p11.21,	63908,		napB,
203964_at	N-myc (and STAT) interactor	2q23,	9111,		nmi,
205006_s_at	N-myristoyltransferase 2	10p13,	9397,		NMT2,
1553575_at	NADH-ubiquinone oxidoreductase chain 6		4541,6775063,	hsa00190:Oxidative phosphorylation,hsa05012:Parkinson's disease,	ND6,
217465_at	NCK-associated protein 1	2q32,	10787,	hsa04810:Regulation of actin cytoskeleton,	NCKAP1,
214279_s_at	NDRG family member 2	14q11.2,	57447,		Ndrg2,
221082_s_at, 224368_s_at, 217286_s_at	NDRG family member 3	20q11.21-q11.23,	57446,		NDRG3,
213375_s_at	NEDD4 binding protein 2-like 1	13q12-q13,	90634,		N4BP2L1,
221899_at, 214748_at, 1565743_at, 235547_at	NEDD4 binding protein 2-like 2	13q13.1,	10443,		N4BP2L2,
203413_at	NEL-like 2 (chicken)	12q13.11-q13.12,	4753,		nell2,
236953_s_at, 239314_at, 227040_at	NHL repeat containing 3	13q13.3,	387921,		NHLRC3,
219542_at	NIMA (never in mitosis gene a)- related kinase 11	3q22.1,	79858,		Nek11,
211080_s_at	NIMA (never in mitosis gene a)-related kinase 2	1q32.2-q41,	4751,		NEK2,
204861_s_at	NLR family, apoptosis inhibitory protein	5q13.1,	4671,	hsa04621:NOD-like receptor signaling pathway,	NAIP,
242239_at	NOL1/NOP2/Sun domain family, member 6	10p12.33,	221078,		nsun6,
238983_at	NOL1/NOP2/Sun domain family, member 7	4p14,	79730,		nsun7,
204589_at	NUAK family, SNF1-like kinase, 1	12q23.3,	9891,		NUAK1,
1568807_a_at	Nedd4 family interacting protein 2	13q31.1,	54602,		NDFIP2,
200701_at	Niemann-Pick disease, type C2	14q24.3,	10577,		npc2,	Niemann-pick disease, type C2,
242352_at, 212483_at	Nipped-B homolog (Drosophila)	5p13.2,	25836,		nipbl,	Cornelia de Lange syndrome 1,
204880_at	O-6-methylguanine-DNA methyltransferase	10q26,	4255,		mgmt,
229787_s_at, 207564_x_at, 209240_at, 212307_s_at	O-linked N-acetylglucosamine (GlcNAc) transferase (UDP-N-acetylglucosamine:polypeptide-N-acetylglucosaminyl transferase)	Xq13,	8473,	hsa00512:O-Glycan biosynthesis,	Ogt,
230032_at	O-sialoglycoprotein endopeptidase-like 1	2q32.2,	64172,		OSGEPL1,
226019_at	OMA1 homolog, zinc metallopeptidase (S. cerevisiae)	1p32.1,	115209,		OMA1,
221864_at	ORAI calcium release-activated calcium modulator 3	16p11.2,	93129,		Orai3,
228801_at	ORM1-like 1 (S. cerevisiae)	2q32,	94101,		ORMDL1,
235136_at	ORM1-like 3 (S. cerevisiae)	17q12-q21.1,	94103,		Ormdl3,	Genome-wide assocation defines more than 30 distinct susceptibility loci for Crohn's disease,
231035_s_at, 226140_s_at	OTU domain containing 1	10p12.2,	220213,		Otud1,
203117_s_at	PAN2 poly(A) specific ribonuclease subunit homolog (S. cerevisiae)	12q13.2-q13.3,	9924,		pan2,
225563_at, 239393_at	PAN3 poly(A) specific ribonuclease subunit homolog (S. cerevisiae)	13q12.2,	255967,		PAN3,
238706_at	PAP associated domain containing 4	5q14.1,	167153,		papd4,
228243_at	PAX interacting (with transcription-activation domain) protein 1	7q36,	22976,		PAXIP1,	Alzheimer disease, susceptibility to,
208690_s_at	PDZ and LIM domain 1	10q22-q26.3,	9124,		PDLIM1,
243168_at, 205380_at	PDZ domain containing 1	1q21,	5174,		Pdzk1,
1553589_a_at	PDZK1 interacting protein 1	1p33,	10158,		PDZK1IP1,
1556990_at, 217744_s_at, 222392_x_at	PERP, TP53 apoptosis effector	6q24,	64065,	hsa04115:p53 signaling pathway,	PERP,
221816_s_at	PHD finger protein 11	13q14.3,	51131,		PHF11,	Asthma,IgE levels QTL,
232279_at	PHD finger protein 15	5q31.1,	23338,		Phf15,
1554153_a_at, 1558965_at, 203278_s_at, 227090_at	PHD finger protein 21A	11p11.2,	51317,		PHF21A,
228252_at	PIF1 5'-to-3' DNA helicase homolog (S. cerevisiae)	15q22.31,	80119,		PIF1,
242455_at	POU class 3 homeobox 2	6q16,	5454,		pou3f2,	A Genome-Wide Association Study of Schizophrenia Using Brain Activation as a Quantitative Phenotype,
225579_at	PQ loop repeat containing 3	2p25.1,	130814,		PQLC3,
209018_s_at, 209019_s_at	PTEN induced putative kinase 1	1p36,	65018,	hsa05012:Parkinson's disease,	Pink1,	Parkinson disease (autosomal recessive) 6,Parkinson disease 6, early onset,
1559529_at	PTK2 protein tyrosine kinase 2	8q24-qter,	5747,	hsa04012:ErbB signaling pathway,hsa04062:Chemokine signaling pathway,hsa04360:Axon guidance,hsa04370:VEGF signaling pathway,hsa04510:Focal adhesion,hsa04670:Leukocyte transendothelial migration,hsa04810:Regulation of actin cytoskeleton,hsa05200:Pathways in cancer,hsa05222:Small cell lung cancer,	PTK2,
212841_s_at, 215959_at	PTPRF interacting protein, binding protein 2 (liprin beta 2)	11p15.4,	8495,		Ppfibp2,
228336_at	PWWP domain containing 2A	5q33.3,	114825,		PWWP2A,
203831_at	R3H domain containing 2	12q13.3,	22864,		R3HDM2,
204028_s_at, 213313_at	RAB GTPase activating protein 1	9q33.2,	23637,		RABGAP1,
213784_at	RAB, member of RAS oncogene family-like 4	22q13.1,	11020,		rabl4,
219681_s_at, 225177_at, 231830_x_at	RAB11 family interacting protein 1 (class I)	8p11.22,	80223,	hsa04144:Endocytosis,	RAB11FIP1,
228613_at	RAB11 family interacting protein 3 (class II)	16p13.3,	9727,	hsa04144:Endocytosis,	RAB11FIP3,
224482_s_at	RAB11 family interacting protein 4 (class II)	17q11.2,	84440,	hsa04144:Endocytosis,	Rab11fip4,
200864_s_at, 234998_at	RAB11A, member RAS oncogene family	15q21.3-q22.31,	8766,	hsa04144:Endocytosis,	Rab11a,
1556123_a_at	RAB11B, member RAS oncogene family	19p13.2,	9230,	hsa04144:Endocytosis,	RAB11B,
225251_at	RAB24, member RAS oncogene family	5q35.3,	53917,		RAB24,
218186_at	RAB25, member RAS oncogene family	1q22,	57111,		rab25,
50965_at, 219562_at	RAB26, member RAS oncogene family	16p13.3,	25837,		RAB26,
228708_at	RAB27B, member RAS oncogene family	18q21.2,	5874,		RAB27B,
213531_s_at, 213530_at	RAB3 GTPase activating protein subunit 1 (catalytic)	2q21.3,	22930,		Rab3gap1,	Warburg micro syndrome 1,
229072_at, 228390_at	RAB30, member RAS oncogene family	11q12-q14,	27314,		RAB30,
217762_s_at	RAB31, member RAS oncogene family	18p11.3,	11031,	hsa04144:Endocytosis,	rab31,
221014_s_at, 241388_at	RAB33B, member RAS oncogene family	4q28,	83452,		RAB33B,
228113_at	RAB37, member RAS oncogene family	17q25.1,	326624,		RAB37,
238853_at	RAB3A interacting protein (rabin3)	12q14.3,	117177,		RAB3IP,
204547_at	RAB40B, member RAS oncogene family	17q25.3,	10966,		rab40b,
227698_s_at	RAB40C, member RAS oncogene family	16p13.3,	57799,		RAB40C,	Identification of ten loci associated with height highlights new biological pathways in human growth,
201276_at	RAB5B, member RAS oncogene family	12q13,	5869,	hsa04144:Endocytosis,	rab5b,	A novel susceptibility locus for type 1 diabetes on Chr12q13 identified by a genome-wide association study,
218700_s_at	RAB7, member RAS oncogene family-like 1	1q32,	8934,		Rab7l1,
207405_s_at	RAD17 homolog (S. pombe)	5q13,	5884,		RAD17,
238656_at	RAD50 homolog (S. cerevisiae)	5q31,	10111,	hsa03440:Homologous recombination,hsa03450:Non-homologous end-joining,	rad50,	Genome-Wide Scan on Total Serum IgE Levels Identifies FCER1A as Novel Susceptibility Locus,
210255_at	RAD51-like 1 (S. cerevisiae)	14q23-q24.2,	5890,	hsa03440:Homologous recombination,	RAD51L1,
239169_at	RAD52 motif 1	17q11.2,	201299,		Rdm1,
227425_at, 205645_at	RALBP1 associated Eps domain containing 2	Xp22.2,	9185,		REPS2,
226682_at	RAR-related orphan receptor A	15q21.3,	6095,		RORA,
228806_at	RAR-related orphan receptor C	1q21,	6097,		Rorc,
1553186_x_at, 1553185_at	RAS and EF-hand domain containing	9q21.32,	158158,		Rasef,
244745_at, 227758_at	RAS-like, estrogen-regulated, growth inhibitor	12p12.3,	85004,		Rerg,
202034_x_at, 237626_at, 202033_s_at	RB1-inducible coiled-coil 1	8q11,	9821,		RB1CC1,	Breast cancer, somatic,
226272_at	RCAN family member 3	1p35.3-p33,	11123,		Rcan3,
238132_at	RCC1-like G exchanging factor-like; Williams-Beuren syndrome chromosome region 16	7q11.23,	653375,81554,		LOC653375,WBSCR16,
222605_at, 241433_at, 218344_s_at	REST corepressor 3	1q32.2-q32.3,	55758,		Rcor3,
238736_at	REV3-like, catalytic subunit of DNA polymerase zeta (yeast)	6q21,	5980,		REV3L,
223468_s_at	RGM domain family, member A	15q26.1,	56963,		rgma,
228455_at	RNA binding motif protein 15	1p13,	64783,		RBM15,	Megakaryoblastic leukemia, acute,
227866_at	RNA binding motif protein 16	6q25.1-q25.3,	22828,		rbm16,
238763_at	RNA binding motif protein 20	10q25.2,	282996,		RBM20,
225839_at	RNA binding motif protein 33	7q36.3,	155435,		RBM33,
228304_at	RNA binding motif protein 43	2q23.3,	375287,		RBM43,
227979_at, 209497_s_at	RNA binding motif protein 4B	11q13,	83759,		rbm4b,
209936_at, 201394_s_at	RNA binding motif protein 5	3p21.3,	10181,		RBM5,
228030_at	RNA binding motif protein 6	3p21.3,	10180,		RBM6,
238447_at, 235570_at	RNA binding motif, single stranded interacting protein	3p24-p23,	27303,		RBMS3,	Genome-wide association with bone mass and geometry in the Framingham Heart Study,
209487_at, 209488_s_at	RNA binding protein with multiple splicing	8p12-p11,	11030,		Rbpms,
229903_x_at, 226975_at, 226999_at	RNA-binding region (RNP1, RRM) containing 3	1p21,	55599,		RNPC3,
1556088_at	RPA interacting protein	17p13.2,	84268,		RPAIN,
237330_at, 226310_at, 226312_at	RPTOR independent companion of MTOR, complex 2	5p13.1,	253260,	hsa04150:mTOR signaling pathway,	RICTOR,
213939_s_at	RUN and FYVE domain containing 3	4q13.3,	22902,		RUFY3,
215321_at, 241703_at	RUN domain containing 3B	7q21.12,	154661,		RUNDC3B,
213555_at	RWD domain containing 2A	6q14.2,	112611,		RWDD2A,
222614_at	RWD domain containing 2B	21q22.11,	10069,		rwdd2b,
203136_at	Rab acceptor 1 (prenylated)	19q13.2,	10567,		rabac1,
209539_at	Rac/Cdc42 guanine nucleotide exchange factor (GEF) 6	Xq26.3,	9459,	hsa04810:Regulation of actin cytoskeleton,hsa05212:Pancreatic cancer,	ARHGEF6,	Mental retardation, X-linked nonspecific, type 46,
204199_at	Ral GEF with PH domain and SH3 binding motif 1	9q33.3,	9649,		RALGPS1,
227224_at, 227533_at, 220338_at	Ral GEF with PH domain and SH3 binding motif 2	1q25.2,	55103,		ralgps2,
218657_at	Rap guanine nucleotide exchange factor (GEF)-like 1	17q21.1-q21.2,	51195,		RAPGEFL1,
209684_at	Ras and Rab interactor 2	20p11.22,	54453,		RIN2,
226436_at	Ras association (RalGDS/AF-6) domain family member 4	10q11.21,	83937,		RASSF4,
1570253_a_at	Ras homolog enriched in brain like 1	12q13.12,	121268,		Rhebl1,
239843_at, 243463_s_at, 236223_s_at	Ras-like without CAAX 1	1q22,	6016,		Rit1,	Does parental expressed emotion moderate genetic effects in ADHD? An exploration using a genome wide association scan,
218088_s_at, 222514_at	Ras-related GTP binding C	1p34,	64121,		RRAGC,
221524_s_at, 221523_s_at	Ras-related GTP binding D	6q15-q16,	58528,		Rragd,
230233_at	RasGEF domain family, member 1B	4q21.21-q21.22,	153020,		RASGEF1B,	Many sequence variants affecting diversity of adult human height,
223422_s_at	Rho GTPase activating protein 24	4q21.23-q21.3,	83478,		ARHGAP24,
227911_at	Rho GTPase activating protein 28	18p11.31,	79822,		ARHGAP28,
1559706_at	Rho-guanine nucleotide exchange factor	5q13.2,	64283,		RGNEF,
212651_at	Rho-related BTB domain containing 1	10q21.2,	9886,		Rhobtb1,
240111_at, 202975_s_at, 225202_at, 216048_s_at, 202976_s_at	Rho-related BTB domain containing 3	5q15,	22836,		RHOBTB3,
209741_x_at	S-phase cyclin A-associated protein in the ER	15q24,	49855,		scaper,
203186_s_at	S100 calcium binding protein A4	1q21,	6275,		S100a4,
204351_at	S100 calcium binding protein P	4p16,	6286,		S100P,
41644_at, 226022_at, 213236_at	SAM and SH3 domain containing 1	6q24.3,	23328,		SASH1,	A Genome-Wide Association Study Identifies Protein Quantitative Trait Loci (pQTLs),
232135_at, 222831_at, 225509_at	SAP30-like	5q33.2,	79685,		SAP30L,
228105_at	SAPS domain family, member 3	11q13,	55291,		SAPS3,
241365_at, 203408_s_at, 244267_at	SATB homeobox 1	3p23,	6304,		Satb1,
235206_at	SCAN domain containing 1	20q11.1-q11.23,	51282,		Scand1,
244758_at	SCAN domain containing 3	6p22.1,	114821,		SCAND3,
228088_at, 227041_at	SEC14 and spectrin domains 1	2q31.2,	91404,		Sestd1,
209889_at	SEC31 homolog B (S. cerevisiae)	10q24.31,	25956,		SEC31B,
1552790_a_at	SEC62 homolog (S. cerevisiae)	3q26.2,	7095,		SEC62,
233406_at, 212451_at	SECIS binding protein 2-like	15q21.1,	9728,		secisbp2l,
226169_at	SET binding factor 2	11p15.4,	81846,		Sbf2,	Charcot-Marie-Tooth disease, type 4B2,Charcot-Marie-Tooth disease, type 4B2, with early-onset glaucoma,Charcot-Marie-Tooth neuropathy 4B2 (autosomal recessive, with myelin outfolding),
235339_at	SET domain, bifurcated 2	13q14,	83852,	hsa00310:Lysine degradation,	SETDB2,
200630_x_at, 210231_x_at	SET nuclear oncogene; similar to SET translocation	1p22.1,9q34,	6418,646817,		LOC646817,set,
201311_s_at, 201312_s_at	SH3 domain binding glutamic acid-rich protein like	Xq13.3,	6451,		SH3BGRL,
225354_s_at	SH3 domain binding glutamic acid-rich protein like 2	6q13-q15,	83699,		sh3bgrl2,
243582_at	SH3 domain containing ring finger 2	5q32,	153769,		sh3rf2,
204019_s_at	SH3 domain containing, Ysc84-like 1 (S. cerevisiae)	2p25.3,	26751,		sh3yl1,
224907_s_at, 218813_s_at	SH3-domain GRB2-like endophilin B2	9q34,	56904,	hsa04144:Endocytosis,	Sh3glb2,
217257_at	SH3-domain binding protein 2	4p16.3,	6452,	hsa04650:Natural killer cell mediated cytotoxicity,	Sh3bp2,	Cherubism,
218765_at, 56256_at	SID1 transmembrane family, member 2	11q23.3,	51092,		SIDT2,
229796_at	SIX homeobox 4	14q23,	51804,		Six4,
229009_at	SIX homeobox 5	19q13.32,	147912,		SIX5,	Branchiootorenal syndrome 2,
217591_at, 225227_at	SKI-like oncogene	3q26,	6498,		Skil,
214930_at	SLIT and NTRK-like family, member 5	13q31.2,	26050,		SLITRK5,
1556203_a_at	SLIT-ROBO Rho GTPase activating protein 2	1q32.1,	23380,	hsa04360:Axon guidance,	srgap2,
209794_at	SLIT-ROBO Rho GTPase activating protein 3	3p25.3,	9901,	hsa04360:Axon guidance,	SRGAP3,
231718_at, 227990_at	SLU7 splicing factor homolog (S. cerevisiae)	5q33.3,	10569,	hsa03040:Spliceosome,	slu7,
1565703_at	SMAD family member 4	18q21.1,	4089,	hsa04110:Cell cycle,hsa04310:Wnt signaling pathway,hsa04350:TGF-beta signaling pathway,hsa04520:Adherens junction,hsa05200:Pathways in cancer,hsa05210:Colorectal cancer,hsa05212:Pancreatic cancer,hsa05220:Chronic myeloid leukemia,	smad4,	Juvenile polyposis/hereditary hemorrhagic telangiectasia syndrome,Pancreatic cancer,Polyposis, juvenile intestinal,
227719_at	SMAD family member 9	13q12-q14,	4093,	hsa04350:TGF-beta signaling pathway,	SMAD9,
241745_at, 243964_at	SNF2 histone linker PHD RING helicase	6q24.3,	257218,		SHPRH,
210218_s_at	SP100 nuclear antigen	2q37.1,	6672,		Sp100,
223980_s_at	SP110 nuclear body protein	2q37.1,	3431,		SP110,	A genome-wide association study identifies six susceptibility loci for chronic lymphocytic leukemia,Hepatic venoocclusive disease with immunodeficiency,Mycobacterium tuberculosis, susceptibility to,
213721_at, 228038_at	SRY (sex determining region Y)-box 2	3q26.3-q27,	6657,		SOX2,	Microphthalmia, syndromic 3,Optic nerve hypoplasia and abnormalities of the central nervous system,
201418_s_at, 213668_s_at, 201416_at, 201417_at, 1567906_at, 213665_at	SRY (sex determining region Y)-box 4	6p22.3,	6659,		Sox4,
230836_at, 230261_at	ST8 alpha-N-acetyl-neuraminide alpha-2,8-sialyltransferase 4	5q21,	7903,		ST8SIA4,
228398_at	SUMO/sentrin specific peptidase family member 8	15q23,	123228,		senp8,
209307_at	SWAP switching B-cell complex 70kDa subunit	11p15,	23075,		SWAP70,
217707_x_at, 206544_x_at, 206542_s_at	SWI/SNF related, matrix associated, actin dependent regulator of chromatin, subfamily a, member 2	9p22.3,	6595,		smarca2,
236016_at, 229511_at	SWI/SNF related, matrix associated, actin dependent regulator of chromatin, subfamily e, member 1	17q21.2,	6605,		Smarce1,
202553_s_at, 1559979_at	SYF2 homolog, RNA splicing factor (S. cerevisiae)	1p36.11,	25949,	hsa03040:Spliceosome,	Syf2,
231618_s_at	Sad1 and UNC84 domain containing 1	7p12.3,	256979,		Sun3,
231730_at, 235516_at, 1553167_a_at, 227982_at	Sep (O-phosphoserine) tRNA:Sec (selenocysteine) tRNA synthase	4p15.2,	51091,	hsa00970:Aminoacyl-tRNA biosynthesis,	sepsecs,
208741_at, 208740_at	Sin3A-associated protein, 18kDa	13q12.11,	10284,		SAP18,
224760_at	Sp1 transcription factor	12q13.1,	6667,	hsa04350:TGF-beta signaling pathway,hsa05016:Huntington's disease,	sp1,
232322_x_at, 223103_at	StAR-related lipid transfer (START) domain containing 10	11q13,	10809,		stard10,
213103_at	StAR-related lipid transfer (START) domain containing 13	13q12-q13,	90627,		STARD13,
213820_s_at	StAR-related lipid transfer (START) domain containing 5	15q26,	80765,		STARD5,
230072_at	TBC1 domain family, member 15	12q21.1,	64786,		TBC1D15,
212796_s_at	TBC1 domain family, member 2B	15q24.3-q25.1,	23102,		TBC1D2B,
201813_s_at, 231281_at	TBC1 domain family, member 5	3p24.3,	9779,		TBC1D5,
238067_at, 219771_at	TBC1 domain family, member 8B (with GRAM domain)	Xq22.3,	54885,		TBC1D8B,
212956_at	TBC1 domain family, member 9 (with GRAM domain)	4q31.21,	23158,		TBC1D9,
212665_at	TCDD-inducible poly(ADP-ribose) polymerase	3q25.31,	25976,		TIPARP,
1566901_at, 203313_s_at	TGFB-induced factor homeobox 1	18p11.3,	7050,		Tgif1,	Holoprosencephaly-4,Hypotrichosis simplex, contiguous gene syndrome with,
228500_at	THAP domain containing 8	19q13.12,	199745,		Thap8,
230185_at	THAP domain containing 9	4q21.22,	79725,		THAP9,
223588_at	THAP domain containing, apoptosis associated protein 2	12q21.1,	83591,		Thap2,
201449_at, 1558922_at	TIA1 cytotoxic granule-associated RNA binding protein	2p13,	7072,		Tia1,
224560_at, 231579_s_at, 203167_at	TIMP metallopeptidase inhibitor 2	17q25,	7077,		timp2,
213882_at	TM2 domain containing 1	1p31.3,	83941,		TM2D1,
210314_x_at	TNFSF12-TNFSF13 readthrough transcript; tumor necrosis factor (ligand) superfamily, member 12; tumor necrosis factor (ligand) superfamily, member 13	17p13,17p13.1,	407977,8741,8742,	hsa04060:Cytokine-cytokine receptor interaction,hsa04672:Intestinal immune network for IgA production,	Tnfsf12,Tnfsf12-Tnfsf13,Tnfsf13,
205140_at	TNNI3 interacting kinase; fucose-1-phosphate guanylyltransferase	1p31.1,	51086,8790,	hsa00051:Fructose and mannose metabolism,hsa00520:Amino sugar and nucleotide sugar metabolism,	FPGT,TNNI3K,
210886_x_at, 210241_s_at	TP53 target 1 (non-protein coding)	7q21.1,	11257,		TP53TG1,
233879_at	TPTE and PTEN homologous inositol lipid phosphatase pseudogene	13q12.12,	374491,		LOC374491,
226117_at	TRAF-interacting protein with forkhead-associated domain	4q25,	92610,		TIFA,
35254_at	TRAF-type zinc finger domain containing 1	12q,	10906,		trafd1,	Genome-wide association study of 14,000 cases of seven common diseases and 3,000 shared controls,
223599_at	TRIM6-TRIM34 readthrough transcript; tripartite motif-containing 6; tripartite motif-containing 34	11p15,11p15.4,	117854,445372,53840,		TRIM34,TRIM6,TRIM6-TRIM34,
208763_s_at, 235364_at, 207001_x_at	TSC22 domain family, member 3; GRAM domain containing 4	22q13.31,Xq22.3,	1831,23151,		GRAMD4,TSC22D3,
1554501_at	TSC22 domain family, member 4	7p21-p15,	81628,		TSC22D4,
204822_at	TTK protein kinase	6q13-q21,	7272,	hsa04110:Cell cycle,	ttk,
213786_at, 200977_s_at, 200976_s_at	Tax1 (human T-cell leukemia virus type I) binding protein 1	7p15,	8887,		Tax1bp1,
229338_at	U2-associated SR140 protein	3q23,	23350,	hsa03040:Spliceosome,	SR140,
217100_s_at	UBX domain protein 7	3q29,	26043,		UBXN7,
210205_at	UDP-Gal:betaGlcNAc beta 1,3-galactosyltransferase, polypeptide 4	6p21.3,	8705,	hsa00604:Glycosphingolipid biosynthesis,	B3GALT4,	Newly identified loci that influence lipid concentrations and risk of coronary artery disease,
230418_s_at	UDP-N-acetyl-alpha-D-galactosamine:polypeptide N-acetylgalactosaminyltransferase-like 1	14q24.1,	57452,	hsa00512:O-Glycan biosynthesis,	GALNTL1,
219768_at	V-set domain containing T cell activation inhibitor 1	1p13.1,	79679,		VTCN1,
201294_s_at, 201295_s_at	WD repeat and SOCS box-containing 1	17q11.1,	26118,		WSB1,
232163_at, 220917_s_at	WD repeat domain 19	4p14,	57728,		WDR19,
224897_at, 224898_at	WD repeat domain 26	1q42.11,	80232,		WDR26,
202250_s_at	WD repeat domain 42A	1q22-q23,	50717,		DCAF8,
228295_at, 219586_at	WD repeat domain 59	16q23.1,	79726,		Wdr59,
227174_at	WD repeat domain 72	15q21.3,	256764,		Wdr72,
1554140_at, 220769_s_at, 229816_at	WD repeat domain 78	1p31.3,	79819,		WDR78,
203827_at, 213836_s_at	WD repeat domain, phosphoinositide interacting 1	17q24.2,	55062,		WIPI1,
204710_s_at, 226986_at, 202031_s_at	WD repeat domain, phosphoinositide interacting 2	7p22.1,	26100,		wipi2,
238892_at, 226668_at	WD repeat, sterile alpha motif and U-box domain containing 1	2q24.2,	151525,		WDSUB1,
205792_at	WNT1 inducible signaling pathway protein 2	20q12-q13.1,	8839,		Wisp2,
209117_at	WW domain binding protein 2	17q25,	23558,		WBP2,
217975_at	WW domain binding protein 5	Xq22.1-q22.2,	51186,		Wbp5,
205809_s_at	Wiskott-Aldrich syndrome-like	7q31.3,7q31.31,	8976,	hsa04062:Chemokine signaling pathway,hsa04520:Adherens junction,hsa04666:Fc gamma R-mediated phagocytosis,hsa04810:Regulation of actin cytoskeleton,hsa05130:Pathogenic Escherichia coli infection,	WASL,
226501_at	X-prolyl aminopeptidase (aminopeptidase P) 3, putative	22q13.31-q13.33,	63929,		Xpnpep3,
219704_at	Y box binding protein 2	17p11.2-p13.1,	51087,		YBX2,
216338_s_at	Yip1 domain family, member 3	6p21.1,	25844,		Yipf3,
206373_at	Zic family member 1 (odd-paired homolog, Drosophila)	3q24,	7545,		ZIC1,	Genome-wide association analysis of susceptibility and clinical phenotype in multiple sclerosis,
224821_at	abhydrolase domain containing 14B	3p21.1,	84836,		ABHD14B,
218581_at, 242023_at	abhydrolase domain containing 4	14q11.2,	63874,		abhd4,
214274_s_at	acetyl-Coenzyme A acyltransferase 1	3p23-p22,	30,	hsa00071:Fatty acid metabolism,hsa00280:Valine, leucine and isoleucine degradation,hsa01040:Biosynthesis of unsaturated fatty acids,hsa03320:PPAR signaling pathway,	Acaa1,	Pseudo-Zellweger syndrome,
221928_at, 49452_at, 43427_at	acetyl-Coenzyme A carboxylase beta	12q24.11,	32,	hsa00061:Fatty acid biosynthesis,hsa00620:Pyruvate metabolism,hsa00640:Propanoate metabolism,hsa04910:Insulin signaling pathway,hsa04920:Adipocytokine signaling pathway,	Acacb,
218795_at	acid phosphatase 6, lysophosphatidic	1q21,	51205,	hsa00740:Riboflavin metabolism,	acp6,
238825_at	acidic repeat containing	Xq13.1,	93953,		ACRC,
200965_s_at	actin binding LIM protein 1	10q25,	3983,	hsa04360:Axon guidance,	ABLIM1,
200974_at	actin, alpha 2, smooth muscle, aorta	10q23.3,	59,	hsa04270:Vascular smooth muscle contraction,	acta2,	Aortic aneurysm, familial thoracic 6,
202672_s_at	activating transcription factor 3	1q32.3,	467,		atf3,
216197_at	activating transcription factor 7 interacting protein	12p13.1,	55729,		ATF7IP,
1563182_at, 1552519_at	activin A receptor, type IC	2q24.1,	130399,	hsa04010:MAPK signaling pathway,hsa04144:Endocytosis,hsa04350:TGF-beta signaling pathway,hsa04520:Adherens junction,hsa05200:Pathways in cancer,hsa05210:Colorectal cancer,hsa05212:Pancreatic cancer,hsa05220:Chronic myeloid leukemia,	ACVR1C,
228416_at	activin A receptor, type IIA	2q22.3,	92,	hsa04060:Cytokine-cytokine receptor interaction,hsa04350:TGF-beta signaling pathway,	ACVR2A,
241941_at	acyl-CoA synthetase bubblegum family member 2	19p13.3,	81616,		acsbg2,
201963_at, 207275_s_at	acyl-CoA synthetase long-chain family member 1	4q34-q35,	2180,	hsa00071:Fatty acid metabolism,hsa03320:PPAR signaling pathway,hsa04920:Adipocytokine signaling pathway,	ACSL1,
205942_s_at, 210377_at	acyl-CoA synthetase medium-chain family member 3	16p13.11,	6296,	hsa00650:Butanoate metabolism,	acsm3,	?Hypertension, essential,
235805_at	acyl-CoA synthetase short-chain family member 2	20q11.22,	55902,	hsa00010:Glycolysis / Gluconeogenesis,hsa00620:Pyruvate metabolism,hsa00640:Propanoate metabolism,	ACSS2,
219616_at, 229222_at	acyl-CoA synthetase short-chain family member 3	12q21.31,	79611,	hsa00640:Propanoate metabolism,	ACSS3,
202982_s_at	acyl-CoA thioesterase 2	14q24.3,	10965,	hsa01040:Biosynthesis of unsaturated fatty acids,	ACOT2,
225663_at	acyl-Coenzyme A binding domain containing 5	10p12.1,	91452,		acbd5,
226030_at	acyl-Coenzyme A dehydrogenase, short/branched chain	10q26.13,	36,	hsa00071:Fatty acid metabolism,hsa00280:Valine, leucine and isoleucine degradation,	ACADSB,	2-methylbutyrylglycinuria,
218218_at	adaptor protein, phosphotyrosine interaction, PH domain and leucine zipper containing 2	12q24.1,	55198,		appl2,
201613_s_at	adaptor-related protein complex 1, gamma 2 subunit	14q11.2,	8906,		ap1g2,
240600_at	adaptor-related protein complex 3, beta 1 subunit	5q14.1,	8546,	hsa04142:Lysosome,	AP3B1,	Hermansky-Pudlak syndrome 2,
229359_at	additional sex combs like 2 (Drosophila)	2p24.1,	55252,		ASXL2,
201753_s_at, 201034_at, 201752_s_at, 205882_x_at	adducin 3 (gamma)	10q24.2-q24.3,	120,		ADD3,
209195_s_at	adenylate cyclase 6	12q12-q13,	112,	hsa00230:Purine metabolism,hsa04062:Chemokine signaling pathway,hsa04114:Oocyte meiosis,hsa04270:Vascular smooth muscle contraction,hsa04540:Gap junction,hsa04742:Taste transduction,hsa04912:GnRH signaling pathway,hsa04914:Progesterone-mediated oocyte maturation,hsa04916:Melanogenesis,hsa05414:Dilated cardiomyopathy,	Adcy6,
204497_at	adenylate cyclase 9	16p13.3,	115,	hsa00230:Purine metabolism,hsa04020:Calcium signaling pathway,hsa04062:Chemokine signaling pathway,hsa04114:Oocyte meiosis,hsa04270:Vascular smooth muscle contraction,hsa04540:Gap junction,hsa04912:GnRH signaling pathway,hsa04914:Progesterone-mediated oocyte maturation,hsa04916:Melanogenesis,hsa05110:Vibrio cholerae infection,hsa05414:Dilated cardiomyopathy,	ADCY9,
224151_s_at	adenylate kinase 3	9p24.1-p24.3,	50808,	hsa00240:Pyrimidine metabolism,	ak3,
1553734_at	adenylate kinase 7	14q32.2,	122481,	hsa00230:Purine metabolism,	ak7,
1564002_a_at	adenylate kinase domain containing 1	6q21,	221264,		Akd1,
226325_at	adenylosuccinate synthase like 1	14q32.33,	122622,	hsa00230:Purine metabolism,hsa00250:Alanine, aspartate and glutamate metabolism,	adssl1,
202912_at	adrenomedullin	11p15.4,	133,		ADM,
205539_at, 1568706_s_at, 210507_s_at	advillin	12q14.1,	10677,		AVIL,
222472_at	aftiphilin	2p14,	54812,		AFTPH,
227113_at	alcohol dehydrogenase, iron containing, 1	8q13.1,	137872,		adhfe1,
212224_at	aldehyde dehydrogenase 1 family, member A1	9q21.13,	216,	hsa00830:Retinol metabolism,	aldh1a1,
203180_at	aldehyde dehydrogenase 1 family, member A3	15q26.3,	220,	hsa00010:Glycolysis / Gluconeogenesis,hsa00340:Histidine metabolism,hsa00350:Tyrosine metabolism,hsa00360:Phenylalanine metabolism,hsa00980:Metabolism of xenobiotics by cytochrome P450,hsa00982:Drug metabolism,	ALDH1A3,
231202_at	aldehyde dehydrogenase 1 family, member L2	12q23.3,	160428,		Aldh1l2,
201425_at	aldehyde dehydrogenase 2 family (mitochondrial)	12q24.2,	217,	hsa00010:Glycolysis / Gluconeogenesis,hsa00053:Ascorbate and aldarate metabolism,hsa00071:Fatty acid metabolism,hsa00280:Valine, leucine and isoleucine degradation,hsa00310:Lysine degradation,hsa00330:Arginine and proline metabolism,hsa00340:Histidine metabolism,hsa00380:Tryptophan metabolism,hsa00410:beta-Alanine metabolism,hsa00561:Glycerolipid metabolism,hsa00620:Pyruvate metabolism,hsa00640:P…	ALDH2,	?Fetal alcohol syndrome,Alcohol intolerance, acute,Alcohol sensitivity, acute,Hangover, susceptibility to,Sublingual nitroglycerin, susceptibility to poor response to,
202053_s_at, 210544_s_at, 202054_s_at	aldehyde dehydrogenase 3 family, member A2	17p11.2,	224,	hsa00010:Glycolysis / Gluconeogenesis,hsa00053:Ascorbate and aldarate metabolism,hsa00071:Fatty acid metabolism,hsa00280:Valine, leucine and isoleucine degradation,hsa00310:Lysine degradation,hsa00330:Arginine and proline metabolism,hsa00340:Histidine metabolism,hsa00380:Tryptophan metabolism,hsa00410:beta-Alanine metabolism,hsa00561:Glycerolipid metabolism,hsa00620:Pyruvate metabolism,hsa00640:P…	aldh3a2,	Sjogren-Larsson syndrome,
205640_at	aldehyde dehydrogenase 3 family, member B1	11q13,	221,	hsa00010:Glycolysis / Gluconeogenesis,hsa00340:Histidine metabolism,hsa00350:Tyrosine metabolism,hsa00360:Phenylalanine metabolism,hsa00980:Metabolism of xenobiotics by cytochrome P450,hsa00982:Drug metabolism,	Aldh3b1,
205623_at	aldehyde dehydrogenase 3 family, memberA1	17p11.2,	218,	hsa00010:Glycolysis / Gluconeogenesis,hsa00340:Histidine metabolism,hsa00350:Tyrosine metabolism,hsa00360:Phenylalanine metabolism,hsa00980:Metabolism of xenobiotics by cytochrome P450,hsa00982:Drug metabolism,	ALDH3A1,
221589_s_at, 221588_x_at, 204290_s_at	aldehyde dehydrogenase 6 family, member A1	14q24.3,	4329,	hsa00280:Valine, leucine and isoleucine degradation,hsa00562:Inositol phosphate metabolism,hsa00640:Propanoate metabolism,	Aldh6a1,	Methylmalonate semialdehyde dehydrogenase deficiency,
205083_at, 205082_s_at	aldehyde oxidase 1	2q33,	316,	hsa00280:Valine, leucine and isoleucine degradation,hsa00350:Tyrosine metabolism,hsa00380:Tryptophan metabolism,hsa00750:Vitamin B6 metabolism,hsa00760:Nicotinate and nicotinamide metabolism,hsa00982:Drug metabolism,	AOX1,
217626_at	aldo-keto reductase family 1, member C1 (dihydrodiol dehydrogenase 1; 20-alpha (3-alpha)-hydroxysteroid dehydrogenase)	10p15-p14,	1645,	hsa00140:Steroid hormone biosynthesis,hsa00980:Metabolism of xenobiotics by cytochrome P450,	Akr1c1,
209160_at	aldo-keto reductase family 1, member C3 (3-alpha hydroxysteroid dehydrogenase, type II)	10p15-p14,	8644,	hsa00140:Steroid hormone biosynthesis,hsa00590:Arachidonic acid metabolism,hsa00980:Metabolism of xenobiotics by cytochrome P450,	akr1c3,
202139_at	aldo-keto reductase family 7, member A2 (aflatoxin aldehyde reductase)	1p36.13,	8574,		AKR7A2,
223318_s_at, 227878_s_at	alkB, alkylation repair homolog 7 (E. coli)	19p13.3,	84266,		Alkbh7,
204664_at	alkaline phosphatase, placental (Regan isozyme)	2q37,	250,	hsa00790:Folate biosynthesis,	ALPP,
208861_s_at, 236778_at	alpha thalassemia/mental retardation syndrome X-linked (RAD54 homolog, S. cerevisiae)	Xq13.1-q21.1,	546,		Atrx,	Alpha-thalassemia myelodysplasia syndrome, somatic,Alpha-thalassemia/mental retardation syndrome,Chudley-Lowry syndrome,Juberg-Marsidi syndrome,Mental retardation-hypotonic facies syndrome, X-linked,Smith-Fineman-Myers syndrome,Sutherland-Haan syndrome-like,
227438_at, 243352_at	alpha-kinase 1	4q25,	80216,		ALPK1,
229596_at	amidohydrolase domain containing 1	12q23.1,	144193,	hsa00340:Histidine metabolism,	amdhd1,
218487_at, 218489_s_at	aminolevulinate, delta-, dehydratase	9q33.1,	210,	hsa00860:Porphyrin and chlorophyll metabolism,	Alad,	Lead poisoning, susceptibility to,Porphyria, acute hepatic,
204294_at	aminomethyltransferase	3p21.2-p21.1,	275,	hsa00260:Glycine, serine and threonine metabolism,hsa00670:One carbon pool by folate,hsa00910:Nitrogen metabolism,	amt,	Glycine encephalopathy,
218822_s_at, 218821_at	aminopeptidase-like 1	20q13.32,	79716,		npepl1,
208498_s_at	amylase, alpha 1A (salivary); amylase, alpha 1B (salivary); amylase, alpha 1C (salivary)	1p21,	276,277,278,	hsa00500:Starch and sucrose metabolism,	Amy1a,AMY1B,AMY1C,
228023_x_at	amylase, alpha 2B (pancreatic)	1p21,	280,	hsa00500:Starch and sucrose metabolism,	AMY2B,
204650_s_at	amyloid beta (A4) precursor protein-binding, family B, member 3	5q31,	10307,		APBB3,
228520_s_at	amyloid beta (A4) precursor-like protein 2	11q23-q25,11q23-q25|11q24,	334,		aplp2,
202630_at	amyloid beta precursor protein (cytoplasmic tail) binding protein 2	17q21-q23,	10513,		APPBP2,
219834_at	amyotrophic lateral sclerosis 2 (juvenile) chromosome region, candidate 8	2q33.1-q33.2,	79800,		ALS2CR8,
230588_s_at	anaphase promoting complex subunit 1 pseudogene	2p11.2,	285074,		LOC285074,
235926_at	anaphase promoting complex subunit 5	12q24.31,	51433,	hsa04110:Cell cycle,hsa04114:Oocyte meiosis,hsa04120:Ubiquitin mediated proteolysis,hsa04914:Progesterone-mediated oocyte maturation,	ANAPC5,
221825_at	angel homolog 2 (Drosophila)	1q32.3,	90806,		ANGEL2,
222661_at, 218534_s_at	angiogenic factor with G patch and FHA domains 1	5q13.3,	55109,		AGGF1,	Klippel-Trenaunay syndrome,
205141_at	angiogenin, ribonuclease, RNase A family, 5	14q11.1-q11.2,	283,		Ang,	Amyotrophic lateral sclerosis 9,Amyotrophic lateral sclerosis, susceptibility to,
238135_at	angiotensin II receptor-associated protein	1p36.22,	57085,		Agtrap,
206385_s_at, 207950_s_at, 209442_x_at	ankyrin 3, node of Ranvier (ankyrin G)	10q21,	288,		ANK3,	Collaborative genome-wide association analysis supports a role for ANK3 and CACNA1C in bipolar disorder,
226442_at, 229164_s_at	ankyrin repeat and BTB (POZ) domain containing 1	3q21,	80325,		ABTB1,
218841_at, 226861_at	ankyrin repeat and SOCS box-containing 8	12q13.11,	140461,		ASB8,
229497_at	ankyrin repeat and death domain containing 1A	15q22.31,	348094,		ANKDD1A,
218274_s_at	ankyrin repeat and zinc finger domain containing 1	2q35,	55139,		Ankzf1,
226663_at, 235008_at	ankyrin repeat domain 10	13q34,	55608,		ANKRD10,
212289_at	ankyrin repeat domain 12	18p11.22,	23253,		ANKRD12,
224810_s_at, 238851_at	ankyrin repeat domain 13A	12q24.11,	88455,		ANKRD13A,
244297_at	ankyrin repeat domain 18A	9p13.1,	253650,		ANKRD18A,
238332_at	ankyrin repeat domain 29	18q11.2,	147463,		ankrd29,
232600_at	ankyrin repeat domain 42	11q14.1,	338699,		Ankrd42,
218769_s_at	ankyrin repeat, family A (RFXANK-like), 2	5q12-q13,	57763,		ANKRA2,
209369_at	annexin A3	4q13-q22,	306,		anxa3,
211712_s_at	annexin A9	1q21,	8416,		ANXA9,
236420_s_at	anoctamin 4	12q23.1-q23.2,	121601,		ANO4,
221031_s_at	apolipoprotein L domain containing 1	12p13.1,	81575,		APOLD1,
204859_s_at, 211554_s_at	apoptotic peptidase activating factor 1	12q23,	317,	hsa04115:p53 signaling pathway,hsa04210:Apoptosis,hsa05010:Alzheimer's disease,hsa05012:Parkinson's disease,hsa05014:Amyotrophic lateral sclerosis (ALS),hsa05016:Huntington's disease,hsa05222:Small cell lung cancer,	Apaf1,
1554393_a_at, 228000_at	arginine decarboxylase	1p33-p34.3,	113451,	hsa00330:Arginine and proline metabolism,	adc,
200940_s_at	arginine-glutamic acid dipeptide (RE) repeats	1p36.2-p36.1,	473,		RERE,
207076_s_at	argininosuccinate synthetase 1	9q34.1,	445,	hsa00250:Alanine, aspartate and glutamate metabolism,hsa00330:Arginine and proline metabolism,	ASS1,	Citrullinemia,
218694_at	armadillo repeat containing, X-linked 1	Xq21.33-q22.2,	51309,		Armcx1,
227444_at	armadillo repeat containing, X-linked 4	Xq22.1,	158947,
224797_at	arrestin domain containing 3	5q14.3,	57561,		arrdc3,
230619_at	aryl hydrocarbon receptor nuclear translocator	1q21,	405,	hsa05200:Pathways in cancer,hsa05211:Renal cell carcinoma,	ARNT,	Leukemia, acute myeloblastic,
229354_at	aryl-hydrocarbon receptor repressor; programmed cell death 6	5p15.3,5p15.33,	10016,57491,		AHRR,pdcd6,
239002_at, 232238_at, 219918_s_at	asp (abnormal spindle) homolog, microcephaly associated (Drosophila)	1q31,	259266,		ASPM,	Microcephaly, primary autosomal recessive, 5,Microcephaly, primary autosomal recessive, 5, with or without simplified gyral pattern,
205047_s_at	asparagine synthetase	7q21.3,	440,	hsa00250:Alanine, aspartate and glutamate metabolism,hsa00910:Nitrogen metabolism,	asnS,
203231_s_at	ataxin 1	6p23,	6310,		ATXN1,	Spinocerebellar ataxia-1,
235240_at, 238723_at	ataxin 3	14q24.3-q32.2,	4287,		ATXN3,	Identification of ten loci associated with height highlights new biological pathways in human growth,Machado-Joseph disease,Many sequence variants affecting diversity of adult human height,
227732_at	ataxin 7-like 1	7q22.2,	222255,		Atxn7l1,
223340_at	atlastin GTPase 1	14q22.1,	51062,		ATL1,	Spastic paraplegia-3A,
210538_s_at	baculoviral IAP repeat-containing 3	11q22,	330,	hsa04120:Ubiquitin mediated proteolysis,hsa04210:Apoptosis,hsa04510:Focal adhesion,hsa04621:NOD-like receptor signaling pathway,hsa05200:Pathways in cancer,hsa05222:Small cell lung cancer,	BIRC3,
213709_at	basic helix-loop-helix domain containing, class B, 9	Xq23,	80823,		BHLHB9,
201169_s_at, 201170_s_at	basic helix-loop-helix family, member e40	3p26,	8553,	hsa04710:Circadian rhythm,	bhlhe40,
233255_s_at	basic, immunoglobulin-like variable motif containing	13q32-q33.1,	54841,		BIVM,
230722_at, 238478_at	basonuclin 2	9p22.3-p22.2,	54796,		Bnc2,
216231_s_at, 201891_s_at	beta-2-microglobulin	15q21-q22.2,	567,	hsa04612:Antigen processing and presentation,	B2M,	Hypoproteinemia, hypercatabolic,
224471_s_at	beta-transducin repeat containing	10q24.32,	8945,	hsa04114:Oocyte meiosis,hsa04120:Ubiquitin mediated proteolysis,hsa04310:Wnt signaling pathway,hsa04340:Hedgehog signaling pathway,	btrc,
241412_at	betacellulin	4q13-q21,	685,	hsa04012:ErbB signaling pathway,	BTC,
202201_at	biliverdin reductase B (flavin reductase (NADPH))	19q13.1-q13.2,	645,	hsa00860:Porphyrin and chlorophyll metabolism,	BLVRB,
219345_at	bolA homolog 1 (E. coli)	1p36.13-q31.3,	51027,		bola1,
225144_at, 231873_at, 238516_at	bone morphogenetic protein receptor, type II (serine/threonine kinase)	2q33-q34,	659,	hsa04060:Cytokine-cytokine receptor interaction,hsa04350:TGF-beta signaling pathway,	bmpr2,	Primary pulmonary hypertension 1,Pulmonary hypertension, familial primary,Pulmonary hypertension, primary, fenfluramine-associated,Pulmonary venoocclusive disease,
202391_at	brain abundant, membrane attached signal protein 1	5p15.1-p14,	10409,		Basp1,
224367_at	brain expressed X-linked 2	Xq22,	84707,		BEX2,
215440_s_at	brain expressed, X-linked 4	Xq22.1-q22.3,	56271,		BEX4,
229963_at	brain expressed, X-linked 5	Xq22.1,	340542,		BEX5,
227669_at	brain protein 44	1q24,	25874,		BRP44,
202331_at	branched chain keto acid dehydrogenase E1, alpha polypeptide	19q13.1-q13.2,	593,	hsa00280:Valine, leucine and isoleucine degradation,	BCKDHA,	Maple syrup urine disease, type Ia,
234221_at, 204378_at, 234780_at	breast carcinoma amplified sequence 1	20q13.2,	8537,		BCAS1,
230056_at	bromodomain PHD finger transcription factor	17q24.3,	2186,		BPTF,
203080_s_at	bromodomain adjacent to zinc finger domain, 2B	2q23-q24,	29994,		Baz2b,
229694_at	bromodomain and WD repeat domain containing 2	10q26,	55717,		WDR11,	Glioblastoma,
203825_at, 212547_at	bromodomain containing 3	9q34,	8019,		BRD3,
202227_s_at, 242265_at	bromodomain containing 8	5q31,	10902,		BRD8,
209770_at, 207485_x_at	butyrophilin, subfamily 3, member A1	6p22.1,	11119,		BTN3A1,
212613_at, 209846_s_at	butyrophilin, subfamily 3, member A2	6p22.1,	11118,		BTN3A2,
204820_s_at, 38241_at, 204821_at	butyrophilin, subfamily 3, member A3	6p21.3,	10384,		Btn3a3,
205433_at	butyrylcholinesterase	3q26.1-q26.2,	590,		bchE,	Apnea, postanesthetic,
226455_at	cAMP responsive element binding protein 3-like 4	1q21.3,	148327,	hsa04916:Melanogenesis,hsa05016:Huntington's disease,hsa05215:Prostate cancer,	CREB3L4,	607138,
201990_s_at	cAMP responsive element binding protein-like 2	12p13,	1389,		CREBL2,
36499_at, 204029_at	cadherin, EGF LAG seven-pass G-type receptor 2 (flamingo homolog, Drosophila)	1p21,	1952,		CELSR2,	Common variants at 30 loci contribute to polygenic dyslipidemia,Genome-wide association analysis of metabolic traits in a birth cohort from a founder population,Genome-wide association study identifies genes for biomarkers of cardiovascular disease: serum urate and dyslipidemia,LDL-cholesterol concentrations: a genome-wide association study,Loci influencing lipid levels and coronary heart disease…
209002_s_at	calcium binding and coiled-coil domain 1	12q13.13,	57658,		CALCOCO1,
235076_at, 238560_at	calcium binding and coiled-coil domain 2	17q21.32,	10241,		CALCOCO2,
203538_at	calcium modulating ligand	5q23,	819,		CAMLG,	Many sequence variants affecting diversity of adult human height,
212669_at, 212757_s_at, 214322_at	calcium/calmodulin-dependent protein kinase II gamma	10q22,	818,	hsa04012:ErbB signaling pathway,hsa04020:Calcium signaling pathway,hsa04114:Oocyte meiosis,hsa04310:Wnt signaling pathway,hsa04720:Long-term potentiation,hsa04722:Neurotrophin signaling pathway,hsa04740:Olfactory transduction,hsa04912:GnRH signaling pathway,hsa04916:Melanogenesis,hsa05214:Glioma,	CAMK2G,
226424_at	calcyphosine	19p13.3,	828,		CAPS,
201617_x_at, 201616_s_at	caldesmon 1	7q33,	800,	hsa04270:Vascular smooth muscle contraction,	CALD1,
205830_at	calmegin	4q28.3-q31.1,	1047,		clgn,	Genome-wide association to body mass index and waist circumference: the Framingham Heart Study 100K project,
213839_at	calmin (calponin-like, transmembrane)	14q32.13,	79789,		CLMN,
211890_x_at, 210944_s_at	calpain 3, (p94)	15q15.1-q21.1,	825,		capn3,	Muscular dystrophy, limb-girdle, type 2A,
208063_s_at, 210641_at	calpain 9	1q42.11-q42.3,	10753,		Capn9,
1552680_a_at	cancer susceptibility candidate 5	15q14,	57082,		CASC5,
209301_at	carbonic anhydrase II	8q22,	760,	hsa00910:Nitrogen metabolism,	CA2,	Osteopetrosis, autosomal recessive 3, with renal tubular acidosis,Renal tubular acidosis-osteopetrosis syndrome,
209726_at	carbonic anhydrase XI	19q13.3,	770,		CA11,
210735_s_at, 214164_x_at, 203963_at	carbonic anhydrase XII	15q22,	771,	hsa00910:Nitrogen metabolism,	ca12,
1553693_s_at, 213626_at	carbonyl reductase 4	4q32.3,	84869,		cbr4,
205910_s_at, 1553970_s_at	carboxyl ester lipase (bile salt-stimulated lipase)	9q34.3,	1056,	hsa00100:Steroid biosynthesis,hsa00561:Glycerolipid metabolism,	Cel,	Maturity-onset diabetes of the young, type VIII,
227522_at	carboxymethylenebutenolidase homolog (Pseudomonas)	5p15.2,	134147,		Cmbl,
201942_s_at, 201941_at	carboxypeptidase D	17q11.2,	1362,		cpd,
201117_s_at, 201116_s_at	carboxypeptidase E	4q32.3,	1363,	hsa04940:Type I diabetes mellitus,	CPE,
203757_s_at	carcinoembryonic antigen-related cell adhesion molecule 6 (non-specific cross reacting antigen)	19q13.2,	4680,		Ceacam6,
204573_at, 243283_at, 231102_at	carnitine O-octanoyltransferase	7q21.1,	54677,		CROT,
209522_s_at	carnitine acetyltransferase	9q34.1,	1384,		Crat,
224922_at, 203575_at	casein kinase 2, alpha prime polypeptide	16q21,	1459,	hsa04310:Wnt signaling pathway,hsa04520:Adherens junction,hsa04530:Tight junction,	csnk2a2,
209790_s_at	caspase 6, apoptosis-related cysteine peptidase	4q25,	839,	hsa04210:Apoptosis,	CASP6,
1554479_a_at, 204950_at	caspase recruitment domain family, member 8	19q13.32,	22900,	hsa04621:NOD-like receptor signaling pathway,	CARD8,
238363_at, 211922_s_at, 201432_at	catalase	11p13,	847,	hsa00380:Tryptophan metabolism,hsa00680:Methane metabolism,hsa05014:Amyotrophic lateral sclerosis (ALS),	cat,	Acatalasemia,
200661_at	cathepsin A	20q13.1,	5476,	hsa04142:Lysosome,hsa04614:Renin-angiotensin system,	CTSA,	Galactosialidosis,
213275_x_at	cathepsin B	8p22,	1508,	hsa04142:Lysosome,hsa04612:Antigen processing and presentation,	CTSB,
200766_at	cathepsin D	11p15.5,	1509,	hsa04142:Lysosome,	CTSD,	Ceroid lipofuscinosis, neuronal, 10,
203657_s_at	cathepsin F	11q13,	8722,	hsa04142:Lysosome,	ctsf,
202295_s_at	cathepsin H	15q24-q25,	1512,	hsa04142:Lysosome,	CTSH,	Meta-analysis of genome-wide association study data identifies additional type 1 diabetes risk loci,
202450_s_at	cathepsin K	1q21,	1513,	hsa04142:Lysosome,	Ctsk,	Pycnodysostosis,
203758_at	cathepsin O	4q31-q32,	1519,	hsa04142:Lysosome,	Ctso,
212097_at, 203065_s_at	caveolin 1, caveolae protein, 22kDa	7q31.1,	857,	hsa04510:Focal adhesion,hsa05416:Viral myocarditis,	cav1,	Lipodystrophy, congenital generalized, type 3,
209031_at	cell adhesion molecule 1	11q23.2,	23705,	hsa04514:Cell adhesion molecules (CAMs),	CADM1,
1552754_a_at	cell adhesion molecule 2	3p12.1,	253559,		CADM2,
222156_x_at, 214151_s_at, 214152_at, 221156_x_at, 221511_x_at	cell cycle progression 1	15q21.1,	9236,		CCPG1,
235226_at, 212899_at, 212897_at	cell division cycle 2-like 6 (CDK8-like)	6q21,	23097,		CDK19,
217010_s_at, 205167_s_at	cell division cycle 25 homolog C (S. pombe)	5q31,	995,	hsa04110:Cell cycle,hsa04114:Oocyte meiosis,hsa04914:Progesterone-mediated oocyte maturation,	CDC25C,
239014_at	cell division cycle and apoptosis regulator 1	10q21.3,	55749,		Ccar1,
201200_at	cellular repressor of E1A-stimulated genes 1	1q24,	8804,		CREG1,
215882_at, 215170_s_at	centrosomal protein 152kDa	15q21.1,	22995,		CEP152,
213956_at, 213165_at	centrosomal protein 350kDa	1p36.13-q41,	9857,		CEP350,
203494_s_at, 203491_s_at	centrosomal protein 57kDa	11q21,	9702,		Cep57,
212675_s_at, 239442_at, 212677_s_at	centrosomal protein 68kDa	2p14,	23177,		Cep68,
219036_at, 224150_s_at, 238154_at, 1554489_a_at	centrosomal protein 70kDa	3q22-q23,	80321,		Cep70,
218142_s_at, 222533_at	cereblon	3p26.3,	51185,		CRBN,	Mental retardation, autosomal recessive 2A,
210859_x_at	ceroid-lipofuscinosis, neuronal 3	16p12.1,	1201,	hsa04142:Lysosome,	CLN3,	Batten, Spielmeyer-Vogt disease,Ceroid-lipofuscinosis, neuronal-3, juvenile,
218168_s_at	chaperone, ABC1 activity of bc1 complex homolog (S. pombe)	1q42.13,	56997,		cabc1,	Coenzyme Q10 deficiency,Spinocerebellar ataxia, autosomal recessive 9,
206366_x_at, 214567_s_at	chemokine (C motif) ligand 1	1q23,	6375,	hsa04060:Cytokine-cytokine receptor interaction,hsa04062:Chemokine signaling pathway,	XCL1,
238750_at, 224027_at, 224240_s_at	chemokine (C-C motif) ligand 28	5p12,	56477,	hsa04060:Cytokine-cytokine receptor interaction,hsa04062:Chemokine signaling pathway,hsa04672:Intestinal immune network for IgA production,	CCL28,
218002_s_at	chemokine (C-X-C motif) ligand 14	5q31,	9547,	hsa04060:Cytokine-cytokine receptor interaction,hsa04062:Chemokine signaling pathway,	Cxcl14,
217028_at, 209201_x_at	chemokine (C-X-C motif) receptor 4	2q21,	7852,	hsa04060:Cytokine-cytokine receptor interaction,hsa04062:Chemokine signaling pathway,hsa04144:Endocytosis,hsa04360:Axon guidance,hsa04670:Leukocyte transendothelial migration,hsa04672:Intestinal immune network for IgA production,	CXCR4,	Myelokathexis, isolated,WHIM syndrome,
212977_at	chemokine (C-X-C motif) receptor 7	2q37.3,	57007,		cxcr7,
221961_at	chloride channel 7	16p13,	1186,		CLCN7,	Osteopetrosis, autosomal dominant 2,Osteopetrosis, autosomal dominant, type II,Osteopetrosis, autosomal recessive 4,Osteopetrosis, recessive,
230002_at, 233058_at	chloride channel CLIC-like 1	1p13.3,	23155,		CLCC1,
219529_at	chloride intracellular channel 3	9q34.3,	9022,		clic3,
210069_at, 210070_s_at	choline kinase beta; carnitine palmitoyltransferase 1B (muscle)	22q13.33,	1120,1375,	hsa00071:Fatty acid metabolism,hsa00564:Glycerophospholipid metabolism,hsa03320:PPAR signaling pathway,hsa04920:Adipocytokine signaling pathway,	CHKB,Cpt1b,	A genome-wide association study for late-onset Alzheimer's disease using DNA pooling,Variant between CPT1B and CHKB associated with susceptibility to narcolepsy,
230364_at, 1559739_at	choline phosphotransferase 1	12q,	56994,	hsa00564:Glycerophospholipid metabolism,hsa00565:Ether lipid metabolism,	CHPT1,
218177_at, 218178_s_at	chromatin modifying protein 1B	18p11.21,	57132,	hsa04144:Endocytosis,	CHMP1B,
225119_at	chromatin modifying protein 4B	20q11.22,	128866,	hsa04144:Endocytosis,	CHMP4B,	Cataract, posterior polar, 3,Cataract, posterior polar-3,
226803_at	chromatin modifying protein 4C	8q21.13,	92421,	hsa04144:Endocytosis,	Chmp4c,
227558_at	chromobox homolog 4 (Pc class homolog, Drosophila)	17q25.3,	8535,		cbx4,
212914_at	chromobox homolog 7	22q13.1,	23492,		CBX7,
228999_at	chromodomain helicase DNA binding protein 2	15q26,	1106,		CHD2,
225026_at, 225031_at, 1555463_a_at	chromodomain helicase DNA binding protein 6	20q12,	84181,		CHD6,
239654_at	chromodomain helicase DNA binding protein 9	16q12.2,	80205,		CHD9,
240771_at	chromosome 1 open reading frame 101	1q44,	257044,		C1orf101,
230256_at	chromosome 1 open reading frame 104	1q22,	284618,		C1orf104,
218546_at	chromosome 1 open reading frame 115	1q41,	79762,		C1orf115,
228865_at, 219856_at, 219476_at	chromosome 1 open reading frame 116	1q32.1,	79098,		C1orf116,
225786_at	chromosome 1 open reading frame 199	1q44,	284702,		NCRNA00201,
229086_at	chromosome 1 open reading frame 213	1p36.12,	148898,		C1orf213,
233750_s_at, 223404_s_at, 220992_s_at	chromosome 1 open reading frame 25	1q25.2,	81627,		C1orf25,
223548_at	chromosome 1 open reading frame 26	1q25,	54823,		C1orf26,
1558508_a_at	chromosome 1 open reading frame 53	1q31.3,	388722,		C1orf53,
209006_s_at, 215555_at, 209007_s_at	chromosome 1 open reading frame 63	1p36.13-p35.1,	57035,		C1orf63,
218914_at	chromosome 1 open reading frame 66	1q23.1,	51093,		C1orf66,
1558692_at, 225401_at, 1558693_s_at	chromosome 1 open reading frame 85	1q22,	112770,		c1orf85,
224443_at, 224444_s_at	chromosome 1 open reading frame 97	1q32.3,	84791,		C1orf97,
209183_s_at, 209182_s_at	chromosome 10 open reading frame 10	10q11.21,	11067,		C10orf10,
203571_s_at	chromosome 10 open reading frame 116	10q23.2,	10974,		C10orf116,
227701_at	chromosome 10 open reading frame 118	10q25.3,	55088,		C10orf118,
225334_at	chromosome 10 open reading frame 32	10q24.32,	119032,		C10orf32,
228155_at, 218174_s_at, 224435_at	chromosome 10 open reading frame 58; chromosome 10 open reading frame 57	10q22.3,10q23.1,	80195,84293,		C10orf57,C10orf58,
232230_at	chromosome 10 open reading frame 75	10q24.31,	90271,		C10orf75,
222785_x_at, 231530_s_at, 231538_at	chromosome 11 open reading frame 1	11q13-q22,	64776,		C11orf1,
1553787_at	chromosome 11 open reading frame 45	11q24.3,	219833,		C11orf45,
238805_at	chromosome 11 open reading frame 52	11q23.1,	91894,		C11orf52,
1559623_at, 238946_at, 229851_s_at, 223268_at	chromosome 11 open reading frame 54	11q21,	28970,		c11orf54,
220141_at	chromosome 11 open reading frame 63	11q24.1,	79864,		C11orf63,
221600_s_at, 221599_at	chromosome 11 open reading frame 67	11q14.1,	28971,		C11orf67,
218789_s_at	chromosome 11 open reading frame 71	11q14.2-q14.3,	54494,		C11orf71,
217969_at	chromosome 11 open reading frame2	11q13,	738,		c11orf2,
229018_at	chromosome 12 open reading frame 26	12q21.31,	84190,		C12orf26,
64432_at, 1553987_at	chromosome 12 open reading frame 47	12q24.12,	51275,		C12orf47,
1554067_at	chromosome 12 open reading frame 66	12q14.2,	144577,		c12orf66,
226583_at	chromosome 12 open reading frame 76	12q24.11,	400073,		C12orf76,
219544_at	chromosome 13 open reading frame 34	13q22.1,	79866,		c13orf34,
241816_at, 206500_s_at	chromosome 14 open reading frame 106	14q21.3,	55320,		C14orf106,
219563_at	chromosome 14 open reading frame 139	14q32.13,	79686,		C14orf139,
214264_s_at	chromosome 14 open reading frame 143	14q32.11,	90141,		c14orf143,
213508_at, 212460_at	chromosome 14 open reading frame 147	14q13.1,	171546,		c14orf147,
227446_s_at	chromosome 14 open reading frame 167	14q11.2-q21.3,	55449,		C14orf167,
202105_at	chromosome 14 open reading frame 19; immunoglobulin (CD79A) binding protein 1	14q13,Xq13.1-q13.3,	280655,3476,		C14orf19,IGBP1,	Corpus callosum, agenesis of, with mental retardation, ocular coloboma and micrognathia,
235369_at, 238647_at	chromosome 14 open reading frame 28	14q21.3,	122525,		C14orf28,
220173_at	chromosome 14 open reading frame 45	14q24.3,	80127,		C14orf45,
219009_at	chromosome 14 open reading frame 93	14q11.2,	60686,		C14orf93,
224804_s_at	chromosome 15 open reading frame 17	15q24.1,	57184,		C15orf17,
232094_at	chromosome 15 open reading frame 29	15q14,	79768,		c15orf29,
235840_at	chromosome 15 open reading frame 40	15q25.2,	123207,		c15orf40,
223484_at	chromosome 15 open reading frame 48	15q21.1,	84419,		C15orf48,
226692_at	chromosome 15 open reading frame 63; small EDRK-rich factor 2	15q15.3,	10169,25764,		c15orf63,SERF2,
205781_at	chromosome 16 open reading frame 7	16q24,	9605,		C16orf7,
226456_at	chromosome 16 open reading frame 75	16p13.13,	116028,		C16orf75,	Meta-analysis of genome-wide association study data identifies additional type 1 diabetes risk loci,
226657_at	chromosome 17 open reading frame 103	17p11.2,	256302,		C17orf103,
230012_at	chromosome 17 open reading frame 44	17p13.1,	284029,		C17orf44,
226901_at	chromosome 17 open reading frame 58	17q24.2,	284018,		C17orf58,
244417_at, 219417_s_at	chromosome 17 open reading frame 59	17p13.1,	54785,		C17orf59,
227063_at	chromosome 17 open reading frame 61	17p13.1,	254863,		C17orf61,
1553400_a_at	chromosome 17 open reading frame 69	17q21.31,	147081,		C17orf69,
50374_at	chromosome 17 open reading frame 90	17q25.3,	339229,		C17orf90,
207996_s_at	chromosome 18 open reading frame 1	18p11.2,	753,		C18orf1,
213616_at	chromosome 18 open reading frame 10	18q12.2,	25941,		c18orf10,
223631_s_at	chromosome 19 open reading frame 33	19q13.2,	64073,		C19orf33,
222052_at	chromosome 19 open reading frame 54	19q13.2,	284325,		c19orf54,
53720_at	chromosome 19 open reading frame 66	19p13.2,	55337,		c19orf66,
1552740_at	chromosome 2 open reading frame 15	2q11.2,	150590,		C2orf15,
226951_at	chromosome 2 open reading frame 49	2q12.2,	79074,		C2orf49,
225409_at	chromosome 2 open reading frame 64	2q11.2,	493753,		c2orf64,
239682_at, 230561_s_at, 215046_at, 1554791_a_at	chromosome 2 open reading frame 67	2q34,	151050,		c2orf67,
221878_at, 65472_at, 238768_at, 232145_at	chromosome 2 open reading frame 68	2p11.2,	388969,		c2orf68,
1568658_at	chromosome 2 open reading frame 74	2p15,	339804,		C2orf74,
230435_at	chromosome 2 open reading frame 84; hypothetical protein LOC375190	2p23.3,	375190,653140,		C2orf84,LOC375190,
232773_at	chromosome 2 open reading frame 88	2q32.2,	84281,		C2orf88,
224690_at, 224693_at	chromosome 20 open reading frame 108	20q13.2,	116151,		c20orf108,
238920_at	chromosome 20 open reading frame 11	20q13.33,	54994,		c20orf11,
209020_at, 221954_at	chromosome 20 open reading frame 111	20q13.11,	51526,		C20orf111,
225224_at	chromosome 20 open reading frame 112	20q11.1-q11.23,	140688,		C20orf112,
225313_at	chromosome 20 open reading frame 177	20q13.2-q13.33,	63939,		C20orf177,
234314_at	chromosome 20 open reading frame 74	20p11.22,	57186,		RALGAPA2,
242565_x_at, 239208_s_at	chromosome 21 open reading frame 57	21q22.3,	54059,		c21orf57,
228908_s_at	chromosome 21 open reading frame 86	21q22.3,	257103,		NCRNA00205,
224023_s_at	chromosome 3 open reading frame 10	3p25.3,	55845,	hsa04810:Regulation of actin cytoskeleton,	c3orf10,
1555905_a_at, 226688_at, 241666_at, 1555906_s_at	chromosome 3 open reading frame 23	3p21.33-p21.32,	285343,		C3orf23,
230860_at, 1553158_at	chromosome 3 open reading frame 34	3q29,	84984,		C3orf34,
1569129_s_at	chromosome 3 open reading frame 38	3p11.2,	285237,		c3orf38,
241817_at	chromosome 3 open reading frame 62	3p21.31,	375341,		C3orf62,
1559532_at	chromosome 3 open reading frame 71	3p21.31,	646450,		C3orf71,
1562953_s_at, 238081_at, 241401_at	chromosome 4 open reading frame 12	4q21.3,	404201,		C4orf12,
223157_at	chromosome 4 open reading frame 14	4q12,	84273,		C4orf14,
224990_at, 227052_at, 222336_at, 224989_at	chromosome 4 open reading frame 34	4p14,	201895,		C4orf34,
238767_at	chromosome 4 open reading frame 36	4q21.3,	132989,		C4orf36,
230424_at, 201310_s_at, 201309_x_at	chromosome 5 open reading frame 13	5q22.1,	9315,		C5orf13,
225698_at	chromosome 5 open reading frame 26	5q21-q22,	114915,		NCRNA00219,
1557828_a_at, 238635_at	chromosome 5 open reading frame 28	5p12,	64417,		C5orf28,
227877_at	chromosome 5 open reading frame 39	5p12,	389289,		C5orf39,
48031_r_at, 220751_s_at	chromosome 5 open reading frame 4	5q31-q32,	10826,		C5orf4,
1554229_at, 238476_at, 235556_at, 225956_at, 225957_at	chromosome 5 open reading frame 41	5q35.2,	153222,		C5orf41,
226977_at	chromosome 5 open reading frame 53	5q31,	492311,		C5orf53,
220770_s_at	chromosome 5 open reading frame 54	5q33.3,	63920,		C5orf54,
230405_at	chromosome 5 open reading frame 56	5q31.1,	441108,		C5orf56,
229070_at	chromosome 6 open reading frame 105	6p24.1,	84830,		C6orf105,
229444_at	chromosome 6 open reading frame 106	6p21.31,	64771,		C6orf106,	Genome-wide association analysis identifies 20 loci that influence adult height,
210409_at	chromosome 6 open reading frame 124	6q27,	653483,		C6orf124,
213322_at, 238860_at	chromosome 6 open reading frame 130	6p21.1,	221443,		C6orf130,
233438_at	chromosome 6 open reading frame 162	6q15-q16.1,	57150,		C6orf162,
1553726_s_at, 232038_at	chromosome 6 open reading frame 170	6q22.31,	221322,		c6orf170,
210410_s_at, 212913_at	chromosome 6 open reading frame 26	6p21.3,6p21.33,	401251,		C6orf26,
227000_at, 226018_at	chromosome 7 open reading frame 41	7p15.1,	222166,		C7orf41,
226781_at	chromosome 7 open reading frame 55	7q34,	154791,		c7orf55,
236766_at	chromosome 8 open reading frame 38	8q22.1,	137682,		C8orf38,	Leigh syndrome due to mitochondrial complex I deficiency,
225534_at	chromosome 8 open reading frame 40	8p11.21,	114926,		c8orf40,
220216_at	chromosome 8 open reading frame 44	8q13.1,	56260,		C8orf44,
225603_s_at, 225599_s_at	chromosome 8 open reading frame 83	8q22.1,	286144,		C8orf83,
239086_at	chromosome 9 open reading frame 103	9q21-q22,	414328,		C9orf103,
1557014_a_at	chromosome 9 open reading frame 122	9p13.1,	158228,		C9orf122,
239799_at	chromosome 9 open reading frame 130	9q22.32,	100128782,		C9orf130,
227443_at	chromosome 9 open reading frame 150	9p23,	286343,		C9orf150,
204480_s_at	chromosome 9 open reading frame 16	9q34.1,	79095,		C9orf16,
215390_at	chromosome 9 open reading frame 5	9q31,	23731,		c9orf5,
225919_s_at	chromosome 9 open reading frame 72	9p21.2,	203228,		C9orf72,
233504_at	chromosome 9 open reading frame 84	9q31.3,	158401,		C9orf84,
235866_at	chromosome 9 open reading frame 85	9q21.13,	138241,		C9orf85,
220050_at	chromosome 9 open reading frame 9	9q34,	11092,		C9orf9,
219147_s_at	chromosome 9 open reading frame 95	9q21.13,	54981,	hsa00760:Nicotinate and nicotinamide metabolism,	C9orf95,
239034_at	chromosome X open reading frame 24	Xp11.3,	203414,		CXorf24,
226736_at	churchill domain containing 1	14q23.3,	91612,		CHURC1,
223233_s_at, 223232_s_at	cingulin	1q21,	57530,	hsa04530:Tight junction,	cgn,
225817_at	cingulin-like 1	15q21.3,	84952,		cgnl1,
238646_at	clathrin, heavy chain (Hc)	17q11-qter,	1213,	hsa04142:Lysosome,hsa04144:Endocytosis,hsa05016:Huntington's disease,	CLTC,
214598_at	claudin 8	21q22.11,	9073,	hsa04514:Cell adhesion molecules (CAMs),hsa04530:Tight junction,hsa04670:Leukocyte transendothelial migration,	Cldn8,
208791_at, 208792_s_at	clusterin	8p21-p12,	1191,		clu,
205756_s_at	coagulation factor VIII, procoagulant component	Xq28,	2157,	hsa04610:Complement and coagulation cascades,	F8,	Hemophilia A,
214336_s_at	coatomer protein complex, subunit alpha	1q23-q25,	1314,		copA,
223114_at	coenzyme Q5 homolog, methyltransferase (S. cerevisiae)	12q24.31,	84274,	hsa00130:Ubiquinone and other terpenoid-quinone biosynthesis,	COQ5,
224352_s_at	cofilin 2 (muscle)	14q12,	1073,	hsa04360:Axon guidance,hsa04666:Fc gamma R-mediated phagocytosis,hsa04810:Regulation of actin cytoskeleton,	Cfl2,	Nemaline myopathy 7,
236473_at	coiled-coil and C2 domain containing 2A	4p15.33,	57545,		CC2D2A,	Joubert syndrome 9,Meckel syndrome, type 6,Mental retardation and retinitis pigmentosa,
1552326_a_at	coiled-coil domain containing 11	18q21.1,	220136,		CCDC11,
222890_at	coiled-coil domain containing 113	16q21,	29070,		CCDC113,
233157_x_at	coiled-coil domain containing 114	19q13.32,	93233,		Ccdc114,
224946_s_at	coiled-coil domain containing 115	2q21.1,	84317,		CCDC115,
220321_s_at	coiled-coil domain containing 121	2p23.2,	79635,		CCDC121,
227091_at	coiled-coil domain containing 146	7q11.23,	57639,		CCDC146,
232362_at	coiled-coil domain containing 18	1p22.1,	343099,		Ccdc18,
226723_at	coiled-coil domain containing 23	1p34.2,	374969,		Ccdc23,
209479_at	coiled-coil domain containing 28A	6q23.1-q24.1,	25901,		CCDC28A,
228693_at	coiled-coil domain containing 50	3q28,	152137,		CCDC50,	Deafness, autosomal dominant 44,
239091_at	coiled-coil domain containing 52	3q13.2,	152185,		CCDC52,
218628_at	coiled-coil domain containing 53	12q23.2,	51019,		ccdc53,
204716_at, 225010_at	coiled-coil domain containing 6	10q21,	8030,	hsa05200:Pathways in cancer,hsa05216:Thyroid cancer,	CCDC6,	Thyroid papillary carcinoma,
204610_s_at	coiled-coil domain containing 85B	11q12.1,	11007,		CCDC85B,
1568834_s_at	coiled-coil domain containing 90B	11q14.1,	60492,		CCDC90B,
225191_at, 200811_at, 200810_s_at, 228519_x_at, 230142_s_at	cold inducible RNA binding protein	19p13.3,	1153,		Cirbp,
1556499_s_at	collagen, type I, alpha 1	17q21.33,	1277,	hsa04510:Focal adhesion,hsa04512:ECM-receptor interaction,	COL1A1,	A genome-wide association study of breast and prostate cancer in the NHLBI's Framingham Heart Study,Caffey disease,Dissection of cervical arteries,Ehlers-Danlos syndrome, type I,Ehlers-Danlos syndrome, type VII,OI type II,OI type III,OI type IV,OI/EDS combined syndrome,Osteogenesis imperfecta, type I,Osteogenesis imperfecta, type II,Osteogenesis imperfecta, type III,Osteogenesis imperfecta,type I…
213110_s_at	collagen, type IV, alpha 5	Xq22,	1287,		COL4A5,	Alport syndrome,
221729_at, 221730_at	collagen, type V, alpha 2	2q14-q32,	1290,	hsa04510:Focal adhesion,hsa04512:ECM-receptor interaction,	Col5a2,	Ehlers-Danlos syndrome, type I,
204136_at	collagen, type VII, alpha 1	3p21.1,	1294,		COL7A1,	EBD inversa,EBD, Bart type,EBD, localisata variant,Epidermolysis bullosa dystrophica, AD,Epidermolysis bullosa dystrophica, AR,Epidermolysis bullosa pruriginosa,Epidermolysis bullosa, pretibial,Toenail dystrophy, isolated,Transient bullous of the newborn,
225664_at, 231766_s_at	collagen, type XII, alpha 1	6q12-q13,	1303,		col12a1,
218983_at	complement component 1, r subcomponent-like	12p13.31,	51279,		C1RL,
208451_s_at	complement component 4A (Rodgers blood group)	6p21.3,	720,	hsa04610:Complement and coagulation cascades,hsa05322:Systemic lupus erythematosus,	C4a,	Blood group, Rodgers,C4 deficiency,Systemic lupus erythematosus, susceptibility to or protection against,
205500_at	complement component 5	9q33-q34,	727,	hsa04610:Complement and coagulation cascades,hsa05020:Prion diseases,hsa05322:Systemic lupus erythematosus,	C5,	C5 deficiency,Liver fibrosis, susceptibility to,
202357_s_at	complement factor B	6p21.3,	629,	hsa04610:Complement and coagulation cascades,	CFB,	Macular degeneration, age-related, reduced risk of,
225769_at	component of oligomeric golgi complex 6	13q13.3,	57511,		COG6,	A genome-wide association study of psoriasis and psoriatic arthritis identifies new disease Loci,
228516_at	congenital dyserythropoietic anemia, type I	15q15.2,	146059,		Cdan1,	A Genome-Wide Association Study Identifies Protein Quantitative Trait Loci (pQTLs),Anemia, congenital dyserythropoietic, type I,
209101_at	connective tissue growth factor	6q23.1,	1490,		CTGF,
227209_at, 211203_s_at	contactin 1	12q11-q12,	1272,	hsa04514:Cell adhesion molecules (CAMs),	Cntn1,	A Genome-Wide Association Study Identifies Protein Quantitative Trait Loci (pQTLs),Myopathy, congenital, Compton-North,
213050_at, 1552496_a_at	cordon-bleu homolog (mouse)	7p12.1,	23242,		cobL,
207625_s_at, 238549_at, 209144_s_at	core-binding factor, runt domain, alpha subunit 2; translocated to, 2	20q11,	9139,		CBFA2T2,
224329_s_at	cornifelin	19q13.2,	84518,		CNFN,
203917_at, 226374_at	coxsackie virus and adenovirus receptor pseudogene 2; coxsackie virus and adenovirus receptor	15q11.2,21q21.1,	1525,646243,	hsa05416:Viral myocarditis,	cxadr,CXADRP2,
209283_at	crystallin, alpha B	11q22.3-q23.1,	1410,		CRYAB,	Cataract, posterior polar 2,Myopathy, cardioskeletal, desmin-related, with cataract,
1552347_at, 226151_x_at	crystallin, zeta (quinone reductase)-like 1	21q21.3,	9946,		CRYZL1,
210257_x_at	cullin 4B	Xq23,	8450,	hsa03420:Nucleotide excision repair,hsa04120:Ubiquitin mediated proteolysis,	CUL4B,	Mental retardation syndrome, X-linked, Cabezas type,Mental retardation-hypotonic facies syndrome, X-linked, 2,
230393_at	cullin 5	11q22-q23,	8065,	hsa04120:Ubiquitin mediated proteolysis,	CUL5,
205899_at	cyclin A1	13q12.3-q13,	8900,	hsa04110:Cell cycle,hsa04914:Progesterone-mediated oocyte maturation,hsa05200:Pathways in cancer,hsa05221:Acute myeloid leukemia,	CCNA1,
223084_s_at	cyclin D-type binding-protein 1	15q14-q15,	23582,		Ccndbp1,
200953_s_at	cyclin D2	12p13,	894,	hsa04110:Cell cycle,hsa04115:p53 signaling pathway,hsa04310:Wnt signaling pathway,hsa04510:Focal adhesion,hsa04630:Jak-STAT signaling pathway,	CCND2,
1555056_at, 211559_s_at, 202770_s_at, 202769_at, 228081_at	cyclin G2	4q21.1,	901,	hsa04115:p53 signaling pathway,	CCNG2,
227299_at, 208656_s_at, 208655_at	cyclin I	4q21.1,	10983,		CCNI,
1557830_at	cyclin J	10pter-q26.12,	54619,		CCNJ,
204247_s_at	cyclin-dependent kinase 5	7q36,	1020,	hsa04360:Axon guidance,hsa05010:Alzheimer's disease,	cdk5,
211297_s_at	cyclin-dependent kinase 7	5q12.1,	1022,	hsa03420:Nucleotide excision repair,hsa04110:Cell cycle,	CDK7,
209112_at	cyclin-dependent kinase inhibitor 1B (p27, Kip1)	12p13.1-p12,	1027,	hsa04012:ErbB signaling pathway,hsa04110:Cell cycle,hsa05200:Pathways in cancer,hsa05215:Prostate cancer,hsa05220:Chronic myeloid leukemia,hsa05222:Small cell lung cancer,	CDKN1B,	Multiple endocrine neoplasia, type IV,
213182_x_at, 219534_x_at, 213183_s_at, 213348_at, 216894_x_at	cyclin-dependent kinase inhibitor 1C (p57, Kip2)	11p15.5,	1028,	hsa04110:Cell cycle,	CDKN1C,	Beckwith-Wiedemann syndrome,
207039_at	cyclin-dependent kinase inhibitor 2A (melanoma, p16, inhibits CDK4)	9p21,	1029,	hsa04110:Cell cycle,hsa04115:p53 signaling pathway,hsa05200:Pathways in cancer,hsa05212:Pancreatic cancer,hsa05214:Glioma,hsa05218:Melanoma,hsa05219:Bladder cancer,hsa05220:Chronic myeloid leukemia,hsa05223:Non-small cell lung cancer,	CDKN2A,	A common variant on chromosome 9p21 affects the risk of myocardial infarction,A genome-wide association study of type 2 diabetes in Finns detects multiple susceptibility variants,Genome-wide association analysis identifies loci for type 2 diabetes and triglyceride levels,Genome-wide association study of 14,000 cases of seven common diseases and 3,000 shared controls,Li Fraumeni syndrome,Melanoma …
236313_at	cyclin-dependent kinase inhibitor 2B (p15, inhibits CDK4)	9p21,	1030,	hsa04110:Cell cycle,hsa04350:TGF-beta signaling pathway,hsa05200:Pathways in cancer,hsa05222:Small cell lung cancer,	cdkn2b,	A common variant on chromosome 9p21 affects the risk of myocardial infarction,A genome-wide association study of type 2 diabetes in Finns detects multiple susceptibility variants,Adiposity-related heterogeneity in patterns of type 2 diabetes susceptibility observed in genome wide association data,Genome-wide association analysis identifies loci for type 2 diabetes and triglyceride levels,Genome-w…
204159_at, 211792_s_at	cyclin-dependent kinase inhibitor 2C (p18, inhibits CDK4)	1p32,	1031,	hsa04110:Cell cycle,	CDKN2C,
236331_at	cyclin-dependent kinase-like 2 (CDC2-related kinase)	4q21.1,	8999,		CDKL2,
219831_at	cyclin-dependent kinase-like 3	5q31,	51265,		Cdkl3,
213295_at, 39582_at	cylindromatosis (turban tumor syndrome)	16q12.1,	1540,	hsa04622:RIG-I-like receptor signaling pathway,	CYLD,	Brooke-Spiegler syndrome,Cylindromatosis, familial,Spiegler-Brooke syndrome,Trichoepithelioma, multiple familial, 1,
217127_at, 206085_s_at	cystathionase (cystathionine gamma-lyase)	1p31.1,	1491,	hsa00260:Glycine, serine and threonine metabolism,hsa00270:Cysteine and methionine metabolism,hsa00450:Selenoamino acid metabolism,hsa00910:Nitrogen metabolism,	CTH,	Cystathioninuria,Homocysteine, total plasma, elevated,
204971_at	cystatin A (stefin A)	3q21,	1475,		cstA,
1568620_at, 221139_s_at	cysteine sulfinic acid decarboxylase	12q13.11-q14.3,	51380,	hsa00430:Taurine and hypotaurine metabolism,	CSAD,
228318_s_at	cysteine-rich PAK1 inhibitor	4p16.3,	285464,		CRIPAK,
218643_s_at	cysteine-rich PDZ-binding protein	2p21,	9419,		cript,
208978_at	cysteine-rich protein 2	14q32.3,	1397,		CRIP2,
223475_at	cysteine-rich secretory protein LCCL domain containing 1	8q21.11,	83690,		CRISPLD1,
205749_at	cytochrome P450, family 1, subfamily A, polypeptide 1	15q24.1,	1543,	hsa00140:Steroid hormone biosynthesis,hsa00380:Tryptophan metabolism,hsa00830:Retinol metabolism,hsa00980:Metabolism of xenobiotics by cytochrome P450,	CYP1A1,
202434_s_at, 202435_s_at, 202437_s_at, 202436_s_at	cytochrome P450, family 1, subfamily B, polypeptide 1	2p21,	1545,	hsa00140:Steroid hormone biosynthesis,hsa00380:Tryptophan metabolism,hsa00980:Metabolism of xenobiotics by cytochrome P450,	CYP1B1,	Glaucoma 3A, primary congenital,Glaucoma, early-onset, digenic,Glaucoma, primary open angle, adult-onset,Glaucoma, primary open angle, juvenile-onset,Peters anomaly,
226402_at	cytochrome P450, family 2, subfamily U, polypeptide 1	4q25,	113612,	hsa00590:Arachidonic acid metabolism,	CYP2U1,
244407_at, 1553977_a_at, 220432_s_at	cytochrome P450, family 39, subfamily A, polypeptide 1	6p21.1-p11.2,	51302,	hsa00120:Primary bile acid biosynthesis,	CYP39A1,
210096_at, 1555497_a_at	cytochrome P450, family 4, subfamily B, polypeptide 1	1p34-p12,	1580,		cyp4b1,
206515_at	cytochrome P450, family 4, subfamily F, polypeptide 3	19p13.2,	4051,	hsa00590:Arachidonic acid metabolism,	CYP4F3,
228391_at	cytochrome P450, family 4, subfamily V, polypeptide 2	4q35.2,	285440,		CYP4V2,	Bietti crystalline corneoretinal dystrophy,
232459_at, 222453_at, 217889_s_at	cytochrome b reductase 1	2q31.1,	79901,		cybrd1,
203028_s_at	cytochrome b-245, alpha polypeptide	16q24,	1535,	hsa04670:Leukocyte transendothelial migration,	CYBA,	Cardiovascular Disease,Chronic granulomatous disease, autosomal, due to deficiency of CYBA,
225804_at	cytochrome b5 domain containing 2	17p13.2,	124936,		Cyb5d2,
202263_at	cytochrome b5 reductase 1	1p36.13-q41,	51706,	hsa00520:Amino sugar and nucleotide sugar metabolism,	CYB5R1,
1555842_at	cytohesin 2	19q13.33,	9266,		CYTH2,
220999_s_at, 215785_s_at	cytoplasmic FMR1 interacting protein 2	5q33.3,	26999,	hsa04810:Regulation of actin cytoskeleton,	CYFIP2,
226939_at	cytoplasmic polyadenylation element binding protein 2	4p15.33,	132864,		CPEB2,
205773_at	cytoplasmic polyadenylation element binding protein 3	10q23.32,	22849,		CPEB3,
1554264_at	cytoskeleton associated protein 2	13q14,	26586,		Ckap2,
228915_at, 205471_s_at	dachshund homolog 1 (Drosophila)	13q22,	1602,		Dach1,
239310_at	damage-specific DNA binding protein 2, 48kDa	11p12-p11,	1643,	hsa03420:Nucleotide excision repair,hsa04115:p53 signaling pathway,hsa04120:Ubiquitin mediated proteolysis,	DDB2,	Xeroderma pigmentosum, group E, DDB-negative subtype,
235365_at	deafness, autosomal recessive 59	2q31.2,	494513,		DFNB59,	Deafness, autosomal recessive 59,
225434_at	death effector domain containing 2	19q13.2,	162989,		DEDD2,
213213_at	death inducer-obliterator 1	20q13.33,	11083,		DIDO1,
203139_at	death-associated protein kinase 1	9q34.1,	1612,	hsa05200:Pathways in cancer,hsa05219:Bladder cancer,	DAPK1,
215184_at, 206324_s_at	death-associated protein kinase 2	15q22.31,	23604,	hsa05200:Pathways in cancer,hsa05219:Bladder cancer,	DAPK2,
201893_x_at	decorin	12q21.33,	1634,	hsa04350:TGF-beta signaling pathway,	DCN,	Corneal dystrophy, congenital stromal,
226875_at	dedicator of cytokinesis 11	Xq24,	139818,		DOCK11,
213279_at	dehydrogenase/reductase (SDR family) member 1	14q12,	115817,		dhrs1,
214079_at	dehydrogenase/reductase (SDR family) member 2	14q11.2,	10202,		Dhrs2,
202481_at	dehydrogenase/reductase (SDR family) member 3	1p36.1,	9249,	hsa00830:Retinol metabolism,	Dhrs3,
231240_at	deiodinase, iodothyronine, type II	14q24.2-q24.3,	1734,		dio2,
1556821_x_at	deleted in lymphocytic leukemia 2 (non-protein coding); deleted in lymphocytic leukemia 2-like	13q14.3,1p31-p22,	79469,8847,		Dleu2,DLEU2L,
224215_s_at	delta-like 1 (Drosophila)	6q27,	28514,	hsa04330:Notch signaling pathway,	DLL1,
203912_s_at	deoxyribonuclease I-like 1	Xq28,	1774,		Dnase1l1,
214992_s_at, 209831_x_at	deoxyribonuclease II, lysosomal	19p13.2,	1777,	hsa04142:Lysosome,	DNASE2,
226926_at	dermokine	19q13.12,	93099,		Dmkn,
226817_at	desmocollin 2	18q12.1,	1824,	hsa05412:Arrhythmogenic right ventricular cardiomyopathy (ARVC),	DSC2,	Arrhythmogenic right ventricular dysplasia, familial, 11,
200606_at	desmoplakin	6p24,	1832,	hsa05412:Arrhythmogenic right ventricular cardiomyopathy (ARVC),	dsp,	Arrhythmogenic right ventricular dysplasia 8,Dilated cardiomyopathy with woolly hair and keratoderma,Epidermolysis bullosa, lethal acantholytic,Keratosis palmoplantaris striata II,Skin fragility-woolly hair syndrome,
205726_at	diaphanous homolog 2 (Drosophila)	Xq21.33,	1730,	hsa04810:Regulation of actin cytoskeleton,	DIAPH2,	Premature ovarian failure,
209389_x_at, 202428_x_at, 211070_x_at	diazepam binding inhibitor (GABA receptor modulator, acyl-Coenzyme A binding protein)	2q12-q21,	1622,	hsa03320:PPAR signaling pathway,	DBI,
232947_at	dickkopf homolog 3 (Xenopus laevis)	11p15.2,	27122,		DKK3,
205371_s_at, 231919_at, 205369_x_at, 244687_at	dihydrolipoamide branched chain transacylase E2	1p31,	1629,	hsa00280:Valine, leucine and isoleucine degradation,	DBT,	Maple syrup urine disease, type II,
202262_x_at	dimethylarginine dimethylaminohydrolase 2	6p21.3,	23564,		ddah2,
220179_at	dipeptidase 3	16q22.1,	64180,		DPEP3,
201278_at, 201280_s_at	disabled homolog 2, mitogen-responsive phosphoprotein (Drosophila)	5p13,	1601,	hsa04144:Endocytosis,	DAB2,
210749_x_at, 207169_x_at	discoidin domain receptor tyrosine kinase 1	6p21.3,	780,		DDR1,
1556769_a_at	discs, large (Drosophila) homolog-associated protein 1	18p11.3,	9229,		dlgap1,
203764_at	discs, large (Drosophila) homolog-associated protein 5	14q22.3,	9787,		DLGAP5,
232552_at, 226666_at, 216060_s_at	dishevelled associated activator of morphogenesis 1	14q23.1,	23002,	hsa04310:Wnt signaling pathway,	DAAM1,
209691_s_at	docking protein 4	16q13,	55715,		Dok4,
236290_at, 231980_at	docking protein 6	18q22.2,	220164,		Dok6,
219373_at	dolichyl-phosphate mannosyltransferase polypeptide 3	1q22,	54344,	hsa00510:N-Glycan biosynthesis,	dpm3,
205248_at	dopey family member 2	21q22.2,	9980,		Dopey2,
229017_s_at	dual serine/threonine and tyrosine protein kinase	1q32.1,	25778,		DSTYK,
201041_s_at	dual specificity phosphatase 1	5q34,	1843,	hsa04010:MAPK signaling pathway,	DUSP1,
1558739_at, 224336_s_at, 224832_at	dual specificity phosphatase 16	12p13,	80824,	hsa04010:MAPK signaling pathway,	DUSP16,
1555598_a_at, 1552705_at	dual specificity phosphatase 19	2q32.1,	142679,		dusp19,
229211_at	dual specificity phosphatase 28	2q37.3,	285193,		Dusp28,
1553299_at	dual specificity phosphatase 5 pseudogene	1q42.13,	574029,		DUSP5P,
232381_s_at	dynein, axonemal, heavy chain 5	5p15.2,	1767,		DNAH5,	Ciliary dyskinesia, primary, 3, with or without situs inversus,Genome-wide association study for subclinical atherosclerosis in major arterial territories in the NHLBI's Framingham Heart Study,
204008_at	dynein, axonemal, light chain 4	22q13.1,	10126,	hsa05016:Huntington's disease,	DNAL4,
227081_at	dynein, axonemal, light intermediate chain 1	1p35.1,	7802,	hsa05016:Huntington's disease,	DNALI1,
229115_at	dynein, cytoplasmic 1, heavy chain 1	14q32.3-qter,14q32.3-qter|14q32,	1778,		DYNC1H1,
205348_s_at	dynein, cytoplasmic 1, intermediate chain 1	7q21.3-q22.1,	1780,		Dync1i1,
203762_s_at, 203763_at	dynein, cytoplasmic 2, light intermediate chain 1	2p25.1-p24.1,	51626,		DYNC2LI1,
217917_s_at	dynein, light chain, roadblock-type 1	20q11.21,	83658,		DYNLRB1,
238116_at	dynein, light chain, roadblock-type 2	16q23.3,	83657,		Dynlrb2,
1558019_at, 232098_at	dystonin	6p12.1,	667,		DST,
227084_at	dystrobrevin, alpha	18q12,	1837,		Dtna,	Left ventricular noncompaction with congenital heart defects,Left ventricular noncompaction, familial isolated, 1,
204796_at, 204797_s_at	echinoderm microtubule associated protein like 1	14q32,	2009,		EML1,
242443_at	echinoderm microtubule associated protein like 5	14q31.3,	161436,		EML5,
204160_s_at	ectonucleotide pyrophosphatase/phosphodiesterase 4 (putative function)	6p12.3,	22875,		Enpp4,
237054_at, 227803_at	ectonucleotide pyrophosphatase/phosphodiesterase 5 (putative function)	6p21.1-p11.2,	59084,		Enpp5,
219518_s_at	elongation factor RNA polymerase II-like 3	15q15.3,	80237,		ELL3,
227450_at	endoplasmic reticulum protein 27	12p12.3,	121506,		ERP27,
1564630_at, 218995_s_at, 222802_at	endothelin 1	6p24.1,	1906,	hsa04916:Melanogenesis,	EDN1,	High density lipoprotein cholesterol level QTL 7,
225838_at	enhancer of polycomb homolog 2 (Drosophila)	2q23.1,	26122,		EPC2,	A Genome-Wide Association Study Identifies Protein Quantitative Trait Loci (pQTLs),
32259_at, 203249_at	enhancer of zeste homolog 1 (Drosophila)	17q21.1-q21.3,	2145,		EZH1,
204483_at	enolase 3 (beta, muscle)	17pter-p11,	2027,	hsa00010:Glycolysis / Gluconeogenesis,hsa03018:RNA degradation,	ENO3,	Enolase-beta deficiency,
200789_at	enoyl Coenzyme A hydratase 1, peroxisomal	19q13.1,	1891,		ech1,
218552_at	enoyl Coenzyme A hydratase domain containing 2	1p32.3,	55268,		Echdc2,
205222_at	enoyl-Coenzyme A, hydratase/3-hydroxyacyl Coenzyme A dehydrogenase	3q26.3-q28,	1962,	hsa00071:Fatty acid metabolism,hsa00280:Valine, leucine and isoleucine degradation,hsa00310:Lysine degradation,hsa00380:Tryptophan metabolism,hsa00410:beta-Alanine metabolism,hsa00640:Propanoate metabolism,hsa00650:Butanoate metabolism,hsa00903:Limonene and pinene degradation,hsa03320:PPAR signaling pathway,	EHHADH,
202023_at	ephrin-A1	1q21-q22,	1942,	hsa04360:Axon guidance,	EFNA1,
205107_s_at	ephrin-A4	1q21-q22,	1945,	hsa04360:Axon guidance,	EFNA4,
205031_at	ephrin-B3	17p13.1-p11.2,	1949,	hsa04360:Axon guidance,	Efnb3,
211607_x_at, 1565483_at, 201983_s_at, 210984_x_at	epidermal growth factor receptor (erythroblastic leukemia viral (v-erb-b) oncogene homolog, avian)	7p12,	1956,	hsa04010:MAPK signaling pathway,hsa04012:ErbB signaling pathway,hsa04020:Calcium signaling pathway,hsa04060:Cytokine-cytokine receptor interaction,hsa04144:Endocytosis,hsa04320:Dorso-ventral axis formation,hsa04510:Focal adhesion,hsa04520:Adherens junction,hsa04540:Gap junction,hsa04810:Regulation of actin cytoskeleton,hsa04912:GnRH signaling pathway,hsa05120:Epithelial cell signaling in Helicoba…	egfr,	Adenocarcinoma of lung, response to tyrosine kinase inhibitor in,Nonsmall cell lung cancer, response to tyrosine kinase inhibitor in,Nonsmall cell lung cancer, susceptibility to,
227609_at	epithelial stromal interaction 1 (breast)	13q13.3,	94240,		EPSTI1,
209368_at	epoxide hydrolase 2, cytoplasmic	8p21-p12,	2053,	hsa00590:Arachidonic acid metabolism,	Ephx2,	Hypercholesterolemia, familial, due to LDLR defect, modifier of,
219905_at	erythroblast membrane-associated protein (Scianna blood group)	1p34.2,	114625,		ERMAP,	Blood group, Radin,Blood group, Radin antigen,Blood group, Scianna system,
236379_at	erythrocyte membrane protein band 4.1 (elliptocytosis 1, RH-linked)	1p33-p32,	2035,	hsa04530:Tight junction,	epb41,	Elliptocytosis-1,
228256_s_at	erythrocyte membrane protein band 4.1 like 4A	5q22.2,	64097,		EPB41L4A,
225855_at	erythrocyte membrane protein band 4.1 like 5	2q14.2,	57669,		epb41l5,
212336_at, 212339_at	erythrocyte membrane protein band 4.1-like 1	20q11.2-q12,	2036,	hsa04530:Tight junction,	EPB41L1,
37986_at, 209962_at, 215054_at	erythropoietin receptor	19p13.3-p13.2,	2057,	hsa04060:Cytokine-cytokine receptor interaction,hsa04630:Jak-STAT signaling pathway,hsa04640:Hematopoietic cell lineage,	EPOR,	Erythrocytosis, familial,
234464_s_at	essential meiotic endonuclease 1 homolog 1 (S. pombe)	17q21.33,	146956,	hsa03440:Homologous recombination,	EME1,
207981_s_at	estrogen-related receptor gamma	1q41,	2104,		esrrg,
225645_at, 232360_at, 219850_s_at, 224189_x_at	ets homologous factor	11p12,	26298,		Ehf,	Genetic correlates of brain aging on MRI and cognitive test measures: a genome-wide association and linkage analysis in the Framingham Study,
225764_at	ets variant 6	12p13,	2120,	hsa04320:Dorso-ventral axis formation,	ETV6,	Leukemia, acute myeloid, somatic,Many sequence variants affecting diversity of adult human height,myeloproliverative disorder, chronic, with eosinophilia,
225546_at, 225545_at	eukaryotic elongation factor-2 kinase	16p12.1,	29904,		eef2k,
227708_at	eukaryotic translation elongation factor 1 alpha-like 7; eukaryotic translation elongation factor 1 alpha-like 3; similar to eukaryotic translation elongation factor 1 alpha 1; eukaryotic translation elongation factor 1 alpha 1	3p22.1,4q24,6q14.1,9q34.12-q34.2,	158078,1915,441032,645715,		EEF1A1,EEF1A1P24,EEF1A1P5,EEF1A1P9,
214395_x_at	eukaryotic translation elongation factor 1 delta (guanine nucleotide exchange protein)	8q24.3,	1936,		EEF1D,
200094_s_at	eukaryotic translation elongation factor 2	19pter-q12,	1938,		Eef2,
205321_at	eukaryotic translation initiation factor 2, subunit 3 gamma, 52kDa	Xp22.2-p22.1,	1968,		eif2s3,
217735_s_at, 217736_s_at	eukaryotic translation initiation factor 2-alpha kinase 1	7p22,	27102,		Eif2ak1,
219190_s_at	eukaryotic translation initiation factor 2C, 3	1p34.3,	192669,		EIF2C3,
227930_at	eukaryotic translation initiation factor 2C, 4	1p34.3,	192670,		EIF2C4,
244015_at	eukaryotic translation initiation factor 4 gamma, 3	1p36.12,	8672,	hsa05416:Viral myocarditis,	Eif4g3,
202414_at	excision repair cross-complementing rodent repair deficiency, complementation group 5	13q33,	2073,	hsa03420:Nucleotide excision repair,	ERCC5,	Cerebrooculofacioskeletal syndrome,Cerebrooculofacioskeletal syndrome 3,Xeroderma pigmentosum, group G,
222127_s_at	exocyst complex component 1	4q12,	55763,		exoc1,
228847_at	exocyst complex component 3	5p15.33,	11336,	hsa04530:Tight junction,	EXOC3,
215215_s_at, 208107_s_at	exonuclease NEF-sp	16p12.2,	81691,		LOC81691,
214734_at, 213929_at	exophilin 5	11q22.3,	23086,		EXPH5,
235927_at	exportin 1 (CRM1 homolog, yeast)	2p16,	7514,		xpo1,
214608_s_at	eyes absent homolog 1 (Drosophila)	8q13.3,	2138,		Eya1,	Anterior segment anomalies and cataract,Branchiootic syndrome,Branchiootorenal syndrome,Branchiootorenal syndrome with cataract,Genome-wide association of sleep and circadian phenotypes,Melnick-Fraser syndrome,Otofaciocervical syndrome,
226568_at	family with sequence similarity 102, member B	1p13.3,	284611,		Fam102b,
228298_at	family with sequence similarity 113, member B	12q13.11,	91523,		FAM113B,
212979_s_at, 212981_s_at, 210529_s_at	family with sequence similarity 115, member A; family with sequence similarity 115, member B (pseudogene)	7q35,	653199,9747,		FAM115A,FAM115B,
221249_s_at	family with sequence similarity 117, member A	17q21.33,	81558,		Fam117a,
226431_at	family with sequence similarity 117, member B	2q33.1,	150864,		fam117b,
1553743_at	family with sequence similarity 119, member A	2q33.3,	151194,		Fam119a,
1552323_s_at, 241991_at	family with sequence similarity 122C	Xq26.3,	159091,		FAM122C,
232628_at, 202973_x_at	family with sequence similarity 13, member A	4q22.1,	10144,		Fam13a,
221984_s_at, 222129_at	family with sequence similarity 134, member A	2q35,	79137,		FAM134A,
236215_at	family with sequence similarity 164, member A	8q21.12,	51101,		FAM164A,
220107_s_at	family with sequence similarity 164, member C	14q24.3,	79696,		Fam164c,
228239_at	family with sequence similarity 165, member B	21q22.12,	54065,		FAM165B,
227370_at	family with sequence similarity 171, member B	2q32.1,	165215,		Fam171b,
233823_at	family with sequence similarity 184, member B	4p16,	27146,		Fam184b,
227410_at	family with sequence similarity 43, member A	3q29,	131583,		fam43a,
221766_s_at, 224973_at	family with sequence similarity 46, member A	6q14,	55603,		Fam46a,
229518_at	family with sequence similarity 46, member B	1p36.11,	115572,		Fam46b,
243606_at, 235030_at	family with sequence similarity 55, member C	3q12.3,	91775,		FAM55C,
221856_s_at	family with sequence similarity 63, member A	1q21.2,	55793,		fam63a,
226873_at	family with sequence similarity 63, member B	15q22.1,	54629,		Fam63b,
1553750_a_at, 226753_at	family with sequence similarity 76, member B	11q21,	143684,		fam76b,
244644_at	family with sequence similarity 9, member C	Xp22.2,	171484,		FAM9C,
241954_at, 238666_at	farnesyl-diphosphate farnesyltransferase 1	8p23.1-p22,	2222,	hsa00100:Steroid biosynthesis,	FDFT1,
1568865_at	farnesyltransferase, CAAX box, beta	14q23-q24,	2342,		Fntb,
230792_at	fatty acid amide hydrolase 2	Xp11.1,	158584,		FAAH2,
238861_at, 238484_s_at	fatty acid desaturase 2	11q12-q13.1,	9415,	hsa00592:alpha-Linolenic acid metabolism,hsa01040:Biosynthesis of unsaturated fatty acids,hsa03320:PPAR signaling pathway,	FADS2,	Common variants at 30 loci contribute to polygenic dyslipidemia,Genome-wide association analysis of metabolic traits in a birth cohort from a founder population,Loci influencing lipid levels and coronary heart disease risk in 16 European population cohorts,
1557224_at	fatty acyl CoA reductase 2	12p11.22,	55711,		FAR2,
214211_at	ferritin, heavy polypeptide 1; ferritin, heavy polypeptide-like 16; similar to ferritin, heavy polypeptide 1; ferritin, heavy polypeptide-like 3 pseudogene	11q13,2p23.3,2q31.3,	2495,2498,2508,729009,	hsa00860:Porphyrin and chlorophyll metabolism,	FTH1,FTHL16,FTHL20,FTHL3,	Iron overload, autosomal dominant,
203115_at	ferrochelatase (protoporphyria)	18q21.3,	2235,	hsa00860:Porphyrin and chlorophyll metabolism,	FECH,	Protoporphyria, erythropoietic,Protoporphyria, erythropoietic, autosomal dominant,Protoporphyria, erythropoietic, autosomal recessive,Protoporphyria, erythropoietic, recessive, with liver failure,
207501_s_at	fibroblast growth factor 12	3q28,	2257,	hsa04010:MAPK signaling pathway,hsa04810:Regulation of actin cytoskeleton,hsa05200:Pathways in cancer,hsa05218:Melanoma,	fgf12,	Genetics Meets Metabolomics: A Genome-Wide Association Study of Metabolite Profiles in Human Serum,
204379_s_at	fibroblast growth factor receptor 3	4p16.3,	2261,	hsa04010:MAPK signaling pathway,hsa04144:Endocytosis,hsa04810:Regulation of actin cytoskeleton,hsa05200:Pathways in cancer,hsa05219:Bladder cancer,	fgfr3,	achondroplasia,Bladder cancer,CATSHL syndrome,Cervical cancer, somatic,Colorectal cancer, somatic,Crouzon syndrome with acanthosis nigricans,Hypochondroplasia,LADD syndrome,Muenke syndrome,Nevus, keratinocytic, nonepidermolytic,Thanatophoric dysplasia, types I and II,
232968_at	fibronectin type III and ankyrin repeat domains 1	10q26.2,	92565,		FANK1,
202995_s_at	fibulin 1	22q13.31,	2192,		FBLN1,	Synpolydactyly, 3/3'4, associated with metacarpal and metatarsal synostoses,
203886_s_at	fibulin 2	3p25.1,	2199,		FBLN2,
242828_at, 239710_at, 238964_at	fidgetin	2q24.3,	55137,		fign,
205776_at	flavin containing monooxygenase 5	1q21.1,	2330,	hsa00982:Drug metabolism,	FMO5,
211074_at, 204437_s_at	folate receptor 1 (adult)	11q13.3-q14.1,	2348,		FOLR1,	?Congenital anomalies, susceptibility to,
215645_at	folliculin	17p11.2,	201163,	hsa05211:Renal cell carcinoma,	FLCN,	Birt-Hogg-Dube syndrome,Colorectal cancer, somatic,Pneumothorax, primary spontaneous,Renal carcinoma, chromophobe, somatic,
228250_at, 228768_at	folliculin interacting protein 1	5q23.3,5q31.1,	96459,		FNIP1,
237086_at, 204667_at	forkhead box A1	14q12-q13,	3169,		foxa1,
1553613_s_at	forkhead box C1	6p25,	2296,		FOXC1,	Anterior segment mesenchymal dysgenesis,Axenfeld anomaly,Axenfeld-Rieger syndrome, type 3,Iridogoniodysgenesis,Iridogoniodysgenesis, type 1,Iris hypoplasia and glaucoma,Rieger anomaly,Rieger or Axenfeld anomalies,
205022_s_at, 218031_s_at, 222494_at	forkhead box N3	14q31.3,	1112,		foxn3,
204131_s_at	forkhead box O3; forkhead box O3B pseudogene	17p11,6q21,	2309,2310,	hsa04062:Chemokine signaling pathway,hsa04722:Neurotrophin signaling pathway,hsa05213:Endometrial cancer,hsa05223:Non-small cell lung cancer,	FOXO3,foxo3b,	Genome-wide association analysis of susceptibility and clinical phenotype in multiple sclerosis,
205451_at	forkhead box O4	Xq13.1,	4303,		FOXO4,
223287_s_at	forkhead box P1	3p14.1,	27086,		FOXP1,
243278_at, 235201_at	forkhead box P2	7q31,	93986,		FOXP2,	Speech-language disorder-1,
239657_x_at	forkhead box protein O6	1p34.1,	100132074,		Foxo6,
220604_x_at, 224300_x_at	formiminotransferase cyclodeaminase	21q22.3,	10841,	hsa00340:Histidine metabolism,hsa00670:One carbon pool by folate,	ftcD,	Glutamate formiminotransferase deficiency,
230389_at, 212288_at, 230086_at, 213940_s_at	formin binding protein 1	9q34,	23048,		Fnbp1,
229272_at	formin binding protein 4	11p11.2,	23360,		FNBP4,
230201_at	fragile X mental retardation, autosomal homolog 1	3q28,	8087,		FXR1,
219889_at	frequently rearranged in advanced T-cell lymphomas	10q24.1,	10023,	hsa04310:Wnt signaling pathway,	FRAT1,
209864_at	frequently rearranged in advanced T-cell lymphomas 2	10q24.1,	23401,	hsa04310:Wnt signaling pathway,	Frat2,
238129_s_at, 210220_at	frizzled homolog 2 (Drosophila)	17q21.1,	2535,	hsa04310:Wnt signaling pathway,hsa04916:Melanogenesis,hsa05200:Pathways in cancer,hsa05210:Colorectal cancer,hsa05217:Basal cell carcinoma,	FZD2,
1559861_at	fructose-1,6-bisphosphatase 2	9q22.3,	8789,	hsa00010:Glycolysis / Gluconeogenesis,hsa00030:Pentose phosphate pathway,hsa00051:Fructose and mannose metabolism,hsa04910:Insulin signaling pathway,	FBP2,
226072_at	fucokinase	16q22.1,	197258,	hsa00051:Fructose and mannose metabolism,hsa00520:Amino sugar and nucleotide sugar metabolism,	FUK,
207178_s_at	fyn-related kinase	6q21-q22.3,	2444,		FRK,
230918_at	galactokinase 2	15q21.1,	2585,	hsa00052:Galactose metabolism,hsa00520:Amino sugar and nucleotide sugar metabolism,	Galk2,
234974_at, 235256_s_at	galactose mutarotase (aldose 1-epimerase)	2p22.1,	130589,	hsa00010:Glycolysis / Gluconeogenesis,	galM,
242734_x_at	galactose-1-phosphate uridylyltransferase	9p13,	2592,	hsa00052:Galactose metabolism,hsa00520:Amino sugar and nucleotide sugar metabolism,	galT,	Galactosemia,
206540_at	galactosidase, beta 1-like	2q35,	79411,		glb1l,
204417_at	galactosylceramidase	14q31,	2581,	hsa00600:Sphingolipid metabolism,hsa04142:Lysosome,	GALC,	Krabbe disease,
207010_at	gamma-aminobutyric acid (GABA) A receptor, beta 1	4p12,	2560,	hsa04080:Neuroactive ligand-receptor interaction,	GABRB1,
227690_at	gamma-aminobutyric acid (GABA) A receptor, beta 3	15q11.2-q12,	2562,	hsa04080:Neuroactive ligand-receptor interaction,	GABRB3,	Epilepsy, childhood absence, 5,Insomnia,
1568612_at, 206849_at	gamma-aminobutyric acid (GABA) A receptor, gamma 2	5q31.1-q33.1,	2566,	hsa04080:Neuroactive ligand-receptor interaction,	Gabrg2,	Epilepsy, childhood absence,Epilepsy, childhood absence, 2,Epilepsy, generalized, with febrile seizures plus,Epilepsy, generalized, with febrile seizures plus, type 3,Febrile convulsions, familial, 8,Myoclonic epilepsy, severe, of infancy,
236225_at	gamma-glutamyltransferase 6	17p13.2,	124975,	hsa00430:Taurine and hypotaurine metabolism,hsa00450:Selenoamino acid metabolism,hsa00460:Cyanoamino acid metabolism,hsa00480:Glutathione metabolism,hsa00590:Arachidonic acid metabolism,	GGT6,
201667_at	gap junction protein, alpha 1, 43kDa	6q21-q23.2,	2697,	hsa04540:Gap junction,hsa05412:Arrhythmogenic right ventricular cardiomyopathy (ARVC),	GJA1,	A Genome-Wide Association Study Identifies Protein Quantitative Trait Loci (pQTLs),Atrioventricular septal defect,Hypoplastic left heart syndrome,Oculodentodigital dysplasia,Oculodentodigital dysplasia, autosomal recessive,Syndactyly, type III,
219233_s_at	gasdermin B	17q12,	55876,		GSDMB,
200696_s_at	gelsolin (amyloidosis, Finnish type)	9q33,	2934,	hsa04666:Fc gamma R-mediated phagocytosis,hsa04810:Regulation of actin cytoskeleton,	Gsn,	Amyloidosis, Finnish type,
202321_at	geranylgeranyl diphosphate synthase 1	1q43,	9453,	hsa00900:Terpenoid backbone biosynthesis,	GGPS1,
218458_at	germ cell-less homolog 1 (Drosophila)-like; germ cell-less homolog 1 (Drosophila)	2p13.3,5q35.3,	64395,64396,		GMCL1,GMCL1L,
217807_s_at, 234339_s_at, 234918_at	glioma tumor suppressor candidate region gene 2; glioma tumor suppressor candidate region gene 2 pseudogene	15q26.2,19q13.3,	29997,440311,		GLTSCR2,LOC440311,
230360_at	gliomedin	15q21.2,	342035,		GLDN,
225706_at, 227525_at, 225700_at, 1560316_s_at	glucocorticoid induced transcript 1	7p21.3,	113263,		glcci1,
203676_at, 212335_at, 212334_at	glucosamine (N-acetyl)-6-sulfatase	12q14,	2799,	hsa00531:Glycosaminoglycan degradation,hsa04142:Lysosome,	GNS,	Mucopolysaccharidosis type IIID,Sanfilippo disease IIID,
205042_at	glucosamine (UDP-N-acetyl)-2-epimerase/N-acetylmannosamine kinase	9p13.3,	10020,	hsa00520:Amino sugar and nucleotide sugar metabolism,	gne,	Inclusion body myopathy, autosomal recessive,Nonaka myopathy,Sialuria,
213448_at	glucosidase, beta; acid (includes glucosylceramidase)	1q21,	2629,	hsa00511:Other glycan degradation,hsa00600:Sphingolipid metabolism,hsa04142:Lysosome,	GBA,	Gaucher disease, perinatal lethal,Gaucher disease, type I,Gaucher disease, type II,Gaucher disease, type III,Gaucher disease, type IIIC,
202605_at	glucuronidase, beta	7q21.11,	2990,	hsa00040:Pentose and glucuronate interconversions,hsa00500:Starch and sucrose metabolism,hsa00531:Glycosaminoglycan degradation,hsa00860:Porphyrin and chlorophyll metabolism,hsa00983:Drug metabolism,hsa04142:Lysosome,	GUSB,	Mucopolysaccharidosis VII,
215043_s_at, 215599_at	glucuronidase, beta pseudogene	5q13,	11039,		SMA4,
232889_at	glucuronidase, beta pseudogene; glucuronidase, beta pseudogene 1	5q13.2,	153561,653188,		GUSBP3,
200648_s_at, 215001_s_at, 217202_s_at	glutamate-ammonia ligase (glutamine synthetase)	1q31,	2752,	hsa00250:Alanine, aspartate and glutamate metabolism,hsa00330:Arginine and proline metabolism,hsa00910:Nitrogen metabolism,	GLUL,	Glutamine deficiency, congenital,
203159_at, 203157_s_at, 203158_s_at	glutaminase	2q32-q34,	2744,	hsa00250:Alanine, aspartate and glutamate metabolism,hsa00330:Arginine and proline metabolism,hsa00471:D-Glutamine and D-glutamate metabolism,hsa00910:Nitrogen metabolism,	GLS,
217846_at	glutaminyl-tRNA synthetase	3p21.3-p21.1,	5859,	hsa00970:Aminoacyl-tRNA biosynthesis,	QARS,
209276_s_at	glutaredoxin (thioltransferase)	5q14,	2745,		GLRX,
202967_at, 235405_at	glutathione S-transferase alpha 4	6p12.1,	2941,	hsa00480:Glutathione metabolism,hsa00980:Metabolism of xenobiotics by cytochrome P450,hsa00982:Drug metabolism,	GSTA4,
217751_at	glutathione S-transferase kappa 1	7q35,	373156,	hsa00480:Glutathione metabolism,hsa00980:Metabolism of xenobiotics by cytochrome P450,hsa00982:Drug metabolism,	gstk1,
202554_s_at	glutathione S-transferase mu 3 (brain)	1p13.3,	2947,	hsa00480:Glutathione metabolism,hsa00980:Metabolism of xenobiotics by cytochrome P450,hsa00982:Drug metabolism,	GSTM3,
204149_s_at	glutathione S-transferase mu 4	1p13.3,	2948,	hsa00480:Glutathione metabolism,hsa00980:Metabolism of xenobiotics by cytochrome P450,hsa00982:Drug metabolism,	GSTM4,
200824_at	glutathione S-transferase pi 1	11q13,	2950,	hsa00480:Glutathione metabolism,hsa00980:Metabolism of xenobiotics by cytochrome P450,hsa00982:Drug metabolism,hsa05200:Pathways in cancer,hsa05215:Prostate cancer,	GSTP1,
214091_s_at, 201348_at	glutathione peroxidase 3 (plasma)	5q23,	2878,	hsa00480:Glutathione metabolism,hsa00590:Arachidonic acid metabolism,	gpX3,
201106_at	glutathione peroxidase 4 (phospholipid hydroperoxidase)	19p13.3,	2879,	hsa00480:Glutathione metabolism,hsa00590:Arachidonic acid metabolism,	GPX4,
228141_at, 227628_at	glutathione peroxidase 8 (putative)	5q11.2,	493869,		Gpx8,
209531_at	glutathione transferase zeta 1	14q24.3,	2954,	hsa00350:Tyrosine metabolism,hsa00480:Glutathione metabolism,hsa00980:Metabolism of xenobiotics by cytochrome P450,hsa00982:Drug metabolism,	Gstz1,	Tyrosinemia, type Ib,
226806_s_at, 230958_s_at	glyceronephosphate O-acyltransferase	1q42,	8443,	hsa00564:Glycerophospholipid metabolism,	GNPAT,	Chondrodysplasia punctata, rhizomelic, type 2,
238681_at	glycerophosphodiester phosphodiesterase domain containing 1	17q22,	284161,		gdpd1,
203178_at	glycine amidinotransferase (L-arginine:glycine amidinotransferase)	15q21.1,	2628,	hsa00260:Glycine, serine and threonine metabolism,hsa00330:Arginine and proline metabolism,	gatm,	AGAT deficiency,
205280_at	glycine receptor, beta	4q31.3,	2743,	hsa04080:Neuroactive ligand-receptor interaction,	GLRB,	Hyperekplexia, autosomal recessive,
219267_at, 226177_at	glycolipid transfer protein; glycolipid transfer protein pseudogene 1	11p15.1,12q24.11,	51228,645312,		gltP,GLTPP1,
1554018_at, 201141_at	glycoprotein (transmembrane) nmb	7p15,	10457,		GPNMB,
227070_at	glycosyltransferase 8 domain containing 2	12q,	83468,		GLT8D2,
236862_at	golgi associated PDZ and coiled-coil motif containing	6q21,	57120,		GOPC,
208914_at	golgi associated, gamma adaptin ear containing, ARF binding protein 2	16p12,	23062,	hsa04142:Lysosome,	Gga2,
203384_s_at, 228174_at	golgi autoantigen, golgin subfamily a, 1	9q33.3,	2800,		Golga1,
35436_at	golgi autoantigen, golgin subfamily a, 2	9q34.11,	2801,		GOLGA2,
233198_at	golgi autoantigen, golgin subfamily a, 2-like 1	12q23.1,	55592,		GOLGA2B,
213212_x_at	golgi autoantigen, golgin subfamily a-like pseudogene	15q25.2,	374650,		GOLGA6L5,
218361_at	golgi phosphoprotein 3-like	1q21.2,	55204,		Golph3l,
201056_at	golgin B1, golgi integral membrane protein	3q13,	2804,		GOLGB1,
222830_at	grainyhead-like 1 (Drosophila)	2p25.1,	29841,		GRHL1,
203765_at	grancalcin, EF-hand calcium binding protein	2q24.2,	25801,		Gca,
216041_x_at, 211284_s_at, 200678_x_at	granulin	17q21.32,	2896,		grn,	Frontotemporal dementia, ubiquitin-positive,Frontotemporal lobar degeneration with ubiquitin-positive inclusions,
207574_s_at, 209304_x_at, 209305_s_at	growth arrest and DNA-damage-inducible, beta	19p13.3,	4616,	hsa04010:MAPK signaling pathway,hsa04110:Cell cycle,hsa04115:p53 signaling pathway,	Gadd45b,
204121_at	growth arrest and DNA-damage-inducible, gamma	9q22.1-q22.2,	10912,	hsa04010:MAPK signaling pathway,hsa04110:Cell cycle,hsa04115:p53 signaling pathway,	Gadd45g,	A Genome-Wide Association Study Identifies Protein Quantitative Trait Loci (pQTLs),
210761_s_at	growth factor receptor-bound protein 7	17q12,	2886,		Grb7,
1554771_at	guanidinoacetate N-methyltransferase pseudogene	2q37.1,	391491,		GAMTP1,
202748_at	guanylate binding protein 2, interferon-inducible	1p22.2,	2634,		GBP2,
223434_at	guanylate binding protein 3	1p22.2,	2635,		GBP3,
220506_at	guanylate cyclase 1, soluble, beta 2	13q14.2-q14.3,	2974,		GUCY1B2,
235528_at	guanylate cyclase activator 1B (retina)	6p21.1,	2979,	hsa04740:Olfactory transduction,	GUCA1B,
230529_at, 218603_at	headcase homolog (Drosophila)	6q23-q24,	51696,		Heca,
221667_s_at	heat shock 22kDa protein 8	12q24.23,	26353,		HSPB8,	Charcot-Marie-Tooth disease, axonal, type 2L,Neuropathy, distal hereditary motor, type II,Neuropathy, distal hereditary motor, type IIA,
201841_s_at	heat shock 27kDa protein-like 2 pseudogene; heat shock 27kDa protein 1	7q11.23,9q21.13,	3315,653553,	hsa04010:MAPK signaling pathway,hsa04370:VEGF signaling pathway,	Hspb1,HSPBL2,	Charcot-Marie-Tooth disease, axonal, type 2F,Neuropathy, distal hereditary motor, type IIB,
203790_s_at	heat-responsive protein 12	8q22,	10247,		Hrsp12,
219863_at	hect domain and RLD 5	4q22.1,	51191,		HERC5,
219352_at	hect domain and RLD 6	4q22.1,	55008,		herc6,
225910_at	helicase with zinc finger	17q24.2,	9931,		helz,
203665_at	heme oxygenase (decycling) 1	22q12,22q12|22q13.1,	3162,	hsa00860:Porphyrin and chlorophyll metabolism,	hmox1,	Heme oxygenase-1 deficiency,Pulmonary disease, chronic obstructive, susceptibility to,
214647_s_at, 211330_s_at	hemochromatosis	6p21.3,	3077,		HFE,	Alzheimer disease, susceptibility to,Hemochromatosis,Microvascular complications of diabetes 7,Porphyria cutanea tarda, susceptibility to,Porphyria variegata,Porphyria variegata, susceptibility to,Transferrin serum level QTL,Variants in TF and HFE explain approximately 40% of genetic variation in serum-transferrin levels,
213359_at	heterogeneous nuclear ribonucleoprotein D (AU-rich element RNA binding protein 1, 37kDa)	4q21.1-q21.2,	3184,		HNRNPD,
214188_at	hexamethylene bis-acetamide inducible 1	17q21.31,	10614,		Hexim1,
238547_at, 243796_at	hexamthylene bis-acetamide inducible 2	17q21.31,	124790,		Hexim2,
215155_at	hexosaminidase A (alpha polypeptide)	15q23-q24,	3073,	hsa00511:Other glycan degradation,hsa00520:Amino sugar and nucleotide sugar metabolism,hsa00531:Glycosaminoglycan degradation,hsa00603:Glycosphingolipid biosynthesis,hsa00604:Glycosphingolipid biosynthesis,hsa04142:Lysosome,	hexA,	GM2-gangliosidosis, several forms,Hex A pseudodeficiency,Tay-Sachs disease,
210719_s_at	high-mobility group 20B	19p13.3,	10362,		Hmg20b,
243368_at	high-mobility group box 2	4q31,	3148,		HMGB2,
228772_at	histamine N-methyltransferase	2q22.1,	3176,	hsa00340:Histidine metabolism,	HNMT,	Asthma, susceptibility to,
235496_at	histidine rich carboxyl terminus 1	9p13.3,	646962,		Hrct1,
224415_s_at	histidine triad nucleotide binding protein 2	9p13.3,	84681,		HINT2,
228697_at, 226537_at	histidine triad nucleotide binding protein 3	6q22.32,	135114,		HINT3,
209398_at	histone cluster 1, H1c	6p21.3,	3006,		Hist1h1c,
215071_s_at	histone cluster 1, H2ac	6p21.3,	8334,	hsa05322:Systemic lupus erythematosus,	Hist1h2ac,
214469_at	histone cluster 1, H2ae; histone cluster 1, H2ab	6p21.3,6p22.2-p21.1,	3012,8335,	hsa05322:Systemic lupus erythematosus,	Hist1h2ab,Hist1h2ae,
207156_at, 214481_at, 239041_at	histone cluster 1, H2ag; histone cluster 1, H2ah; histone cluster 1, H2ai; histone cluster 1, H2ak; histone cluster 1, H2al; histone cluster 1, H2am	6p21.33,6p22-p21.3,6p22.1,	8329,8330,8332,8336,85235,8969,	hsa05322:Systemic lupus erythematosus,	Hist1h2ag,Hist1h2ah,Hist1h2ai,Hist1h2ak,HIST1H2AL,HIST1H2AM,
209911_x_at, 222067_x_at	histone cluster 1, H2bd	6p21.3,	3017,	hsa05322:Systemic lupus erythematosus,	HIST1H2BD,
215779_s_at, 236193_at, 210387_at	histone cluster 1, H2bi; histone cluster 1, H2bg; histone cluster 1, H2be; histone cluster 1, H2bf; histone cluster 1, H2bc	6p21.3,	8339,8343,8344,8346,8347,	hsa05322:Systemic lupus erythematosus,	Hist1h2bc,HIST1H2BE,HIST1H2BF,HIST1H2BG,HIST1H2BI,
209806_at	histone cluster 1, H2bk	6p21.33,	85236,	hsa05322:Systemic lupus erythematosus,	HIST1H2BK,
214472_at, 206110_at	histone cluster 1, H3j; histone cluster 1, H3i; histone cluster 1, H3h; histone cluster 1, H3g; histone cluster 1, H3f; histone cluster 1, H3e; histone cluster 1, H3d; histone cluster 1, H3c; histone cluster 1, H3b; histone cluster 1, H3a; histone cluster 1, H2ad; histone cluster 2, H3a; histone cluster 2, H3c; histone cluster 2, H3d	1q21.2,6p21.3,6p22-p21.3,6p22.1,	126961,3013,333932,653604,8350,8351,8352,8353,8354,8355,8356,8357,8358,8968,	hsa05322:Systemic lupus erythematosus,	Hist1h2ad,HIST1H3A,HIST1H3B,HIST1H3C,HIST1H3D,HIST1H3E,HIST1H3F,hist1h3g,HIST1H3H,Hist1h3i,HIST1H3J,HIST2H3A,hist2h3c,HIST2H3D,
208181_at, 205967_at, 208180_s_at	histone cluster 1, H4l; histone cluster 1, H4k; histone cluster 4, H4; histone cluster 1, H4h; histone cluster 1, H4j; histone cluster 1, H4i; histone cluster 1, H4d; histone cluster 1, H4c; histone cluster 1, H4f; histone cluster 1, H4e; histone cluster 1, H4b; histone cluster 1, H4a; histone cluster 2, H4a; histone cluster 2, H4b	12p12.3,1q21,6p21.3,6p21.33,6p22-p21.3,	121504,554313,8294,8359,8360,8361,8362,8363,8364,8365,8366,8367,8368,8370,	hsa05322:Systemic lupus erythematosus,	Hist1h4a,Hist1h4b,Hist1h4c,Hist1h4d,HIST1H4E,Hist1h4f,Hist1h4h,Hist1h4i,Hist1h4j,Hist1h4k,hist1h4l,HIST2H4A,HIST2H4B,Hist4h4,
227943_at	histone cluster 2, H2aa3; histone cluster 2, H2aa4	1q21.2,	723790,8337,	hsa05322:Systemic lupus erythematosus,	HIST2H2AA3,HIST2H2AA4,
202708_s_at	histone cluster 2, H2be	1q21-q23,	8349,	hsa05322:Systemic lupus erythematosus,	HIST2H2BE,
221582_at, 231681_x_at	histone cluster 3, H2a	1q42.13,	92815,	hsa05322:Systemic lupus erythematosus,	Hist3h2a,
227679_at	histone deacetylase 11	3p25.1,	79885,		HDAC11,
202455_at	histone deacetylase 5	17q21,	10014,		HDAC5,
213844_at	homeobox A5	7p15-p14,	3202,		HOXA5,
214651_s_at	homeobox A9	7p15-p14,	3205,		HOXA9,
237189_at	homeobox B2	17q21-q22,	3212,		HOXB2,
205601_s_at	homeobox B5	17q21.3,	3215,		hoxb5,
205366_s_at	homeobox B6	17q21.3,	3216,		HOXB6,
206858_s_at, 206194_at	homeobox C4	12q13.3,	3221,		HOXC4,
217168_s_at	homocysteine-inducible, endoplasmic reticulum stress-inducible, ubiquitin-like domain member 1	16q12.2-q13,	9709,		HERPUD1,
45714_at, 218537_at	host cell factor C1 regulator 1 (XPO1 dependent)	16p13.3,	54985,		HCFC1R1,
209709_s_at, 207165_at	hyaluronan-mediated motility receptor (RHAMM)	5q33.2-qter,	3161,	hsa04512:ECM-receptor interaction,	HMMR,	Breast cancer, susceptibility to,
217989_at	hydroxysteroid (17-beta) dehydrogenase 11	4q22.1,	51170,		HSD17B11,
201413_at	hydroxysteroid (17-beta) dehydrogenase 4	5q21,	3295,	hsa00120:Primary bile acid biosynthesis,	hsd17b4,	D-bifunctional protein deficiency,
220081_x_at	hydroxysteroid (17-beta) dehydrogenase 7	1q23,	51478,	hsa00100:Steroid biosynthesis,hsa00140:Steroid hormone biosynthesis,hsa00150:Androgen and estrogen metabolism,	hsd17b7,
244075_at	hydroxysteroid (17-beta) dehydrogenase 7 pseudogene 2	10p11.21,	158160,		HSD17B7P2,
228741_s_at	hyperpolarization activated cyclic nucleotide-gated potassium channel 3	1q22,	57657,		Hcn3,
1553145_at	hypothetical FLJ39653	4p15.32,	202020,		FLJ39653,
202807_s_at	hypothetical LOC100128526; target of myb1 (chicken)	22q12.3,22q13.1,	100128526,10043,		LOC100128526,TOM1,
235174_s_at	hypothetical LOC100128822	7q36.1,	100128822,		LOC100128822,
238015_at	hypothetical LOC100129478; chromosome 4 open reading frame 46	16p13.3,4q32.1,	100129478,201725,		C4orf46,LOC100129478,
229699_at	hypothetical LOC100129550	3q21.1,	100129550,		LOC100129550,
202844_s_at	hypothetical LOC100129773; ralA binding protein 1	18p11.22,18p11.3,	100129773,10928,	hsa05200:Pathways in cancer,hsa05212:Pancreatic cancer,	LOC100129773,RALBP1,
241376_at	hypothetical LOC100130097	1q44,	100130097,		LOC100130097,
243179_at, 244570_at	hypothetical LOC100130360	6p22.3,	100130360,		LOC100130360,
1554741_s_at	hypothetical LOC100132771; fibroblast growth factor 7 (keratinocyte growth factor); fibroblast growth factor 7 pseudogene 2	15q15-q21.1,21q11.2,9p11.2,	100132771,2252,394217,	hsa04010:MAPK signaling pathway,hsa04810:Regulation of actin cytoskeleton,hsa05200:Pathways in cancer,hsa05218:Melanoma,	Fgf7,FGF7P2,LOC100132771,
213826_s_at	hypothetical LOC100133109	2q31.1,	100133109,		LOC100133109,
229685_at	hypothetical LOC100134937	4,	100134937,		LOC100134937,
226809_at	hypothetical LOC100216479		100216479,		LOC100216479,
1561666_a_at	hypothetical LOC114796	7p22.3,	114796,		KIAA1908,
243309_at	hypothetical LOC145788	15q21.3,	145788,		FLJ27352,
235014_at	hypothetical LOC147727	19p13.2,	147727,		LOC147727,
232645_at	hypothetical LOC153684	5p12,	153684,		LOC153684,
231828_at, 1555892_s_at	hypothetical LOC253039	9q33.2,	253039,		LOC253039,
233092_s_at	hypothetical LOC26080	13,	26080,		LOC26080,
226382_at	hypothetical LOC283070	10p14,	283070,		LOC283070,
1555363_s_at	hypothetical LOC284440	19p13.11,	284440,		LOC284440,
1553634_a_at	hypothetical LOC285962	7q34,	285962,		FLJ40852,
229722_at	hypothetical LOC29075	20p11.23,	29075,		HSPC072,
228702_at	hypothetical LOC378805	7q32.3,	378805,		FLJ43663,
229243_at	hypothetical LOC387790	11q13.5,	387790,		LOC387790,
230136_at	hypothetical LOC400099	13q12.11,	400099,		LOC400099,
226924_at	hypothetical LOC400657	18q22.3,	400657,		LOC400657,
244359_s_at, 244114_x_at, 244532_x_at	hypothetical LOC401131	1q12,	401131,		LOC401131,
1558212_at	hypothetical LOC401491	9p24.2,	401491,		FLJ35024,
240247_at	hypothetical LOC440261	15q13.2,	440261,		MGC131512,
241835_at	hypothetical LOC440570	1p36.13,	440570,		LOC440570,
1557293_at	hypothetical LOC440993	3q29,	440993,		LOC440993,
229623_at	hypothetical LOC441027	4q21.22,	441027,		Tmem150c,
243009_at	hypothetical LOC441242	7q11.21,	441242,		LOC441242,
225028_at	hypothetical LOC550643	Xp11.1,	550643,		LOC550643,
214295_at	hypothetical LOC57235		57235,		KIAA0485,
1559957_a_at	hypothetical LOC642852	21q22.3,	642852,		LOC642852,
232744_x_at	hypothetical LOC644949	15q15.1,	644949,		LOC644949,
235124_at	hypothetical LOC645212	15q15.3,	645212,		LOC645212,
230272_at, 238850_at	hypothetical LOC645323; microRNA 9-2	5q14.3,	407047,645323,		LOC645323,Mir9-2,
226419_s_at	hypothetical LOC645460	17q22,	645460,		FLJ44342,
239556_at	hypothetical LOC645513	4q26-q27,	645513,		LOC645513,
230312_at	hypothetical LOC645566	7,	645566,		FLJ45482,
1555216_a_at	hypothetical LOC645722	17q23.2,	645722,		LOC645722,
1569040_s_at	hypothetical LOC645784	2p11.2,	645784,		FLJ40330,
1568597_at	hypothetical LOC646762	7p15.1,	646762,		LOC646762,
1558444_at	hypothetical LOC727788	1q12,	727788,		LOC727788,
235422_at	hypothetical LOC727804	17q24.2,	727804,		LOC727804,
239241_at	hypothetical LOC727869	11q22.2,	727869,		LOC727869,
229678_at	hypothetical LOC728431	1p34.3,	728431,		LOC728431,
242313_at	hypothetical LOC728730	2p22.1,	728730,		LOC728730,
203304_at	hypothetical LOC729590; BMP and activin membrane-bound inhibitor homolog (Xenopus laevis)	10p11.23,10p12.3-p11.2,	25805,729590,		BAMBI,LOC729590,
213248_at	hypothetical LOC730101	6p12.1,	730101,		LOC730101,
238529_at, 230738_at	hypothetical LOC730631	1q21.2,	730631,		LOC730631,
230587_at	hypothetical STGC3		474171,		STGC3,
215318_at	hypothetical gene CG012	13q12-q13,	116829,		CG012,
227298_at	hypothetical gene supported by AK095117	6p12.3,	401264,		FLJ37798,
241405_at	hypothetical gene supported by BC039664	17q21.33,	400604,		LOC400604,
235482_at	hypothetical gene supported by BC040598	2p14,	400960,		LOC400960,
1558345_a_at	hypothetical gene supported by NM_194304	10q11.21,	439911,		LOC439911,
229227_at, 1557063_at	hypothetical locus FLJ45244	14q32.13,	400242,		FLJ45244,
1554520_at	hypothetical locus LOC283861	16q24.3,	283861,		LOC283861,
231024_at	hypothetical locus LOC572558	9q13,	572558,		LOC572558,
1569453_a_at	hypothetical locus LOC692247	11p15.5,	692247,		LOC692247,
1558685_a_at	hypothetical protein BC009467	Xq28,	158960,		LOC158960,
213546_at	hypothetical protein DKFZp586I1420	7p15.1,	222161,		DKFZP586I1420,
205510_s_at	hypothetical protein FLJ10038	15q15.3,	55056,		FLJ10038,
58780_s_at, 220326_s_at	hypothetical protein FLJ10357	14q11.2,	55701,		FLJ10357,
214101_s_at	hypothetical protein FLJ11822; aminopeptidase puromycin sensitive	17q12,17q21,	440434,9520,		LOC440434,npepps,
226485_at, 220137_at	hypothetical protein FLJ20674	12q24.23,	54621,		VSIG10,
228647_at	hypothetical protein LOC100049716	12p13.33,	100049716,		LOC100049716,
1559045_at	hypothetical protein LOC100128288	17p13.1,	100128288,		LOC100128288,
236656_s_at	hypothetical protein LOC100130506	2,	100130506,		LOC100130506,
227074_at	hypothetical protein LOC100131564	1p22.1,	100131564,		LOC100131564,
201951_at, 201952_at	hypothetical protein LOC100133690; activated leukocyte cell adhesion molecule	3,3q13.1,	100133690,214,	hsa04514:Cell adhesion molecules (CAMs),	Alcam,LOC100133690,
222387_s_at	hypothetical protein LOC100133770; vacuolar protein sorting 35 homolog (S. cerevisiae)	16q12,7,	100133770,55737,		LOC100133770,Vps35,
229737_at	hypothetical protein LOC100134123	6,	100134123,		LOC100134123,
212390_at, 213388_at	hypothetical protein LOC100134230; similar to KIAA0454 protein; similar to phosphodiesterase 4D interacting protein isoform 2; phosphodiesterase 4D interacting protein	1,1q12,	100134230,652164,727927,9659,		LOC100134230,LOC652164,LOC727927,PDE4DIP,
1564139_at	hypothetical protein LOC144571	12p13.31,	144571,		LOC144571,
213703_at	hypothetical protein LOC150759	2q11.2,	150759,		LOC150759,
232794_at	hypothetical protein LOC153682	5p13.1,	153682,		LOC153682,
213195_at, 1560703_at	hypothetical protein LOC201229	17q11.2,	201229,		c17orf108,
236037_at, 228051_at	hypothetical protein LOC202451	6q23.3,	202451,
235587_at	hypothetical protein LOC202781	7q36.2,	202781,		LOC202781,
235132_at	hypothetical protein LOC254128	2q14.2,	254128,		LOC254128,
1555865_at	hypothetical protein LOC255512	11p15.5,	255512,		LOC255512,
236076_at	hypothetical protein LOC257396	5q11.2,	257396,		LOC257396,
222307_at	hypothetical protein LOC282997	10q25.2,	282997,		LOC282997,
235151_at	hypothetical protein LOC283357	12p13.33,	283357,		LOC283357,
229552_at	hypothetical protein LOC283454	12q24.23,	283454,		LOC283454,
230351_at	hypothetical protein LOC283481	13q33.1,	283481,		LOC283481,
1561433_at	hypothetical protein LOC285103	2q21.2,	285103,		LOC285103,
236321_at	hypothetical protein LOC285550	4p15.33-p15.32,	285550,		FAM200B,
238536_at	hypothetical protein LOC286272	9q12,	286272,		LOC286272,
227940_at	hypothetical protein LOC339803	2p16.1,	339803,		LOC339803,
230388_s_at	hypothetical protein LOC644246	17q21.31,	644246,		LOC644246,
238039_at	hypothetical protein LOC728769	5q14.1,	728769,		LOC728769,
235010_at	hypothetical protein LOC729013	11p15.3,	729013,		LOC729013,
1556180_at	hypothetical protein LOC729678	5q35.3,	729678,		LOC729678,
230780_at	hypothetical protein LOC730091	3q25.31,	730091,		LOC730091,
226842_at	hypothetical protein LOC90110	17q21.2,	90110,		LOC90110,
228235_at	hypothetical protein MGC16121	Xq26.3,	84848,		MGC16121,
205059_s_at	iduronidase, alpha-L-	4p16.3,	3425,	hsa00531:Glycosaminoglycan degradation,hsa04142:Lysosome,	Idua,	Mucopolysaccharidosis Ih,Mucopolysaccharidosis Ih/s,Mucopolysaccharidosis Is,
227870_at	immunoglobulin superfamily, DCC subclass, member 4	15q22.31,	57722,		IGDCC4,
205258_at	inhibin, beta B	2cen-q13,	3625,	hsa04060:Cytokine-cytokine receptor interaction,hsa04350:TGF-beta signaling pathway,	Inhbb,
207688_s_at	inhibin, beta C	12q13.1,	3626,	hsa04060:Cytokine-cytokine receptor interaction,hsa04350:TGF-beta signaling pathway,	INHBC,
213931_at, 201565_s_at, 201566_x_at	inhibitor of DNA binding 2, dominant negative helix-loop-helix protein	2p25,	3398,	hsa04350:TGF-beta signaling pathway,	ID2,
207826_s_at	inhibitor of DNA binding 3, dominant negative helix-loop-helix protein	1p36.13-p36.12,	3399,	hsa04350:TGF-beta signaling pathway,	Id3,
218234_at, 48825_at	inhibitor of growth family, member 4	12p13.31,	51147,		Ing4,
209341_s_at	inhibitor of kappa light polypeptide gene enhancer in B-cells, kinase beta	8p11.2,	3551,	hsa04010:MAPK signaling pathway,hsa04062:Chemokine signaling pathway,hsa04210:Apoptosis,hsa04620:Toll-like receptor signaling pathway,hsa04621:NOD-like receptor signaling pathway,hsa04622:RIG-I-like receptor signaling pathway,hsa04623:Cytosolic DNA-sensing pathway,hsa04660:T cell receptor signaling pathway,hsa04662:B cell receptor signaling pathway,hsa04722:Neurotrophin signaling pathway,hsa04910…	IKBKB,
242787_at	inner centromere protein antigens 135/155kDa	11q12-q13,	3619,		INCENP,
240458_at, 244457_at, 216614_at	inositol 1,4,5-triphosphate receptor, type 2	12p11,	3709,	hsa04020:Calcium signaling pathway,hsa04070:Phosphatidylinositol signaling system,hsa04114:Oocyte meiosis,hsa04270:Vascular smooth muscle contraction,hsa04540:Gap junction,hsa04720:Long-term potentiation,hsa04730:Long-term depression,hsa04912:GnRH signaling pathway,hsa05010:Alzheimer's disease,	ITPR2,	ITPR2 as a susceptibility gene in sporadic amyotrophic lateral sclerosis: a genome-wide association study,
203723_at	inositol 1,4,5-trisphosphate 3-kinase B	1q42.13,	3707,	hsa00562:Inositol phosphate metabolism,hsa04020:Calcium signaling pathway,hsa04070:Phosphatidylinositol signaling system,	Itpkb,
223165_s_at	inositol hexakisphosphate kinase 2	3p21.31,	51447,		ip6k2,
213804_at, 213643_s_at	inositol polyphosphate-5-phosphatase, 75kDa	1p34,	3633,	hsa00562:Inositol phosphate metabolism,hsa04070:Phosphatidylinositol signaling system,	INPP5B,
203126_at	inositol(myo)-1(or 4)-monophosphatase 2	18p11.2,	3613,	hsa00562:Inositol phosphate metabolism,hsa04070:Phosphatidylinositol signaling system,	Impa2,	A genome-wide genotyping study in patients with ischaemic stroke: initial analysis and data release,
227432_s_at, 213792_s_at, 226450_at, 226212_s_at	insulin receptor	19p13.3-p13.2,	3643,	hsa04520:Adherens junction,hsa04910:Insulin signaling pathway,hsa04930:Type II diabetes mellitus,hsa04960:Aldosterone-regulated sodium reabsorption,	INSR,	Diabetes mellitus, insulin-resistant, with acanthosis nigricans,Hyperinsulinemic hypoglycemia, familial, 5,Leprechaunism,Rabson-Mendenhall syndrome,
242979_at	insulin receptor substrate 1	2q36,	3667,	hsa04722:Neurotrophin signaling pathway,hsa04910:Insulin signaling pathway,hsa04920:Adipocytokine signaling pathway,hsa04930:Type II diabetes mellitus,hsa04960:Aldosterone-regulated sodium reabsorption,	IRS1,	Coronary artery disease, susceptibility to,Diabetes mellitus, noninsulin-dependent,
209184_s_at, 209185_s_at	insulin receptor substrate 2	13q34,	8660,	hsa04722:Neurotrophin signaling pathway,hsa04910:Insulin signaling pathway,hsa04920:Adipocytokine signaling pathway,hsa04930:Type II diabetes mellitus,hsa04960:Aldosterone-regulated sodium reabsorption,	irs2,	Diabetes mellitus, noninsulin-dependent,{Diabetes mellitus, noninsulin-dependent,
203628_at, 203627_at, 225330_at	insulin-like growth factor 1 receptor	15q26.3,	3480,	hsa04114:Oocyte meiosis,hsa04144:Endocytosis,hsa04510:Focal adhesion,hsa04520:Adherens junction,hsa04730:Long-term depression,hsa04914:Progesterone-mediated oocyte maturation,hsa05200:Pathways in cancer,hsa05210:Colorectal cancer,hsa05214:Glioma,hsa05215:Prostate cancer,hsa05218:Melanoma,	IGF1R,	Insulin-like growth factor I, resistance to,Intrauterine and postnatal growth retardation,
212143_s_at, 210095_s_at	insulin-like growth factor binding protein 3	7p13-p12,	3486,	hsa04115:p53 signaling pathway,	igfbp3,
236929_at, 242202_at	integrator complex subunit 4	11q14.1,	92105,		INTS4,
1557118_a_at	integrator complex subunit 6	13q14.12-q14.2,	26512,		INTS6,	Nonsmall cell lung cancer,
206766_at	integrin, alpha 10	1q21,	8515,	hsa04510:Focal adhesion,hsa04512:ECM-receptor interaction,hsa04810:Regulation of actin cytoskeleton,hsa05410:Hypertrophic cardiomyopathy (HCM),hsa05412:Arrhythmogenic right ventricular cardiomyopathy (ARVC),hsa05414:Dilated cardiomyopathy,	ITGA10,
204191_at, 236478_at	interferon (alpha, beta and omega) receptor 1	21q22.1,21q22.1|21q22.11,	3454,	hsa04060:Cytokine-cytokine receptor interaction,hsa04620:Toll-like receptor signaling pathway,hsa04630:Jak-STAT signaling pathway,hsa04650:Natural killer cell mediated cytotoxicity,	IFNAR1,
242903_at	interferon gamma receptor 1	6q23.3,	3459,	hsa04060:Cytokine-cytokine receptor interaction,hsa04630:Jak-STAT signaling pathway,hsa04650:Natural killer cell mediated cytotoxicity,	IFNGR1,	BCG infection, generalized familial,H. pylori infection, susceptibility to,Mycobacterial infection, atypical, familial disseminated,Mycobacterium tuberculosis infection, protection against,Tuberculosis, susceptibility to,
214022_s_at, 201601_x_at	interferon induced transmembrane protein 1 (9-27)	11p15.5,	8519,	hsa04662:B cell receptor signaling pathway,	Ifitm1,
201315_x_at	interferon induced transmembrane protein 2 (1-8D)	11p15.5,	10581,		Ifitm2,
212203_x_at	interferon induced transmembrane protein 3 (1-8U)	11p15.5,	10410,		ifitm3,
1555464_at, 219209_at	interferon induced with helicase C domain 1	2q24,	64135,	hsa04622:RIG-I-like receptor signaling pathway,	IFIH1,	Diabetes mellitus, insulin-dependent, susceptibility to,Graves disease, susceptibility to,Robust associations of four new chromosome regions from genome-wide analyses of type 1 diabetes,
202531_at	interferon regulatory factor 1	5q31.1,	3659,		Irf1,	Gastric cancer,Macrocytic anemia, refractory, of 5q- syndrome,Myelodysplastic syndrome, preleukemic,Myelogenous leukemia, acute,Nonsmall cell lung cancer,
203275_at	interferon regulatory factor 2	4q34.1-q35.1,	3660,		irf2,
208436_s_at	interferon regulatory factor 7	11p15.5,	3665,	hsa04620:Toll-like receptor signaling pathway,hsa04622:RIG-I-like receptor signaling pathway,hsa04623:Cytosolic DNA-sensing pathway,	IRF7,
203882_at	interferon regulatory factor 9	14q11.2,	10379,	hsa04630:Jak-STAT signaling pathway,	IRF9,
202411_at	interferon, alpha-inducible protein 27	14q32,	3429,		IFI27,
204415_at	interferon, alpha-inducible protein 6	1p35,	2537,		IFI6,
206332_s_at, 208966_x_at, 208965_s_at	interferon, gamma-inducible protein 16	1q22,	3428,		IFI16,
214059_at, 214453_s_at	interferon-induced protein 44	1p31.1,	10561,		IFI44,
204439_at	interferon-induced protein 44-like	1p31.1,	10964,		IFI44L,
203153_at	interferon-induced protein with tetratricopeptide repeats 1	10q25-q26,	3434,		IFIT1,
226757_at, 217502_at	interferon-induced protein with tetratricopeptide repeats 2	10q23-q25,	3433,		Ifit2,
204747_at, 229450_at	interferon-induced protein with tetratricopeptide repeats 3	10q24,	3437,		Ifit3,
205992_s_at	interleukin 15	4q31,	3600,	hsa04060:Cytokine-cytokine receptor interaction,hsa04630:Jak-STAT signaling pathway,hsa04672:Intestinal immune network for IgA production,	IL15,
227997_at	interleukin 17 receptor D	3p14.3,	54756,		IL17RD,
206295_at	interleukin 18 (interferon-gamma-inducing factor)	11q22.2-q22.3,	3606,	hsa04060:Cytokine-cytokine receptor interaction,hsa04621:NOD-like receptor signaling pathway,hsa04623:Cytosolic DNA-sensing pathway,	IL18,	A Genome-Wide Association Study Identifies Protein Quantitative Trait Loci (pQTLs),
206693_at	interleukin 7	8q12-q13,	3574,	hsa04060:Cytokine-cytokine receptor interaction,hsa04630:Jak-STAT signaling pathway,hsa04640:Hematopoietic cell lineage,	Il7,
1557174_a_at	interleukin-1 receptor-associated kinase 1 binding protein 1	6q14-q15,	134728,		irak1bp1,
204569_at	intestinal cell (MAK-like) kinase	6p12.1,	22858,		ICK,	Endocrine-cerebroosteodysplasia,
219843_at, 1554740_a_at, 241393_at	intracisternal A particle-promoted polypeptide	1p34-p32,	3652,		ipp,
226324_s_at	intraflagellar transport 172 homolog (Chlamydomonas)	2p23.3,	26160,		IFT172,
219174_at	intraflagellar transport 74 homolog (Chlamydomonas)	9p21.2,	80173,		IFT74,
226098_at, 1558956_s_at	intraflagellar transport 80 homolog (Chlamydomonas)	3q26.1,	57560,		IFT80,	Asphyxiating thoracic dystrophy,Asphyxiating thoracic dystrophy 2,
229638_at	iroquois homeobox 3	16q12.2,	79191,		irx3,
214191_at	islet cell autoantigen 1, 69kDa	7p22,	3382,	hsa04940:Type I diabetes mellitus,	Ica1,
1555037_a_at, 242956_at, 201193_at, 242001_at	isocitrate dehydrogenase 1 (NADP+), soluble	2q33.3,	3417,	hsa00020:Citrate cycle (TCA cycle),hsa00480:Glutathione metabolism,	IDH1,
210046_s_at	isocitrate dehydrogenase 2 (NADP+), mitochondrial	15q26.1,	3418,	hsa00020:Citrate cycle (TCA cycle),hsa00480:Glutathione metabolism,	IDH2,
204615_x_at, 208881_x_at	isopentenyl-diphosphate delta isomerase 1	10p15.3,	3422,	hsa00900:Terpenoid backbone biosynthesis,	IDI1,
228793_at	jumonji domain containing 1C	10q21.2-q21.3,	221037,		JMJD1C,	Population-based genome-wide association studies reveal six loci influencing plasma levels of liver enzymes,
203751_x_at, 214326_x_at, 203752_s_at	jun D proto-oncogene	19p13.2,	3727,	hsa04010:MAPK signaling pathway,	JUND,
226352_at, 241985_at	junction mediating and regulatory protein, p53 cofactor	5q14.1,	133746,		JMY,
201015_s_at, 201650_at	junction plakoglobin	17q21,	3728,	hsa05200:Pathways in cancer,hsa05221:Acute myeloid leukemia,hsa05412:Arrhythmogenic right ventricular cardiomyopathy (ARVC),	JUP,	Arrhythmogenic right ventricular dysplasia, familial, 12,Naxos disease,
202057_at	karyopherin alpha 1 (importin alpha 5)	3q21,	3836,		KPNA1,
1552733_at	kelch domain containing 1	14q22.1,	122773,		Klhdc1,
217906_at	kelch domain containing 2	14q22.1,	23588,		Klhdc2,
228777_at	kelch repeat and BTB (POZ) domain containing 3	11q22.3,	143879,		KBTBD3,
229970_at, 223412_at	kelch repeat and BTB (POZ) domain containing 7	13q14.11,	84078,		KBTBD7,
228377_at	kelch-like 14 (Drosophila)	18q12.1,	57565,		KLHL14,
221838_at	kelch-like 22 (Drosophila)	22q11.21,	84861,		Klhl22,
221986_s_at, 242088_at, 243918_at, 206551_x_at, 226158_at, 221985_at	kelch-like 24 (Drosophila)	3q27.1,	54800,		KLHL24,
228328_at, 235727_at	kelch-like 28 (Drosophila)	14q21.3,	54813,		KLHL28,
221221_s_at	kelch-like 3 (Drosophila)	5q31,	26249,		KLHL3,
227565_at, 232297_at, 233866_at	kelch-like 5 (Drosophila)	4p14,	51088,		klhl5,
223250_at	kelch-like 7 (Drosophila)	7p15.3,	55975,		KLHL7,
204734_at	keratin 15	17q21.2,	3866,		Krt15,
209800_at	keratin 16; keratin type 16-like	17p11.2,17q12-q21,	3868,400578,		Krt16,KRT16P2,	Pachyonychia congenita, Jadassohn-Lewandowsky type,Palmoplantar keratoderma, nonepidermolytic,Palmoplantar verrucous nevus, unilateral,
205157_s_at, 212236_x_at	keratin 17; keratin 17 pseudogene 3	17q11.2,17q12-q21,	3872,729682,		KRT17,KRT17P3,	Pachyonychia congenita, Jackson-Lawler type,Steatocystoma multiplex,
228491_at	keratin 19	17q21.2,	3880,		KRT19,
242628_at	killer cell lectin-like receptor subfamily B, member 1	12p13,	3820,		KLRB1,
1557246_at	kinase D-interacting substrate, 220kDa	2p24,	57498,	hsa04722:Neurotrophin signaling pathway,	KIDINS220,
218755_at	kinesin family member 20A	5q31,	10112,		kif20a,
226791_at, 226792_s_at	kinesin family member C2	8q24.3,	90990,		KIFC2,
206822_s_at, 210306_at	l(3)mbt-like (Drosophila)	20q13.12,	26013,		L3MBTL,
1552486_s_at	lactamase, beta	15q22.1,	114294,		LACTB,
203726_s_at	laminin, alpha 3	18q11.2,	3909,	hsa04510:Focal adhesion,hsa04512:ECM-receptor interaction,hsa05200:Pathways in cancer,hsa05222:Small cell lung cancer,	LAMA3,	Epidermolysis bullosa, generalized atrophic benign,Epidermolysis bullosa, junctional, Herlitz type,Laryngoonychocutaneous syndrome,
210150_s_at	laminin, alpha 5	20q13.2-q13.3,	3911,	hsa04510:Focal adhesion,hsa04512:ECM-receptor interaction,hsa05200:Pathways in cancer,hsa05222:Small cell lung cancer,	LAMA5,
216264_s_at	laminin, beta 2 (laminin S)	3p21,	3913,	hsa04510:Focal adhesion,hsa04512:ECM-receptor interaction,hsa05200:Pathways in cancer,hsa05222:Small cell lung cancer,	lamb2,	Nephrosis, congenital, with or without ocular abnormalities,Pierson syndrome,
202245_at, 211019_s_at, 211018_at	lanosterol synthase (2,3-oxidosqualene-lanosterol cyclase)	21q22.3,	4047,	hsa00100:Steroid biosynthesis,	LSS,
218729_at	latexin	3q25.32,	56925,		LXN,
208949_s_at	lectin, galactoside-binding, soluble, 3	14q21-q22,	3958,		LGALS3,
200923_at	lectin, galactoside-binding, soluble, 3 binding protein	17q25,	3959,		LGALS3BP,
211356_x_at, 211354_s_at, 227095_at, 211355_x_at, 209894_at	leptin receptor	1p31,	3953,	hsa04060:Cytokine-cytokine receptor interaction,hsa04080:Neuroactive ligand-receptor interaction,hsa04630:Jak-STAT signaling pathway,hsa04920:Adipocytokine signaling pathway,	LEPR,	Genome-wide association analysis of metabolic traits in a birth cohort from a founder population,Loci Related to Metabolic-Syndrome Pathways Including LEPR, HNF1A, IL6R, and GCKR Associate with Plasma C-Reactive Protein: The Women's Genome Health Study,Obesity, morbid, with hypogonadism,
205381_at	leucine rich repeat containing 17	7q22.1,	10234,		LRRC17,
206076_at	leucine rich repeat containing 23	12p13,	10233,		lrrc23,
206088_at	leucine rich repeat containing 37, member A2	17q21.32,	474170,		LRRC37A2,
1559580_at	leucine rich repeat containing 39	1p21.2,	127495,		LRRC39,
229232_at	leucine rich repeat containing 57	15q15.1,	255252,		Lrrc57,
218437_s_at, 222632_s_at	leucine zipper transcription factor-like 1	3p21.3,	54585,		LZTFL1,
1564653_s_at	leucine, glutamate and lysine rich 1	3q25.31-q25.32,	389170,		LEKR1,	Genome-wide association analysis of susceptibility and clinical phenotype in multiple sclerosis,
229584_at	leucine-rich repeat kinase 2	12q12,	120892,	hsa05012:Parkinson's disease,	Lrrk2,	Genome-wide assocation defines more than 30 distinct susceptibility loci for Crohn's disease,Parkinson disease-8,
218326_s_at	leucine-rich repeat-containing G protein-coupled receptor 4	11p14-p13,	55366,		LGR4,
235498_at	leucine-rich repeats and IQ motif containing 3	1p31.1,	127255,		Lrriq3,
235347_at	leucine-rich repeats and calponin homology (CH) domain containing 3	3q29,	84859,		LRCH3,
211596_s_at	leucine-rich repeats and immunoglobulin-like domains 1	3p14,	26018,		lrig1,
238653_at	leucine-rich repeats and immunoglobulin-like domains 2	1p13.1,	9860,		LRIG2,
225575_at	leukemia inhibitory factor receptor alpha	5p13-p12,	3977,	hsa04060:Cytokine-cytokine receptor interaction,hsa04630:Jak-STAT signaling pathway,	Lifr,	Stuve-Wiedemann syndrome/Schwartz-Jampel type 2 syndrome,
208771_s_at	leukotriene A4 hydrolase	12q22,	4048,	hsa00590:Arachidonic acid metabolism,	LTA4H,
236172_at	leukotriene B4 receptor	14q11.2-q12,	1241,	hsa04080:Neuroactive ligand-receptor interaction,	LTB4R,
216250_s_at, 242778_at	leupaxin	11q12.1,	9404,		Lpxn,
218253_s_at	ligatin	1q31-q32,	1939,		LGTN,
212272_at, 212274_at, 212276_at	lipin 1	2p25.1,	23175,		lpin1,	Myoglobinuria, acute recurrent, autosomal recessive,
212531_at	lipocalin 2	9q34,	3934,		Lcn2,
214045_at	lipoic acid synthetase	4p14,	11019,	hsa00785:Lipoic acid metabolism,	LIAS,
200706_s_at, 200704_at, 1555454_at	lipopolysaccharide-induced TNF factor	16p13.13,	9516,		LITAF,	Charcot-Marie-Tooth disease, type 1C,
221833_at, 221834_at	lon peptidase 2, peroxisomal	16q12.1,	83752,		LONP2,
236311_at	loss of heterozygosity, 12, chromosomal region 2	12p13.2,	503693,		LOH12CR2,
227252_at	low density lipoprotein receptor-related protein 10	14q11.2,	26020,		LRP10,
241857_at	low density lipoprotein receptor-related protein 11	6q25.1,	84918,		Lrp11,
214110_s_at	lymphocyte-specific protein 1 pseudogene	1q21.1,2p11.1,	645166,654342,		LOC645166,LOC654342,
222585_x_at, 218303_x_at, 233329_s_at	lysine-rich coiled-coil 1	2p11.2,	51315,		KRCC1,
239516_at	lysophospholipase-like 1	1q41,	127018,		Lyplal1,
201552_at, 201551_s_at	lysosomal-associated membrane protein 1	13q34,	3916,	hsa04142:Lysosome,	lamp1,
226671_at, 203041_s_at, 203042_at, 200821_at	lysosomal-associated membrane protein 2	Xq24,	3920,	hsa04142:Lysosome,	lamp2,	Glycogen storage disease IIb,
205569_at	lysosomal-associated membrane protein 3	3q26.3-q27,	27074,	hsa04142:Lysosome,	LAMP3,
213975_s_at	lysozyme (renal amyloidosis)	12q15,	4069,		LYZ,	Amyloidosis, renal,Genomic association analysis suggests chromosome 12 locus influencing antihypertensive response to thiazide diuretic,Many sequence variants affecting diversity of adult human height,
215446_s_at	lysyl oxidase	5q23.2,	4015,		lox,	Cutis laxa, recessive, type I,
216320_x_at, 205614_x_at	macrophage stimulating 1 (hepatocyte growth factor-like)	3p21,	4485,		MST1,	Genome-wide assocation defines more than 30 distinct susceptibility loci for Crohn's disease,Genome-wide association study of 14,000 cases of seven common diseases and 3,000 shared controls,Sequence variants in the autophagy gene IRGM and multiple other replicating loci contribute to Crohn's disease susceptibility,
213380_x_at	macrophage stimulating, pseudogene 9	1p36.13,	11223,		MST1P9,
228764_s_at	magnesium-dependent phosphatase 1	14q12,	145553,		MDP1,
210224_at	major histocompatibility complex, class I-related	1q25.3,	3140,		MR1,
217478_s_at	major histocompatibility complex, class II, DM alpha	6p21.3,	3108,	hsa04514:Cell adhesion molecules (CAMs),hsa04612:Antigen processing and presentation,hsa04672:Intestinal immune network for IgA production,hsa04940:Type I diabetes mellitus,hsa05310:Asthma,hsa05320:Autoimmune thyroid disease,hsa05322:Systemic lupus erythematosus,hsa05330:Allograft rejection,hsa05332:Graft-versus-host disease,hsa05416:Viral myocarditis,	HLA-DMA,
202180_s_at	major vault protein	16p13.1-p11.2,	9961,		MVP,
209845_at, 201285_at	makorin ring finger protein pseudogene 6; makorin ring finger protein 1	12q21.32,7q34,	23608,400058,		MKRN1,MKRN9P,
235374_at	malate dehydrogenase 1, NAD (soluble)	2p13.3,	4190,	hsa00020:Citrate cycle (TCA cycle),hsa00620:Pyruvate metabolism,hsa00630:Glyoxylate and dicarboxylate metabolism,	Mdh1,
1558077_s_at, 238721_at	malate dehydrogenase 1B, NAD (soluble)	2q33.3,	130752,		Mdh1b,
244450_at	male germ cell-associated kinase	6p24,	4117,		mak,
208116_s_at, 221760_at	mannosidase, alpha, class 1A, member 1	6q22,	4121,	hsa00510:N-Glycan biosynthesis,	MAN1A1,
214703_s_at	mannosidase, alpha, class 2B, member 2	4p16.1,	23324,	hsa00511:Other glycan degradation,	MAN2B2,
203778_at	mannosidase, beta A, lysosomal	4q22-q25,	4126,	hsa00511:Other glycan degradation,hsa04142:Lysosome,	MANBA,	Mannosidosis, beta,
241336_at	mannosyl (alpha-1,3-)-glycoprotein beta-1,4-N-acetylglucosaminyltransferase, isozyme A	2q12,	11320,	hsa00510:N-Glycan biosynthesis,	MGAT4A,
220711_at	mastermind-like 1 (Drosophila)	5q35,	9794,	hsa04330:Notch signaling pathway,	MAML1,
235457_at	mastermind-like 2 (Drosophila)	11q21,	84441,	hsa04330:Notch signaling pathway,	MAML2,	Mucoepidermoid salivary gland carcinoma,
242794_at	mastermind-like 3 (Drosophila)	4q28,	55534,	hsa04330:Notch signaling pathway,	MAML3,
202350_s_at	matrilin 2	8q22,	4147,		Matn2,
202291_s_at	matrix Gla protein	12p13.1-p12.3,	4256,		MGP,	Keutel syndrome,Natural teeth remaining intact,
204259_at	matrix metallopeptidase 7 (matrilysin, uterine)	11q21-q22,	4316,	hsa04310:Wnt signaling pathway,	mmp7,
243552_at, 226797_at	mbt domain containing 1	17q21.33,	54799,		mbtd1,
223946_at	mediator complex subunit 23	6q22.33-q24.1,	9439,		MED23,
1553993_s_at	mediator complex subunit 25	19q13.3,	81857,		MED25,
207078_at	mediator complex subunit 6	14q24.2,	10001,		MED6,
223700_at	meiotic nuclear divisions 1 homolog (S. cerevisiae)	4q31.3,	84057,		MND1,
208682_s_at, 213627_at	melanoma antigen family D, 2	Xp11.2,	10916,		MAGED2,
218211_s_at	melanophilin	2q37.3,	79083,		Mlph,	Griscelli syndrome, type 3,
209737_at	membrane associated guanylate kinase, WW and PDZ domain containing 2	7q21,	9863,	hsa04530:Tight junction,	MAGI2,
226770_at	membrane associated guanylate kinase, WW and PDZ domain containing 3	1p12-p11.2,	260425,	hsa04530:Tight junction,	MAGI3,
227379_at	membrane bound O-acyltransferase domain containing 1	6p22.3,	154141,		MBOAT1,
203434_s_at, 203435_s_at	membrane metallo-endopeptidase	3q25.1-q25.2,	4311,	hsa04614:Renin-angiotensin system,hsa04640:Hematopoietic cell lineage,hsa05010:Alzheimer's disease,	MME,	Membranous glomerulonephritis, antenatal,Neutral endopeptidase deficiency,
202974_at	membrane protein, palmitoylated 1, 55kDa	Xq28,	4354,		MPP1,
238778_at	membrane protein, palmitoylated 7 (MAGUK p55 subfamily member 7)	10p11.23,	143098,		MPP7,
215512_at	membrane-associated ring finger (C3HC4) 6	5p15.2,	10299,		MARCH6,
221824_s_at	membrane-associated ring finger (C3HC4) 8	10q11.21,	220972,		MARCH8,
205330_at	meningioma (disrupted in balanced translocation) 1	22q11,22q11|22q12.1,	4330,		mn1,	Meningioma,
235868_at, 200898_s_at, 223494_at, 200899_s_at, 214972_at	meningioma expressed antigen 5 (hyaluronidase)	10q24.1-q24.3,	10724,		mgea5,
230298_at	metallo-beta-lactamase domain containing 2	5q14.3,	153364,		MBLAC2,
213924_at, 214071_at	metallophosphoesterase 1	18p11.21,	65258,		MPPE1,
215692_s_at	metallophosphoesterase domain containing 2	11p13,	744,		MPPED2,
217165_x_at	metallothionein 1F	16q13,	4494,		MT1F,	Many sequence variants affecting diversity of adult human height,
204326_x_at, 208581_x_at	metallothionein 1X	16q13,	4501,		MT1X,
212185_x_at	metallothionein 2A	16q13,	4502,		MT2A,
219786_at	metallothionein-like 5, testis-specific (tesmin)	11q13.2-q13.3,	9633,		Mtl5,
226852_at	metastasis associated 1 family, member 3	2p21,	57504,		MTA3,
224559_at, 223578_x_at, 224568_x_at, 227510_x_at, 231735_s_at	metastasis associated lung adenocarcinoma transcript 1 (non-protein coding)	11q13.1,	378938,		MALAT1,
203037_s_at	metastasis suppressor 1	8p22,	9788,		mtss1,
218773_s_at	methionine sulfoxide reductase B2	10p12,	22921,		msrB2,
202616_s_at	methyl CpG binding protein 2 (Rett syndrome)	Xq28,	4204,		mecp2,	Angelman syndrome,Autism, susceptibility to, X-linked-3,Encephalopathy, neonatal severe,Lubs X-linked mental retardation syndrome,Mental retardation, X-linked, Lubs type,Mental retardation, X-linked, syndromic 13,PPM-X syndrome,Rett syndrome,Rett syndrome, preserved speech variant,
227839_at	methyl-CpG binding domain protein 5	2q23.1,	55777,		MBD5,	Mental retardation, autosomal dominant 1,
226076_s_at, 227833_s_at	methyl-CpG binding domain protein 6		114785,		MBD6,
218440_at	methylcrotonoyl-Coenzyme A carboxylase 1 (alpha)	3q27,	56922,	hsa00280:Valine, leucine and isoleucine degradation,	MCCC1,	3-Methylcrotonyl-CoA carboxylase 1 deficiency,
242750_at	methylmalonic aciduria (cobalamin deficiency) cblA type	4q31.22,	166785,		MMAA,	Methylmalonic aciduria, vitamin B12-responsive,
225826_at	methylmalonic aciduria (cobalamin deficiency) cblB type	12q24,	326625,	hsa00860:Porphyrin and chlorophyll metabolism,	MMAB,	Common variants at 30 loci contribute to polygenic dyslipidemia,Methylmalonic aciduria, vitamin B12-responsive, due to defect in synthesis of adenosylcobalamin, cblB complementation type,Newly identified loci that influence lipid concentrations and risk of coronary artery disease,
226238_at	methylmalonyl CoA epimerase	2p13.3,	84693,	hsa00280:Valine, leucine and isoleucine degradation,hsa00640:Propanoate metabolism,	MCEE,	Methylmalonyl-CoA epimerase deficiency,
202959_at	methylmalonyl Coenzyme A mutase	6p12.3,	4594,	hsa00280:Valine, leucine and isoleucine degradation,hsa00640:Propanoate metabolism,	MUT,	Methylmalonic aciduria, muttype,
242247_at	methyltransferase 5 domain containing 1	11p14.1,	196074,		METT5D1,
226634_at	methyltransferase like 10	10q26.13,	399818,		Mettl10,
211424_x_at, 209703_x_at, 207761_s_at	methyltransferase like 7A	12q13.13,	25840,		mettl7a,
239130_at	microRNA 101-1	1p31.3,	406893,		MIR101-1,
207430_s_at, 210297_s_at	microseminoprotein, beta-	10q11.2,	4477,		msmB,	Multiple loci identified in a genome-wide association study of prostate cancer,Multiple newly identified loci associated with prostate cancer susceptibility,Prostate cancer, hereditary, 13,
201403_s_at	microsomal glutathione S-transferase 3	1q23,	4259,	hsa00480:Glutathione metabolism,hsa00980:Metabolism of xenobiotics by cytochrome P450,hsa00982:Drug metabolism,	Mgst3,
224378_x_at, 227219_x_at	microtubule-associated protein 1 light chain 3 alpha	20cen-q13,	84557,		map1lc3a,
239845_at	microtubule-associated protein 1 light chain 3 beta	16q24.2,	81631,		MAP1LC3B,
225540_at	microtubule-associated protein 2	2q34-q35,	4133,		map2,
213489_at, 202501_at	microtubule-associated protein, RP/EB family, member 2	18q12.1,	10982,		MAPRE2,
210694_s_at, 242671_at, 203636_at, 203637_s_at	midline 1 (Opitz/BBB syndrome)	Xp22,	4281,	hsa04120:Ubiquitin mediated proteolysis,	MID1,	New sequence variants associated with bone mineral density,Opitz G syndrome, type I,
241541_at, 226644_at	mindbomb homolog 2 (Drosophila)	1p36.33,	142678,		mib2,
203801_at	mitochondrial ribosomal protein S14	1q23-q25,	63931,		mRpS14,
223356_s_at	mitochondrial translational initiation factor 3	13q12.2,	219402,		mtif3,
212096_s_at	mitochondrial tumor suppressor 1	8p22,	57509,		MTUS1,
213178_s_at	mitogen-activated protein kinase 8 interacting protein 3	16p13.3,	23162,	hsa04010:MAPK signaling pathway,	MAPK8IP3,
216765_at, 211370_s_at, 235601_at	mitogen-activated protein kinase kinase 5	15q23,	5607,	hsa04010:MAPK signaling pathway,hsa04540:Gap junction,hsa04722:Neurotrophin signaling pathway,	Map2k5,	Genome-wide association study of restless legs syndrome identifies common variants in three genomic regions,
225927_at	mitogen-activated protein kinase kinase kinase 1	5q11.2,	4214,	hsa04010:MAPK signaling pathway,hsa04120:Ubiquitin mediated proteolysis,hsa04622:RIG-I-like receptor signaling pathway,hsa04722:Neurotrophin signaling pathway,hsa04912:GnRH signaling pathway,	MAP3K1,	Genome-wide association study identifies novel breast cancer susceptibility loci,
205447_s_at	mitogen-activated protein kinase kinase kinase 12	12q13,	7786,	hsa04010:MAPK signaling pathway,	MAP3K12,
226441_at	mitogen-activated protein kinase kinase kinase 2	2q14.3,	10746,	hsa04010:MAPK signaling pathway,hsa04540:Gap junction,hsa04912:GnRH signaling pathway,	MAP3K2,
205027_s_at, 235421_at	mitogen-activated protein kinase kinase kinase 8	10p11.23,	1326,	hsa04010:MAPK signaling pathway,hsa04620:Toll-like receptor signaling pathway,hsa04660:T cell receptor signaling pathway,	MAP3K8,	Lung cancer, somatic,
239468_at	mohawk homeobox	10p12.1,	283078,		MKX,
212741_at	monoamine oxidase A	Xp11.3,	4128,	hsa00260:Glycine, serine and threonine metabolism,hsa00330:Arginine and proline metabolism,hsa00340:Histidine metabolism,hsa00350:Tyrosine metabolism,hsa00360:Phenylalanine metabolism,hsa00380:Tryptophan metabolism,hsa00982:Drug metabolism,	MAOA,	antisocial behavior,Brunner syndrome,
1554474_a_at, 209708_at	monooxygenase, DBH-like 1	6q23.1-q23.3,	26002,		MOXD1,
207847_s_at, 213693_s_at, 211695_x_at	mucin 1, cell surface associated	1q21,	4582,		MUC1,
227241_at, 227238_at	mucin 15, cell surface associated	11p14.3,	143662,		MUC15,
220196_at	mucin 16, cell surface associated	19p13.2,	94025,		MUC16,
231941_s_at, 243774_at, 226622_at, 230043_at, 1558220_at	mucin 20, cell surface associated	3q29,	200958,		MUC20,
227327_at, 214778_at	multiple EGF-like-domains 8	19q12,	1954,		Megf8,
212830_at	multiple EGF-like-domains 9	9q32-q33.3,	1955,		MEGF9,
225240_s_at, 225237_s_at	musashi homolog 2 (Drosophila)	17q22,	124540,		MSI2,
225185_at	muscle RAS oncogene homolog	3q22.3,	22808,	hsa04010:MAPK signaling pathway,hsa04530:Tight junction,hsa04810:Regulation of actin cytoskeleton,	mras,
205017_s_at, 232369_at, 232138_at, 203640_at, 236699_at, 205018_s_at	muscleblind-like 2 (Drosophila)	13q32.1,	10150,		mbnl2,
235067_at	muskelin 1, intracellular mediator containing kelch motifs	7q32,	4289,		MKLN1,
226225_at	mutated in colorectal cancers	5q21,	4163,		MCC,	Colorectal cancer,
205408_at, 243003_at	myeloid/lymphoid or mixed-lineage leukemia (trithorax homolog, Drosophila); translocated to, 10	10p12,	8028,		mllt10,	Leukemia, acute myeloid,Leukemia, acute T-cell lymphoblastic,
1569652_at	myeloid/lymphoid or mixed-lineage leukemia (trithorax homolog, Drosophila); translocated to, 3	9p22,	4300,		MLLT3,
226100_at	myeloid/lymphoid or mixed-lineage leukemia 5 (trithorax homolog, Drosophila)	7q22.1,	55904,		MLL5,
209199_s_at, 209200_at	myocyte enhancer factor 2C	5q14,	4208,	hsa04010:MAPK signaling pathway,	MEF2C,	Framingham Heart Study 100K Project: genome-wide associations for blood pressure and arterial stiffness,
225641_at	myocyte enhancer factor 2D	1q12-q23,	4209,		MEF2D,
217518_at	myoferlin	10q24,	26509,		Myof,
204179_at	myoglobin	22q13.1,	4151,		MB,
218966_at	myosin VC	15q21,	55930,		MYO5C,
203215_s_at	myosin VI	6q13,	4646,		myo6,	Deafness, autosomal dominant 22,Deafness, autosomal recessive 37,Deafness, sensorineural, with hypertrophic cardiomyopathy,
224823_at	myosin light chain kinase	3q21,	4638,	hsa04020:Calcium signaling pathway,hsa04270:Vascular smooth muscle contraction,hsa04510:Focal adhesion,hsa04810:Regulation of actin cytoskeleton,	MYLK,
223129_x_at, 220319_s_at, 228098_s_at, 227707_at, 228097_at, 223130_s_at	myosin regulatory light chain interacting protein	6p23-p22.3,	29116,		MYLIP,
213067_at	myosin, heavy chain 10, non-muscle	17p13,	4628,	hsa04530:Tight junction,hsa04810:Regulation of actin cytoskeleton,hsa05416:Viral myocarditis,	myh10,
1557744_at	myosin, heavy chain 7B, cardiac muscle, beta	20q11.22,	57644,	hsa04530:Tight junction,hsa05416:Viral myocarditis,	Myh7b,
214002_at	myosin, light chain 6, alkali, smooth muscle and non-muscle	12q13.2,	4637,	hsa04270:Vascular smooth muscle contraction,	myl6,
36920_at	myotubularin 1	Xq28,	4534,		Mtm1,	Myotubular myopathy, X-linked,
205076_s_at	myotubularin related protein 11	1q12-q21,	10903,		MTMR11,	Many sequence variants affecting diversity of adult human height,
226956_at	myotubularin related protein 3	22q12.2,	8897,		mtmr3,
228582_x_at	myozenin 2	4q26-q27,	51778,		myoz2,
213002_at, 225897_at, 201670_s_at, 201668_x_at	myristoylated alanine-rich protein kinase C substrate	6q22.2,	4082,	hsa04666:Fc gamma R-mediated phagocytosis,	MARCKS,
228523_at	nanos homolog 1 (Drosophila)	10q26.11,	340719,		NANOS1,
229422_at	nardilysin (N-arginine dibasic convertase)	1p32.2-p32.1,	4898,		NRD1,
222018_at	nascent polypeptide-associated complex alpha subunit 2	17q23.2,	342538,		NACA2,	Many sequence variants affecting diversity of adult human height,
203961_at, 241782_at, 203962_s_at	nebulette	10p12,	10529,		Nebl,
1557071_s_at	negative regulator of ubiquitin-like proteins 1	7q36,	51667,		Nub1,
1568857_a_at	neighbor of BRCA1 gene 1	17q21.31,	4077,		NBR1,
225911_at	nephronectin	4q24,	255743,		NPNT,
235410_at	nephronophthisis 3 (adolescent); acyl-Coenzyme A dehydrogenase family, member 11	3q22.1,	27031,84129,		ACAD11,NPHP3,	Nephronophthisis, adolescent,Renal-hepatic-pancreatic dysplasia with Dandy-Walker cyst,
223315_at	netrin 4	12q22,12q22|12q22-q23,	59277,	hsa04360:Axon guidance,	NTN4,
226974_at, 212448_at	neural precursor cell expressed, developmentally down-regulated 4-like	18q21,	23327,	hsa04120:Ubiquitin mediated proteolysis,hsa04144:Endocytosis,hsa04960:Aldosterone-regulated sodium reabsorption,	Nedd4l,
225355_at	neuralized homolog 1B (Drosophila)	5q35.1,	54492,		NEURL1B,
230283_at	neuralized homolog 2 (Drosophila)	20q13.12,	140825,		NEURL2,
218625_at	neuritin 1	6p25.1,	51299,		NRN1,
205794_s_at	neuro-oncological ventral antigen 1	14q,	4857,		NOVA1,
230712_at, 212854_x_at	neuroblastoma breakpoint family, member 15; neuroblastoma breakpoint family, member 14; neuroblastoma breakpoint family, member 9; neuroblastoma breakpoint family, member 11; neuroblastoma breakpoint family, member 11-like; neuroblastoma breakpoint family, member 10; neuroblastoma breakpoint family, member 12; neuroblastoma breakpoint family, member 20; neuroblastoma breakpoint family, member 1; …	1p36.13,1q12-q21.2,1q21.1,1q21.2,	100132406,149013,200030,25832,284565,400818,440670,440675,55672,728841,728912,		AE01,KIAA1245,LOC200030,NBPF1,NBPF10,NBPF11,NBPF12,NBPF14,NBPF15,NBPF8,NBPF9,
201830_s_at	neuroepithelial cell transforming 1	10p15,	10276,		NET1,
206023_at	neuromedin U	4q12,	10874,		Nmu,
224772_at	neuron navigator 1	1q32.3,	89796,		NAV1,
218330_s_at	neuron navigator 2	11p15.1,	89797,		NAV2,
214184_at	neuropeptide FF-amide peptide precursor	12q13.13,	8620,		npff,
205440_s_at	neuropeptide Y receptor Y1	4q31.3-q32,	4886,	hsa04080:Neuroactive ligand-receptor interaction,	Npy1r,
227566_at	neurotrimin	11q25,	50863,		Ntm,
205220_at	niacin receptor 2; niacin receptor 1	12q24.31,	338442,8843,		GPR109A,GPR109B,
208759_at	nicastrin	1q22-q23,	23385,	hsa04330:Notch signaling pathway,hsa05010:Alzheimer's disease,	NCSTN,
223442_at	nicolin 1	3p21.31,	84276,		Nicn1,
228090_at	nicotinamide nucleotide adenylyltransferase 3	3q23,	349565,	hsa00760:Nicotinate and nicotinamide metabolism,	NMNAT3,
207705_s_at	ninein-like	20p11.22-p11.1,	22981,		NINL,
203045_at	ninjurin 1	9q22,	4814,		Ninj1,
235506_at	nitric oxide synthase trafficker	2q24.3,	115677,		NOSTRIN,
228506_at	non-SMC element 4 homolog A (S. cerevisiae)	10q26.13,	54780,		NSMCE4A,
228291_s_at, 219961_s_at	non-protein coding RNA 153	20pter-q11.23,	55857,		PLK1S1,
242557_at, 215985_at	non-protein coding RNA 171; HLA complex P5 pseudogene 10	6p21.3,6p21.33,	352990,80862,		HCP5P10,NCRNA00171,
237591_at	non-protein coding RNA 173	12q24.22,	400077,
228993_s_at, 213224_s_at, 232910_at	non-protein coding RNA 81	10q25.2,	92482,		NCRNA00081,
227062_at, 224565_at, 234989_at, 224566_at, 214657_s_at, 225239_at	non-protein coding RNA 84	11q13.1,	283131,		Neat1,
222027_at	nuclear casein kinase and cyclin-dependent kinase substrate 1	1q32.1,	64710,		Nucks1,
200758_s_at, 200759_x_at, 214179_s_at	nuclear factor (erythroid-derived 2)-like 1	17q21.3,	4779,		NFE2L1,
230291_s_at, 213029_at, 230791_at, 213032_at	nuclear factor I/B	9p24.1,	4781,		NFIB,
227400_at	nuclear factor I/X (CCAAT-binding transcription factor)	19p13.3,	4784,		nfix,
208003_s_at	nuclear factor of activated T-cells 5, tonicity-responsive	16q22.1,	10725,	hsa04310:Wnt signaling pathway,hsa04360:Axon guidance,hsa04370:VEGF signaling pathway,hsa04650:Natural killer cell mediated cytotoxicity,hsa04660:T cell receptor signaling pathway,hsa04662:B cell receptor signaling pathway,	NFAT5,
211105_s_at	nuclear factor of activated T-cells, cytoplasmic, calcineurin-dependent 1	18q23,	4772,	hsa04310:Wnt signaling pathway,hsa04360:Axon guidance,hsa04370:VEGF signaling pathway,hsa04650:Natural killer cell mediated cytotoxicity,hsa04660:T cell receptor signaling pathway,hsa04662:B cell receptor signaling pathway,	nfatc1,
201502_s_at	nuclear factor of kappa light polypeptide gene enhancer in B-cells inhibitor, alpha	14q13,	4792,	hsa04062:Chemokine signaling pathway,hsa04210:Apoptosis,hsa04620:Toll-like receptor signaling pathway,hsa04621:NOD-like receptor signaling pathway,hsa04622:RIG-I-like receptor signaling pathway,hsa04623:Cytosolic DNA-sensing pathway,hsa04660:T cell receptor signaling pathway,hsa04662:B cell receptor signaling pathway,hsa04722:Neurotrophin signaling pathway,hsa04920:Adipocytokine signaling pathway…	NFKBIA,	Ectodermal dysplasia, anhidrotic, with T-cell immunodeficiency,
223217_s_at	nuclear factor of kappa light polypeptide gene enhancer in B-cells inhibitor, zeta	3p12-q12,	64332,		NFKBIZ,
214250_at, 200747_s_at	nuclear mitotic apparatus protein 1	11q13,	4926,		NUMA1,	Leukemia, acute promyelocytic, NUMA/RARA type,
209230_s_at	nuclear protein, transcriptional regulator, 1	16p11.2,	26471,		nupr1,
225949_at	nuclear receptor binding protein 2	8q24.3,	340371,		NRBP2,
209106_at	nuclear receptor coactivator 1	2p23,	8648,		NCOA1,
205731_s_at, 212867_at, 215605_at, 205732_s_at	nuclear receptor coactivator 2	8q13.3,	10499,		Ncoa2,
210774_s_at	nuclear receptor coactivator 4	10q11.2,	8031,	hsa05200:Pathways in cancer,hsa05216:Thyroid cancer,	NCOA4,	Thyroid carcinoma, papillary,
225768_at, 209750_at	nuclear receptor subfamily 1, group D, member 2	3p24.2,	9975,		NR1D2,
203920_at	nuclear receptor subfamily 1, group H, member 3	11p11.2,	10062,	hsa03320:PPAR signaling pathway,	NR1H3,	Genome-wide association analysis of metabolic traits in a birth cohort from a founder population,
209505_at	nuclear receptor subfamily 2, group F, member 1	5q14,	7025,		NR2F1,
232431_at, 216321_s_at	nuclear receptor subfamily 3, group C, member 1 (glucocorticoid receptor)	5q31.3,	2908,	hsa04080:Neuroactive ligand-receptor interaction,	NR3C1,	Cortisol resistance,
205259_at	nuclear receptor subfamily 3, group C, member 2	4q31.1,	4306,	hsa04960:Aldosterone-regulated sodium reabsorption,	NR3C2,	Hypertension, early-onset, autosomal dominant, with exacerbation in pregnancy,Pseudohypoaldosteronism type I, autosomal dominant,
235739_at, 216248_s_at, 204621_s_at, 204622_x_at	nuclear receptor subfamily 4, group A, member 2	2q22-q23,	4929,		NR4A2,	Parkinson disease,
232478_at	nuclear receptor subfamily 6, group A, member 1	9q33-q34.1,	2649,		Nr6a1,
200649_at, 200646_s_at	nucleobindin 1	19q13.2-q13.4,	4924,		NUCB1,
203675_at, 229838_at	nucleobindin 2	11p15.1-p14,	4925,		nucb2,
219978_s_at	nucleolar and spindle associated protein 1	15q15.1,	51203,		NUSAP1,
219368_at	nucleosome assembly protein 1-like 2	Xq13,	4674,		NAP1L2,
220176_at	nucleotide binding protein-like	14q12,	80224,		NUBPL,	Genome-wide association analysis of susceptibility and clinical phenotype in multiple sclerosis,Whole genome association study identifies polymorphisms associated with QT prolongation during iloperidone treatment of schizophrenia,
223535_at	nudix (nucleoside diphosphate linked moiety X)-type motif 12	5q21.2,	83594,	hsa00760:Nicotinate and nicotinamide metabolism,	NUDT12,
214136_at	nudix (nucleoside diphosphate linked moiety X)-type motif 13	10q22.1,	25961,		Nudt13,
230329_s_at, 220183_s_at	nudix (nucleoside diphosphate linked moiety X)-type motif 6	4q26,	11162,		Nudt6,
228855_at	nudix (nucleoside diphosphate linked moiety X)-type motif 7	16q23.1,	283927,		NUDT7,
236930_at	numb homolog (Drosophila)	14q24.3,	8650,	hsa04330:Notch signaling pathway,	numb,	Genome-wide association study for subclinical atherosclerosis in major arterial territories in the NHLBI's Framingham Heart Study,
212776_s_at, 212775_at	obscurin-like 1	2q35,	23363,		Obsl1,
205441_at	occludin/ELL domain containing 1	19p13.11,	79629,		OCEL1,
213568_at	odd-skipped related 2 (Drosophila)	8q22.2,	116039,		OSR2,
213075_at	olfactomedin-like 2A	9q33.3,	169611,		OLFML2A,
240824_at	oligonucleotide/oligosaccharide-binding fold containing 1	10q24.33,	79991,		OBFC1,	Genome-wide association of echocardiographic dimensions, brachial artery endothelial function and treadmill exercise responses in the Framingham Heart Study,
206323_x_at	oligophrenin 1	Xq12,	4983,		OPHN1,	Mental retardation, X-linked, with cerebellar hypoplasia and distinctive facial appearance,
226810_at	opioid growth factor receptor-like 1	6q13,	79627,		OGFRL1,
202073_at, 202074_s_at	optineurin	10p13,	10133,		OPTN,	Glaucoma 1, open angle, E,Glaucoma, normal tension, susceptibility to,
205432_at	oviductal glycoprotein 1, 120kDa	1p13,	5016,		Ovgp1,
206048_at	ovo-like 2 (Drosophila)	20pter-q11.23,	58495,		OVOL2,
223879_s_at, 218197_s_at, 222553_x_at	oxidation resistance 1	8q23,	55074,		oxr1,
1563051_at	oxysterol binding protein	11q12-q13,	5007,		OSBP,
208158_s_at, 209485_s_at	oxysterol binding protein-like 1A	18q11.1,	114876,		OSBPL1A,	A Genome-Wide Association Study Identifies Protein Quantitative Trait Loci (pQTLs),
227946_at	oxysterol binding protein-like 7	17q21,	114881,		OSBPL7,
236472_at, 218047_at	oxysterol binding protein-like 9	1p32.3,	114883,		OSBPL9,
205646_s_at, 235795_at	paired box 6	11p13,	5080,	hsa04950:Maturity onset diabetes of the young,	Pax6,	Aniridia,Aniridia, type II,Cataract with late-onset corneal dystrophy,Cataract, congenital, with late-onset corneal dystrophy,Coloboma of optic nerve,Coloboma, ocular,Ectopia pupillae,Eye anomalies, multiplex,Foveal hyperplasia,Foveal hypoplasia, isolated,Gillespie syndrome,Keratitis,Morning glory disc anomaly,Optic nerve hypoplasia,Optic nerve hypoplasia/aplasia,Peters anomaly,
225321_s_at, 220954_s_at	paired immunoglobin-like type 2 receptor beta	7q22.1,	29990,		PILRB,
222826_at	pallidin homolog (mouse)	15q21.1,	26258,		PLDN,
209826_at	palmitoyl-protein thioesterase 2	6p21.3,	9374,	hsa00062:Fatty acid elongation in mitochondria,hsa04142:Lysosome,	Ppt2,
226649_at	pantothenate kinase 1	10q23.31,	53354,	hsa00770:Pantothenate and CoA biosynthesis,	PANK1,	Genome-wide association analysis of metabolic traits in a birth cohort from a founder population,
226435_at	papilin, proteoglycan-like sulfated glycoprotein	14q24.2,	89932,		Papln,
235165_at	par-6 partitioning defective 6 homolog beta (C. elegans)	20q13.13,	84612,	hsa04144:Endocytosis,hsa04530:Tight junction,	Pard6b,
212705_x_at	patatin-like phospholipase domain containing 2	11p15.5,	57104,		PNPLA2,	Neutral lipid storage disease with myopathy,
233030_at	patatin-like phospholipase domain containing 3	22q13.31,	80339,	hsa00350:Tyrosine metabolism,hsa00360:Phenylalanine metabolism,hsa00561:Glycerolipid metabolism,hsa00564:Glycerophospholipid metabolism,hsa00903:Limonene and pinene degradation,	pnpla3,	Population-based genome-wide association studies reveal six loci influencing plasma levels of liver enzymes,
209739_s_at	patatin-like phospholipase domain containing 4	Xp22.3,	8228,	hsa00830:Retinol metabolism,	PNPLA4,
228383_at	patatin-like phospholipase domain containing 7	9q34.3,	375775,		PNPLA7,
209815_at	patched homolog 1 (Drosophila)	9q22.3,	5727,	hsa04340:Hedgehog signaling pathway,hsa05200:Pathways in cancer,hsa05217:Basal cell carcinoma,	ptch1,	Basal cell carcinoma, somatic,Basal cell nevus syndrome,Genome-wide association analysis identifies 20 loci that influence adult height,Holoprosencephaly-7,Medulloblastoma, somatic,
229202_at	pecanex-like 2 (Drosophila)	1q42.2,	80003,		PCNXL2,
218319_at, 232304_at	pellino homolog 1 (Drosophila)	2p13.3,	57162,		PELI1,
219132_at	pellino homolog 2 (Drosophila)	14q21,	57161,		PELI2,
219658_at	pentatricopeptide repeat domain 2	5q13.2,	79810,		PTCD2,
244534_at	peptidase (mitochondrial processing) beta	7q22.1,	9512,		PMPCB,
229947_at	peptidase inhibitor 15	8q21.11,	51050,		pi15,	A Genome-Wide Association Study Identifies Protein Quantitative Trait Loci (pQTLs),
202336_s_at	peptidylglycine alpha-amidating monooxygenase	5q14-q21,	5066,		pam,
228469_at	peptidylprolyl isomerase D	4q31.3,	5481,	hsa04020:Calcium signaling pathway,hsa05012:Parkinson's disease,hsa05016:Huntington's disease,	ppiD,
228905_at	pericentriolar material 1	8p22-p21.3,	5108,		pcm1,	Thyroid carcinoma, papillary,
203407_at	periplakin	16p13.3,	5493,		ppl,
204873_at, 215023_s_at	peroxisomal biogenesis factor 1	7q21.2,	5189,		pex1,	Adrenoleukodystrophy, neonatal,Many sequence variants affecting diversity of adult human height,Refsum disease, infantile,Zellweger syndrome-1,
205160_at	peroxisomal biogenesis factor 11 alpha	15q26.1,	8800,		PEX11A,
202658_at	peroxisomal biogenesis factor 11 beta	1q21.1,	8799,		PEX11B,
204545_at	peroxisomal biogenesis factor 6	6p21.1,	5190,		PEX6,	Peroxisomal biogenesis disorder, complementation group 4,Peroxisomal biogenesis disorder, complementation group 6,
219428_s_at, 224210_s_at, 238746_at	peroxisomal membrane protein 4, 24kDa	20q11.22,	11264,		PXMP4,
223437_at	peroxisome proliferator-activated receptor alpha	22q12-q13.1,22q12-q13.1|22q13.31,	5465,	hsa03320:PPAR signaling pathway,hsa04920:Adipocytokine signaling pathway,	PPARA,	Hyperapobetalipoproteinemia, susceptibility to,
219543_at	phenazine biosynthesis-like protein domain containing	10pter-q25.3,	64081,		PBLD,
204285_s_at, 204286_s_at	phorbol-12-myristate-13-acetate-induced protein 1	18q21.32,	5366,	hsa04115:p53 signaling pathway,	PMAIP1,
233314_at, 211711_s_at, 233254_x_at	phosphatase and tensin homolog; phosphatase and tensin homolog pseudogene 1	10q23.3,9p21,	11191,5728,	hsa00562:Inositol phosphate metabolism,hsa04070:Phosphatidylinositol signaling system,hsa04115:p53 signaling pathway,hsa04510:Focal adhesion,hsa04530:Tight junction,hsa05200:Pathways in cancer,hsa05213:Endometrial cancer,hsa05214:Glioma,hsa05215:Prostate cancer,hsa05218:Melanoma,hsa05222:Small cell lung cancer,	pten,PTENP1,	Bannayan-Riley-Ruvalcaba syndrome,chromosome 10q23 deletion syndrome,Cowden disease,Endometrial carcinoma,Juvenile polyposis syndrome, infantile form,Lhermitte-Duclos syndrome,Macrocephaly/autism syndrome,Meningioma,Oligodendroglioma,Prostate cancer,Proteus syndrome,Thyroid carcinoma, follicular,VATER association with hydrocephalus,
212230_at, 212226_s_at, 209355_s_at	phosphatidic acid phosphatase type 2B	1pter-p22.1,	8613,	hsa00561:Glycerolipid metabolism,hsa00564:Glycerophospholipid metabolism,hsa00565:Ether lipid metabolism,hsa00600:Sphingolipid metabolism,hsa04666:Fc gamma R-mediated phagocytosis,	Ppap2b,
205353_s_at	phosphatidylethanolamine binding protein 1	12q24.23,9q34.1,	5037,		PEBP1,
1559479_at	phosphatidylinositol 4-kinase type 2 beta	4p15.2,	55300,		Pi4k2b,
235532_at	phosphatidylinositol glycan anchor biosynthesis, class M	1q23.2,	93183,	hsa00563:Glycosylphosphatidylinositol(GPI)-anchor biosynthesis,	PIGM,	Glycosylphosphatidylinositol deficiency,
51146_at, 219238_at	phosphatidylinositol glycan anchor biosynthesis, class V	1p36.11,	55650,	hsa00563:Glycosylphosphatidylinositol(GPI)-anchor biosynthesis,	PIGV,
220041_at	phosphatidylinositol glycan anchor biosynthesis, class Z	3q29,	80235,	hsa00563:Glycosylphosphatidylinositol(GPI)-anchor biosynthesis,	PIGZ,
239808_at	phosphatidylinositol transfer protein, cytoplasmic 1	17q24.2,	26207,		PITPNC1,
224925_at	phosphatidylinositol-3,4,5-trisphosphate-dependent Rac exchange factor 1	20q13.13,	57580,	hsa04062:Chemokine signaling pathway,	prex1,	Framingham Heart Study 100K Project: genome-wide associations for blood pressure and arterial stiffness,
227088_at	phosphodiesterase 5A, cGMP-specific	4q25-q27,	8654,	hsa00230:Purine metabolism,	PDE5A,
1554789_a_at, 213228_at	phosphodiesterase 8B	5q14.1,	8622,	hsa00230:Purine metabolism,	PDE8B,	Pigmented nodular adrenocortical disease, primary, 3,
235149_at, 229553_at, 238417_at, 229256_at	phosphoglucomutase 2-like 1	11q13.4,	283209,	hsa00500:Starch and sucrose metabolism,	PGM2L1,
1560431_at	phosphoglucomutase 5 pseudogene 1	9q12,	653394,		PGM5P1,
201397_at	phosphoglycerate dehydrogenase	1p12,	26227,	hsa00260:Glycine, serine and threonine metabolism,	PHGDH,	Phosphoglycerate dehydrogenase deficiency,
221757_at, 221756_at, 1555632_at	phosphoinositide-3-kinase interacting protein 1	22q12.2,	113791,		Pik3ip1,
235980_at	phosphoinositide-3-kinase, catalytic, alpha polypeptide	3q26.3,	5290,	hsa00562:Inositol phosphate metabolism,hsa04012:ErbB signaling pathway,hsa04062:Chemokine signaling pathway,hsa04070:Phosphatidylinositol signaling system,hsa04150:mTOR signaling pathway,hsa04210:Apoptosis,hsa04370:VEGF signaling pathway,hsa04510:Focal adhesion,hsa04620:Toll-like receptor signaling pathway,hsa04630:Jak-STAT signaling pathway,hsa04650:Natural killer cell mediated cytotoxicity,hsa0…	PIK3CA,	Breast cancer,Breast cancer, somatic,Colorectal cancer,Colorectal cancer, somatic,Gastric cancer, somatic,Hepatocellular carcinoma, somatic,Keratosis, seborrheic, somatic,Nevus, epidermal,Nonsmall cell lung cancer, somatic,Ovarian cancer,Ovarian cancer, somatic,
217620_s_at	phosphoinositide-3-kinase, catalytic, beta polypeptide	3q22.3,	5291,	hsa00562:Inositol phosphate metabolism,hsa04012:ErbB signaling pathway,hsa04062:Chemokine signaling pathway,hsa04070:Phosphatidylinositol signaling system,hsa04150:mTOR signaling pathway,hsa04210:Apoptosis,hsa04370:VEGF signaling pathway,hsa04510:Focal adhesion,hsa04620:Toll-like receptor signaling pathway,hsa04630:Jak-STAT signaling pathway,hsa04650:Natural killer cell mediated cytotoxicity,hsa0…	Pik3cb,
241905_at	phosphoinositide-3-kinase, class 2, alpha polypeptide	11p15.5-p14,	5286,	hsa00562:Inositol phosphate metabolism,hsa04070:Phosphatidylinositol signaling system,	pik3c2a,
204484_at	phosphoinositide-3-kinase, class 2, beta polypeptide	1q32,	5287,	hsa00562:Inositol phosphate metabolism,hsa04070:Phosphatidylinositol signaling system,	PIK3C2B,
239300_at	phosphoinositide-3-kinase, class 3	18q12.3,	5289,	hsa00562:Inositol phosphate metabolism,hsa04070:Phosphatidylinositol signaling system,hsa04140:Regulation of autophagy,	PIK3C3,
212239_at, 212249_at	phosphoinositide-3-kinase, regulatory subunit 1 (alpha)	5q13.1,	5295,	hsa04012:ErbB signaling pathway,hsa04062:Chemokine signaling pathway,hsa04070:Phosphatidylinositol signaling system,hsa04150:mTOR signaling pathway,hsa04210:Apoptosis,hsa04370:VEGF signaling pathway,hsa04510:Focal adhesion,hsa04620:Toll-like receptor signaling pathway,hsa04630:Jak-STAT signaling pathway,hsa04650:Natural killer cell mediated cytotoxicity,hsa04660:T cell receptor signaling pathway,…	Pik3r1,
207105_s_at, 1568629_s_at	phosphoinositide-3-kinase, regulatory subunit 2 (beta)	19q13.2-q13.4,	5296,	hsa04012:ErbB signaling pathway,hsa04062:Chemokine signaling pathway,hsa04070:Phosphatidylinositol signaling system,hsa04150:mTOR signaling pathway,hsa04210:Apoptosis,hsa04370:VEGF signaling pathway,hsa04510:Focal adhesion,hsa04620:Toll-like receptor signaling pathway,hsa04630:Jak-STAT signaling pathway,hsa04650:Natural killer cell mediated cytotoxicity,hsa04660:T cell receptor signaling pathway,…	PIK3R2,
209785_s_at	phospholipase A2, group IVC (cytosolic, calcium-independent)	19q13.3,	8605,		PLA2G4C,
207222_at	phospholipase A2, group X	16p13.1-p12,	8399,	hsa00564:Glycerophospholipid metabolism,hsa00565:Ether lipid metabolism,hsa00590:Arachidonic acid metabolism,hsa00591:Linoleic acid metabolism,hsa00592:alpha-Linolenic acid metabolism,hsa04010:MAPK signaling pathway,hsa04270:Vascular smooth muscle contraction,hsa04370:VEGF signaling pathway,hsa04664:Fc epsilon RI signaling pathway,hsa04730:Long-term depression,hsa04912:GnRH signaling pathway,	PLA2G10,
213222_at	phospholipase C, beta 1 (phosphoinositide-specific)	20p12,	23236,	hsa00562:Inositol phosphate metabolism,hsa04020:Calcium signaling pathway,hsa04062:Chemokine signaling pathway,hsa04070:Phosphatidylinositol signaling system,hsa04270:Vascular smooth muscle contraction,hsa04310:Wnt signaling pathway,hsa04540:Gap junction,hsa04720:Long-term potentiation,hsa04730:Long-term depression,hsa04912:GnRH signaling pathway,hsa04916:Melanogenesis,hsa05010:Alzheimer's diseas…	PLCB1,
205111_s_at, 205112_at	phospholipase C, epsilon 1	10q23,	51196,	hsa00562:Inositol phosphate metabolism,hsa04020:Calcium signaling pathway,hsa04070:Phosphatidylinositol signaling system,	PLCE1,	Nephrotic syndrome, type 3,
205934_at	phospholipase C-like 1	2q33,	5334,		PLCL1,	Identification of PLCL1 gene for hip bone size variation in females in a genome-wide association study,Susceptibility loci for intracranial aneurysm in European and Japanese populations,
201050_at	phospholipase D family, member 3	19q13.2,	23646,		Pld3,
226636_at, 215723_s_at, 177_at, 1557126_a_at, 232530_at, 205203_at	phospholipase D1, phosphatidylcholine-specific	3q26,	5337,	hsa00564:Glycerophospholipid metabolism,hsa00565:Ether lipid metabolism,hsa04144:Endocytosis,hsa04666:Fc gamma R-mediated phagocytosis,hsa04912:GnRH signaling pathway,hsa05200:Pathways in cancer,hsa05212:Pancreatic cancer,	PLD1,
218901_at	phospholipid scramblase 4	3q24,	57088,		PLSCR4,
219066_at	phosphopantothenoylcysteine decarboxylase	15q24.2,	60490,	hsa00770:Pantothenate and CoA biosynthesis,	PPCDC,
1556715_at	phosphoribosyl pyrophosphate synthetase-associated protein 1	17q24-q25,	5635,		PRPSAP1,
238601_at	phosphorylase kinase, beta	16q12-q13,	5257,	hsa04020:Calcium signaling pathway,hsa04910:Insulin signaling pathway,	Phkb,	Phosphorylase kinase deficiency of liver and muscle, autosomal recessive,
203335_at	phytanoyl-CoA 2-hydroxylase	10p13,	5264,		phyH,	Refsum disease,
210650_s_at, 213558_at	piccolo (presynaptic cytomatrix protein)	7q11.23-q21.3,	27445,		PCLO,
209193_at	pim-1 oncogene	6p21.2,	5292,	hsa04630:Jak-STAT signaling pathway,hsa05221:Acute myeloid leukemia,	Pim1,
236982_at	pituitary tumor-transforming 1 interacting protein	21q22.3,	754,		Pttg1ip,
229385_s_at	placenta-specific 2 (non-protein coding)	19p13.3,	257000,		PLAC2,
201860_s_at	plasminogen activator, tissue	8p12,	5327,	hsa04610:Complement and coagulation cascades,	PLAT,	Hyperfibrinolysis, familial, due to increased release of PLAT,Plasminogen activator deficiency,Thrombophilia, familial, due to decreased release of PLAT,
230120_s_at, 214415_at, 205871_at	plasminogen-like B2; plasminogen-like B1	2p11-q11,2p11.2,	5342,5343,		PLGLB1,PLGLB2,
201215_at	plastin 3 (T isoform)	Xq23,	5358,		PLS3,
219304_s_at, 222860_s_at	platelet derived growth factor D	11q22.3,	80310,	hsa04510:Focal adhesion,hsa04540:Gap junction,hsa04810:Regulation of actin cytoskeleton,hsa05215:Prostate cancer,hsa05218:Melanoma,	PDGFD,
203355_s_at	pleckstrin and Sec7 domain containing 3	8pter-p23.3,	23362,	hsa04144:Endocytosis,	PSD3,
220952_s_at	pleckstrin homology domain containing, family A member 5	12p12,	54477,		PLEKHA5,
229245_at	pleckstrin homology domain containing, family A member 6	1q32.1,	22874,		PLEKHA6,
209504_s_at	pleckstrin homology domain containing, family B (evectins) member 1	11q13.5-q14.1,	58473,		PLEKHB1,
235360_at	pleckstrin homology domain containing, family M, member 3	2q33.3,	389072,		PLEKHM3,
205372_at	pleiomorphic adenoma gene 1	8q12,	5324,		PLAG1,	Adenomas, salivary gland pleomorphic,Many sequence variants affecting diversity of adult human height,Pleomorphic salivary gland adenoma,
209318_x_at	pleiomorphic adenoma gene-like 1	6q24-q25,	5325,		PLAGL1,	Diabetes mellitus, transient neonatal,
211737_x_at, 209465_x_at	pleiotrophin	7q33-q34,	5764,		PTN,
202240_at	polo-like kinase 1 (Drosophila)	16p12.1,	5347,	hsa04110:Cell cycle,hsa04114:Oocyte meiosis,hsa04914:Progesterone-mediated oocyte maturation,	PLK1,
224701_at	poly (ADP-ribose) polymerase family, member 14	3q21.1,	54625,		PARP14,
209940_at	poly (ADP-ribose) polymerase family, member 3	3p21.31-p21.1,	10039,	hsa03410:Base excision repair,	PARP3,
223220_s_at	poly (ADP-ribose) polymerase family, member 9	3q21,	83666,		PARP9,
221868_at	poly(A) binding protein interacting protein 2B	2p13.3,	400961,		Paip2b,
231838_at	poly(A) binding protein, cytoplasmic 1-like		80336,		PABPC1L,
228569_at	poly(A) polymerase alpha	14q32.31,	10914,	hsa03018:RNA degradation,	Papola,
222273_at	poly(A) polymerase gamma	2p16.1,	64895,	hsa03018:RNA degradation,	PAPOLG,
213263_s_at, 213517_at	poly(rC) binding protein 2	12q13.12-q13.13,	5094,		PCBP2,
226326_at	polycomb group ring finger 5	10q23.32,	84333,		PCGF5,
238992_at	polymerase (DNA directed) iota	18q21.1,	11201,		poli,
242804_at	polymerase (DNA directed) nu	4p16.3,	353497,		POLN,
223269_at	polymerase (RNA) III (DNA directed) polypeptide G (32kD)-like	1q21.1,	84265,	hsa00230:Purine metabolism,hsa00240:Pyrimidine metabolism,hsa03020:RNA polymerase,hsa04623:Cytosolic DNA-sensing pathway,	Polr3gl,
226493_at	potassium channel tetramerisation domain containing 18	2q33.1,	130535,		Kctd18,
223176_at	potassium channel tetramerisation domain containing 20	6p21.31,	222658,		KCTD20,
241903_at	potassium channel tetramerisation domain containing 3	1q41,	51133,		KCTD3,
222315_at	potassium inwardly-rectifying channel, subfamily J, member 15	21q22.2,	3772,		KCNJ15,
222857_s_at	potassium large conductance calcium-activated channel, subfamily M, beta member 4	12q,	27345,	hsa04270:Vascular smooth muscle contraction,	KCNMB4,
210078_s_at, 230605_at	potassium voltage-gated channel, shaker-related subfamily, beta member 1	3q26.1,	7881,		KCNAB1,	Genetic correlates of longevity and selected age-related phenotypes: a genome-wide association study in the Framingham Study,
201133_s_at	praja ring finger 2	5q21.3,	9867,		pja2,
212148_at, 212151_at	pre-B-cell leukemia homeobox 1	1q23,	5087,		PBX1,	Leukemia, acute pre-B-cell,
212259_s_at, 214177_s_at, 207838_x_at, 214176_s_at	pre-B-cell leukemia homeobox interacting protein 1	1q21.3,	57326,		Pbxip1,
210908_s_at, 207132_x_at	prefoldin subunit 5	12q12,	5204,		PFDN5,
203803_at, 225274_at	prenylcysteine oxidase 1	2p13.3,	51449,		PCYOX1,
226065_at, 226069_at, 230708_at	prickle homolog 1 (Drosophila)	12q12,	144165,	hsa04310:Wnt signaling pathway,	PRICKLE1,	Epilepsy, progressive myoclonic 1B,
202465_at	procollagen C-endopeptidase enhancer	7q22,	5118,		Pcolce,
228554_at	progesterone receptor	11q22-q23,	5241,	hsa04114:Oocyte meiosis,hsa04914:Progesterone-mediated oocyte maturation,	PGR,
201701_s_at, 213227_at	progesterone receptor membrane component 2	4q26,	10424,		PGRMC2,
219236_at	progestin and adipoQ receptor family member VI	1q22,	79957,		PAQR6,
242123_at	progestin and adipoQ receptor family member VII	1p36.11,	164091,		PAQR7,
227626_at	progestin and adipoQ receptor family member VIII	6p12.1,	85315,		PAQR8,
212593_s_at, 212594_at, 202730_s_at, 1557166_at, 202731_at	programmed cell death 4 (neoplastic transformation inhibitor)	10q24,	27250,		PDCD4,
206509_at	prolactin-induced protein	7q34,	5304,		pip,
214203_s_at	proline dehydrogenase (oxidase) 1	22q11.21,	5625,	hsa00330:Arginine and proline metabolism,	PRODH,	Hyperprolinemia, type I,Schizophrenia, susceptibility to, 4,Schizophrenia, susceptibility to, 4} 600850,
220014_at	proline rich 16	5q23.1,	51334,		Prr16,
209034_at	proline-rich nuclear receptor coactivator 1	6q15,	10957,		PNRC1,
230054_at	proline-rich transmembrane protein 1	6p21.32,	80863,		Prrt1,
227192_at	proline-rich transmembrane protein 2	16p11.2,	112476,		PRRT2,
201896_s_at	proline/serine-rich coiled-coil 1	1p13.3,	84722,		Psrc1,	Common variants at 30 loci contribute to polygenic dyslipidemia,Genome-wide association analysis of metabolic traits in a birth cohort from a founder population,Genome-wide association study identifies genes for biomarkers of cardiovascular disease: serum urate and dyslipidemia,Genomewide association analysis of coronary artery disease,LDL-cholesterol concentrations: a genome-wide association stu…
201494_at, 231588_at	prolylcarboxypeptidase (angiotensinase C)	11q14,	5547,		prcp,
204304_s_at	prominin 1	4p15.32,	8842,		PROM1,	Cone-rod dystrophy 12,Macular dystrophy 2, Bull's eye,Macular dystrophy, retinal, 2,Retinal degeneration, autosomal recessive, prominin-related,Retinitis pigmentosa-41,Stargardt disease 4,
1552797_s_at	prominin 2	2q11.1,	150696,		PROM2,
203860_at	propionyl Coenzyme A carboxylase, alpha polypeptide	13q32,	5095,	hsa00280:Valine, leucine and isoleucine degradation,hsa00640:Propanoate metabolism,	pccA,	Propionicacidemia,
200866_s_at, 200871_s_at	prosaposin	10q21-q22,	5660,	hsa04142:Lysosome,	PSAP,	Combined SAP deficiency,Gaucher disease, atypical,Krabbe disease, atypical,Metachromatic leukodystrophy due to deficiency of SAP-1,Metachromatic leukodystrophy due to SAP-b deficiency,
210367_s_at	prostaglandin E synthase	9q34.3,	9536,	hsa00590:Arachidonic acid metabolism,	PTGES,
205319_at	prostate stem cell antigen	8q24.2,	8000,		PSCA,
212032_s_at	prostate tumor overexpressed 1	19q13.33,	53635,		PTOV1,
208165_s_at	protease, serine, 16 (thymus)	6p21,	10279,		Prss16,
229441_at, 226279_at	protease, serine, 23	11q14.1,	11098,		prss23,
202525_at	protease, serine, 8	16p11.2,	5652,		PRSS8,
238890_at	proteasome (prosome, macropain) assembly chaperone 1	21q22.3,	8624,		PSMG1,	Loci on 20q13 and 21q22 are associated with pediatric-onset inflammatory bowel disease,
202659_at	proteasome (prosome, macropain) subunit, beta type, 10	16q22.1,	5699,	hsa03050:Proteasome,	PSMB10,
204279_at	proteasome (prosome, macropain) subunit, beta type, 9 (large multifunctional peptidase 2)	6p21.3,	5698,	hsa03050:Proteasome,	psmb9,
204572_s_at, 214225_at	protein (peptidylprolyl cis/trans isomerase) NIMA-interacting, 4 (parvulin)	Xq13,	5303,		PIN4,
207808_s_at	protein S (alpha)	3q11.2,	5627,	hsa04610:Complement and coagulation cascades,	proS1,	Protein S deficiency,Thrombophilia due to protein S deficiency,
221564_at	protein arginine methyltransferase 2	21q22.3,	3275,		PRMT2,
217863_at, 217862_at	protein inhibitor of activated STAT, 1	15q,	8554,	hsa04120:Ubiquitin mediated proteolysis,hsa04630:Jak-STAT signaling pathway,hsa05200:Pathways in cancer,hsa05222:Small cell lung cancer,	PIAS1,
231120_x_at, 223551_at	protein kinase (cAMP-dependent, catalytic) inhibitor beta	6q22.31,	5570,		Pkib,
205880_at	protein kinase D1	14q11,	5587,		PRKD1,
225278_at, 1558027_s_at	protein kinase, AMP-activated, beta 2 non-catalytic subunit	1q21.1,	5565,	hsa04910:Insulin signaling pathway,hsa04920:Adipocytokine signaling pathway,hsa05410:Hypertrophic cardiomyopathy (HCM),	PRKAB2,
228620_at, 228714_at	protein kinase, interferon-inducible double stranded RNA dependent activator	2q31.2,	8575,		PRKRA,	Dystonia 16,
228108_at	protein phosphatase 1 (formerly 2C)-like	3q26.1,	151742,		Ppm1l,
1557630_s_at	protein phosphatase 1, regulatory (inhibitor) subunit 12A	12q15-q21,	4659,	hsa04270:Vascular smooth muscle contraction,hsa04510:Focal adhesion,hsa04720:Long-term potentiation,hsa04810:Regulation of actin cytoskeleton,	PPP1R12A,
227006_at	protein phosphatase 1, regulatory (inhibitor) subunit 14A	19q13.1,	94274,	hsa04270:Vascular smooth muscle contraction,	Ppp1r14a,
236754_at	protein phosphatase 1, regulatory (inhibitor) subunit 2	3q29,	5504,		Ppp1r2,
222662_at	protein phosphatase 1, regulatory (inhibitor) subunit 3B	8p23.1,	79660,	hsa04910:Insulin signaling pathway,	PPP1R3B,
204284_at	protein phosphatase 1, regulatory (inhibitor) subunit 3C	10q23-q24,	5507,	hsa04910:Insulin signaling pathway,	Ppp1r3c,
204554_at	protein phosphatase 1, regulatory (inhibitor) subunit 3D	20q13.3,	5509,	hsa04910:Insulin signaling pathway,	PPP1R3D,
229001_at, 227412_at	protein phosphatase 1, regulatory (inhibitor) subunit 3E	14q11.2,	90673,		Ppp1r3e,
221088_s_at, 228494_at	protein phosphatase 1, regulatory (inhibitor) subunit 9A	7q21.3,	55607,		ppp1r9a,
210407_at, 227728_at	protein phosphatase 1A (formerly 2C), magnesium-dependent, alpha isoform	14q23.1,	5494,	hsa04010:MAPK signaling pathway,	PPM1A,
236302_at	protein phosphatase 1E (PP2C domain containing)	17q22,	22843,		PPM1E,	Genetic correlates of brain aging on MRI and cognitive test measures: a genome-wide association and linkage analysis in the Framingham Study,
212686_at	protein phosphatase 1H (PP2C domain containing)	12q14.1-q14.2,	57460,		ppm1h,
235061_at	protein phosphatase 1K (PP2C domain containing)	4q22.1,	152926,		Ppm1k,	Does parental expressed emotion moderate genetic effects in ADHD? An exploration using a genome wide association scan,
215586_at	protein phosphatase 3 (formerly 2B), catalytic subunit, beta isoform	10q21-q22,	5532,	hsa04010:MAPK signaling pathway,hsa04020:Calcium signaling pathway,hsa04114:Oocyte meiosis,hsa04210:Apoptosis,hsa04310:Wnt signaling pathway,hsa04360:Axon guidance,hsa04370:VEGF signaling pathway,hsa04650:Natural killer cell mediated cytotoxicity,hsa04660:T cell receptor signaling pathway,hsa04662:B cell receptor signaling pathway,hsa04720:Long-term potentiation,hsa05010:Alzheimer's disease,hsa05…	PPP3CB,
214373_at	protein phosphatase 4, regulatory subunit 2	3p13,	151987,		PPP4R2,
206574_s_at	protein tyrosine phosphatase type IVA, member 3	8q24.3,	11156,		ptp4a3,
243792_x_at	protein tyrosine phosphatase, non-receptor type 13 (APO-1/CD95 (Fas)-associated phosphatase)	4q21.3,	5783,		PTPN13,
206687_s_at	protein tyrosine phosphatase, non-receptor type 6	12p13,	5777,	hsa04520:Adherens junction,hsa04630:Jak-STAT signaling pathway,hsa04650:Natural killer cell mediated cytotoxicity,hsa04660:T cell receptor signaling pathway,hsa04662:B cell receptor signaling pathway,	PTPN6,
200637_s_at	protein tyrosine phosphatase, receptor type, F	1p34,	5792,	hsa04514:Cell adhesion molecules (CAMs),hsa04520:Adherens junction,hsa04910:Insulin signaling pathway,	ptprf,
233609_at	protein tyrosine phosphatase, receptor type, K	6q22.2-q22.3,	5796,		PTPRK,
235507_at, 244706_at, 232382_s_at, 238902_at, 226119_at	protein-L-isoaspartate (D-aspartate) O-methyltransferase domain containing 1	8q11.23,	115294,		PCMTD1,
237179_at, 212406_s_at	protein-L-isoaspartate (D-aspartate) O-methyltransferase domain containing 2	20q13.33,	55251,		pcmtd2,
228640_at	protocadherin 7	4p15,	5099,		PCDH7,
223854_at	protocadherin beta 10; protocadherin beta 9	5q31,	56126,56127,		PCDHB10,PCDHB9,
231726_at	protocadherin beta 14	5q31,	56122,		PCDHB14,
204788_s_at	protoporphyrinogen oxidase	1q22,	5498,	hsa00860:Porphyrin and chlorophyll metabolism,	PPOX,	Porphyria variegata,
210988_s_at, 209586_s_at, 209599_s_at	prune homolog (Drosophila)	1q21,	58497,	hsa00230:Purine metabolism,	PRUNE,
229362_at	pseudouridylate synthase 10	2p16.1,	150962,		PUS10,
223712_at	pterin-4 alpha-carbinolamine dehydratase/dimerization cofactor of hepatocyte nuclear factor 1 alpha (TCF1) 2	5q31.1,	84105,		pcbd2,	Many sequence variants affecting diversity of adult human height,
226762_at	purine-rich element binding protein B	7p13,	5814,		purb,
1566671_a_at	pyridoxal (pyridoxine, vitamin B6) kinase	21q22.3,	8566,	hsa00750:Vitamin B6 metabolism,	pdxK,
202590_s_at	pyruvate dehydrogenase kinase, isozyme 2	17q21.33,	5164,		PDK2,
1562321_at, 205960_at, 225207_at	pyruvate dehydrogenase kinase, isozyme 4	7q21.3,	5166,		PDK4,
224904_at	pyruvate dehydrogenase phosphatase regulatory subunit	16q22.1,	55066,		PDPR,
232861_at	pyruvate dehyrogenase phosphatase catalytic subunit 2	16q22.1,	57546,		PDP2,
209051_s_at, 209050_s_at	ral guanine nucleotide dissociation stimulator	9q34.3,	5900,	hsa05200:Pathways in cancer,hsa05210:Colorectal cancer,hsa05212:Pancreatic cancer,	RALGDS,
209568_s_at	ral guanine nucleotide dissociation stimulator-like 1	1q25.3,	23179,		RGL1,	Conduct disorder and ADHD: Evaluation of conduct problems as a categorical and quantitative trait in the international multicentre ADHD genetics study,
1555233_at, 235489_at	ras homolog gene family, member J	14q23.2,	57381,		RHOJ,
212122_at	ras homolog gene family, member Q; similar to small GTP binding protein TC10	2p21,2q21.1,	23433,730041,	hsa04910:Insulin signaling pathway,	rhoq,RHOQP2,
223168_at	ras homolog gene family, member U	1q42.11-q42.3,	58480,		RHOU,	Common variants on 1p36 and 1q42 are associated with cutaneous basal cell carcinoma but not with melanoma or pigmentation traits,
204364_s_at	receptor accessory protein 1	2p11.2,	65055,		REEP1,	Spastic paraplegia 31,
208873_s_at	receptor accessory protein 5	5q22-q23,	7905,		REEP5,
226597_at	receptor accessory protein 6	19p13.3,	92840,		REEP6,
205923_at	reelin	7q22,	5649,	hsa04510:Focal adhesion,hsa04512:ECM-receptor interaction,	RELN,	Genome-wide association analysis of susceptibility and clinical phenotype in multiple sclerosis,Genome-Wide Association Identifies a Common Variant in the Reelin Gene That Increases the Risk of Schizophrenia Only in Women,Lissencephaly syndrome, Norman-Roberts type,
204730_at	regulating synaptic membrane exocytosis 3	1pter-p22.2,	9783,		RIMS3,
202388_at	regulator of G-protein signaling 2, 24kDa	1q31,	5997,		RGS2,
204759_at	regulator of chromosome condensation (RCC1) and BTB (POZ) domain containing protein 2	13q14.3,	1102,		rcbtb2,
229885_at, 235381_at	remodeling and spacing factor 1	11q14.1,	51773,		rsf1,
203485_at	reticulon 1	14q23.1,	6252,		RTN1,
212332_at, 212331_at	retinoblastoma-like 2 (p130)	16q12.2,	5934,	hsa04110:Cell cycle,hsa04350:TGF-beta signaling pathway,	RBL2,
221872_at	retinoic acid receptor responder (tazarotene induced) 1	3q25.32-q25.33,	5918,		RARRES1,
204070_at	retinoic acid receptor responder (tazarotene induced) 3	11q23,	5920,		rarres3,
202426_s_at, 202449_s_at	retinoid X receptor, alpha	9q34.3,	6256,	hsa03320:PPAR signaling pathway,hsa04920:Adipocytokine signaling pathway,hsa05200:Pathways in cancer,hsa05216:Thyroid cancer,hsa05222:Small cell lung cancer,hsa05223:Non-small cell lung cancer,	RXRA,
215098_at, 215099_s_at, 209148_at	retinoid X receptor, beta	6p21.3,	6257,	hsa03320:PPAR signaling pathway,hsa04920:Adipocytokine signaling pathway,hsa05200:Pathways in cancer,hsa05216:Thyroid cancer,hsa05222:Small cell lung cancer,hsa05223:Non-small cell lung cancer,	Rxrb,
236291_at	retinol dehydrogenase 5 (11-cis/9-cis)	12q13-q14,	5959,	hsa00830:Retinol metabolism,	RDH5,	Fundus albipunctatus,
218124_at	retinol saturase (all-trans-retinol 13,14-reductase)	2p11.2,	54884,	hsa00830:Retinol metabolism,	retsat,
205407_at	reversion-inducing-cysteine-rich protein with kazal motifs	9p13.3,	8434,		RECK,
229285_at	ribonuclease L (2',5'-oligoisoadenylate synthetase-dependent)	1q25,	6041,		RNASEL,	Prostate cancer 1, 176807,
205158_at, 213397_x_at	ribonuclease, RNase A family, 4	14q11.1,	6038,		Rnase4,
242870_at, 226164_x_at	ribosomal modification protein rimK-like family member B	12p13.31,	57494,		RIMKLB,
219138_at	ribosomal protein L14	3p22-p21.2,	9045,	hsa03010:Ribosome,	rpl14,
221476_s_at, 217266_at, 240806_at	ribosomal protein L15 pseudogene 22; ribosomal protein L15 pseudogene 18; ribosomal protein L15 pseudogene 17; ribosomal protein L15 pseudogene 3; ribosomal protein L15 pseudogene 7; ribosomal protein L15	12p13.31,13q32.3,22q12.1,3p24.2,4p12,6p24.1,	100130624,6138,653232,728002,728088,728576,	hsa03010:Ribosome,	RPL15,RPL15P17,RPL15P18,RPL15P22,RPL15P3,RPL15P7,
212044_s_at	ribosomal protein L27a	11p15,	6157,	hsa03010:Ribosome,	RPL27A,
200962_at	ribosomal protein L31 pseudogene 49; ribosomal protein L31 pseudogene 17; ribosomal protein L31	12q24.11,2q11.2,2q36.1,	100129882,6160,653773,	hsa03010:Ribosome,	rpl31,RPL31P17,RPL31P49,
238026_at	ribosomal protein L35a	3q29-qter,	6165,	hsa03010:Ribosome,	RpL35A,	Diamond-Blackfan anemia 5,
224763_at	ribosomal protein L37	5p13,	6167,	hsa03010:Ribosome,	RPL37,
214041_x_at	ribosomal protein L37a	2q35,	6168,	hsa03010:Ribosome,	RPL37A,
221943_x_at, 202028_s_at	ribosomal protein L38	17q23-q25,	6169,	hsa03010:Ribosome,	RPL38,
213350_at	ribosomal protein S11 pseudogene 5; ribosomal protein S11	12q24.33,19q13.3,	6205,727826,	hsa03010:Ribosome,	rps11,RPS11P5,
235309_at	ribosomal protein S15a pseudogene 17; ribosomal protein S15a pseudogene 19; ribosomal protein S15a pseudogene 12; ribosomal protein S15a pseudogene 24; ribosomal protein S15a pseudogene 11; ribosomal protein S15a	16p,1p34.1,1q41,4q13.1,6p21.31,8p12,	100129243,391656,6210,644790,646819,648729,	hsa03010:Ribosome,	RPS15A,RPS15AP11,RPS15AP12,RPS15AP17,RPS15AP19,RPS15AP24,
216247_at	ribosomal protein S20	8q12,	6224,	hsa03010:Ribosome,	rps20,	Many sequence variants affecting diversity of adult human height,
222487_s_at	ribosomal protein S27-like	15q22.2,	51065,	hsa03010:Ribosome,	Rps27l,
238824_at	ribosomal protein S29 pseudogene 11; ribosomal protein S29 pseudogene 16; ribosomal protein S29 pseudogene 17; ribosomal protein S29 pseudogene 3; ribosomal protein S29 pseudogene 9; ribosomal protein S29	14q,2q33.3,3q29,4p15.2,7q22.1,9p13.3,	100129379,100129902,100132499,6235,642892,648343,	hsa03010:Ribosome,	RPS29,RPS29P11,RPS29P16,RPS29P17,RPS29P3,RPS29P9,
204633_s_at, 204635_at	ribosomal protein S6 kinase, 90kDa, polypeptide 5	14q31-q32.1,	9252,	hsa04010:MAPK signaling pathway,hsa04722:Neurotrophin signaling pathway,hsa05219:Bladder cancer,	RPS6KA5,
237081_at	ribosomal protein SA pseudogene 49	9q22.1,	401537,		RPSAP49,
239383_at	ring finger protein 115	1q21.1,	27246,		RNF115,
223591_at, 223592_s_at	ring finger protein 135	17q11.2,	84282,		RNF135,	Many sequence variants affecting diversity of adult human height,Overgrowth syndrome,
226106_at	ring finger protein 141	11p15.4,	50862,		RNF141,
228153_at	ring finger protein 144B	6p22.3,	255488,		Rnf144b,
221430_s_at	ring finger protein 146	6q22.1-q22.33,	81847,		RNF146,	Genome-wide association study provides evidence for a breast cancer risk locus at 6q22.33,
227657_at	ring finger protein 150	4q31.21,	57484,		Rnf150,
226104_at, 220985_s_at	ring finger protein 170	8p11.21,	81790,		Rnf170,
230000_at	ring finger protein 213	17q25.3,	57674,		RNF213,
220991_s_at	ring finger protein 32	7q36,	140545,		rnf32,
222660_s_at	ring finger protein 38	9p13,	152006,		Rnf38,
242121_at	ring finger protein, LIM domain interacting; similar to ring finger protein (C3H2C3 type) 6	15q21.2,Xq13-q21,	51132,645453,		LOC645453,RLIM,
221908_at	ring finger protein, transmembrane 2	12q24.22,	84900,		Rnft2,
222790_s_at, 213694_at, 222788_s_at, 222791_at	round spermatid basic protein 1	1p13.2,	54665,		RSBN1,
201646_at, 201647_s_at, 215754_at, 224983_at	scavenger receptor class B, member 2	4q21.1,	950,	hsa04142:Lysosome,	scarb2,	Action myoclonus-renal failure syndrome,
1552365_at	scinderin	7p21.3,	85477,	hsa04666:Fc gamma R-mediated phagocytosis,hsa04810:Regulation of actin cytoskeleton,	Scin,
206799_at	secretoglobin, family 1D, member 2	11q13,	10647,		SCGB1D2,
205979_at	secretoglobin, family 2A, member 1	11q13,	4246,		Scgb2a1,
218720_x_at, 233337_s_at	seizure related 6 homolog (mouse)-like 2	16p11.2,	26470,		sez6l2,
233267_at, 214433_s_at	selenium binding protein 1	1q21-q22,	8991,		SELENBP1,
226051_at	selenoprotein M	22q12.2,	140606,		SELM,
201427_s_at, 231669_at	selenoprotein P, plasma, 1	5q31,	6414,		SEPP1,
206941_x_at	sema domain, immunoglobulin domain (Ig), short basic domain, secreted, (semaphorin) 3E	7q21.11,	9723,	hsa04360:Axon guidance,	Sema3e,	CHARGE syndrome,
203528_at	sema domain, immunoglobulin domain (Ig), transmembrane domain (TM) and short cytoplasmic domain, (semaphorin) 4D	9q22.2,	10507,	hsa04360:Axon guidance,	SEMA4D,
226492_at	sema domain, transmembrane domain (TM), and cytoplasmic domain, (semaphorin) 6D	15q21.1,	80031,	hsa04360:Axon guidance,	SEMA6D,
1559038_at	septin 2	2q37,	4735,		SEPT2,
214298_x_at	septin 6	Xq24,	23157,		Sept6,
213112_s_at, 201471_s_at, 244804_at, 239004_at	sequestosome 1	5q35,	8878,		sqstm1,	Paget disease of bone,
218217_at	serine carboxypeptidase 1	17q22,	59342,		Scpep1,
225095_at	serine palmitoyltransferase, long chain base subunit 2	14q24.3-q31,	9517,	hsa00600:Sphingolipid metabolism,	Sptlc2,
205185_at	serine peptidase inhibitor, Kazal type 5	5q32,	11005,		SPINK5,	Atopy,Netherton syndrome,
219205_at, 219204_s_at, 222844_s_at	serine racemase	17p13,	63826,	hsa00260:Glycine, serine and threonine metabolism,	srr,
208610_s_at, 216629_at	serine/arginine repetitive matrix 2; hypothetical LOC100132779	16p13.3,	100132779,23524,		LOC100132779,SRRM2,
226166_x_at	serine/threonine kinase 36, fused homolog (Drosophila)	2q35,	27148,	hsa04340:Hedgehog signaling pathway,hsa05200:Pathways in cancer,hsa05217:Basal cell carcinoma,	STK36,
202951_at, 216727_at, 216451_at, 1553117_a_at, 1557145_at	serine/threonine kinase 38	6p21,	11329,		stk38,
212565_at	serine/threonine kinase 38 like	12p11.23,	23012,		stk38l,
243963_at	serologically defined colon cancer antigen 8	1q43-q44,	10806,		sdccag8,
228726_at, 213572_s_at, 212268_at	serpin peptidase inhibitor, clade B (ovalbumin), member 1	6p25,	1992,		SERPINB1,
200986_at	serpin peptidase inhibitor, clade G (C1 inhibitor), member 1	11q12-q13.1,	710,	hsa04610:Complement and coagulation cascades,	SERPING1,	Angioedema, hereditary,Angioedema, hereditary, types I and II,Complement component 4, partial deficiency of,
243264_s_at, 227627_at, 220038_at	serum/glucocorticoid regulated kinase family, member 3	8q12.3-q13.1,	23678,		SGK3,
218346_s_at	sestrin 1	6q21,	27244,	hsa04115:p53 signaling pathway,	sesn1,
225123_at	sestrin 3	11q21,	143686,	hsa04115:p53 signaling pathway,	SESN3,
210135_s_at	short stature homeobox 2	3q25-q26.1,	6474,		shox2,
235425_at	shugoshin-like 2 (S. pombe)	2q33.1,	151246,		SGOL2,
224391_s_at	sialic acid acetylesterase	11q24,	54414,		SIAE,
208926_at	sialidase 1 (lysosomal sialidase)	6p21.3,	4758,	hsa00511:Other glycan degradation,hsa00600:Sphingolipid metabolism,hsa04142:Lysosome,	Neu1,	Sialidosis, type I,Sialidosis, type II,
220974_x_at	sideroflexin 3	10q24.31,	81855,		SFXN3,
219197_s_at	signal peptide, CUB domain, EGF-like 2	11p15.3,	57758,		scube2,
209969_s_at	signal transducer and activator of transcription 1, 91kDa	2q32.2,	6772,	hsa04062:Chemokine signaling pathway,hsa04620:Toll-like receptor signaling pathway,hsa04630:Jak-STAT signaling pathway,hsa05200:Pathways in cancer,hsa05212:Pancreatic cancer,	STAT1,	Mycobacterial infection, atypical, familial disseminated,STAT1 deficiency, complete,
217199_s_at, 225636_at, 205170_at	signal transducer and activator of transcription 2, 113kDa	12q13.2,	6773,	hsa04062:Chemokine signaling pathway,hsa04630:Jak-STAT signaling pathway,	STAT2,
225289_at	signal transducer and activator of transcription 3 (acute-phase response factor)	17q21.31,	6774,	hsa04062:Chemokine signaling pathway,hsa04630:Jak-STAT signaling pathway,hsa04920:Adipocytokine signaling pathway,hsa05200:Pathways in cancer,hsa05212:Pancreatic cancer,hsa05221:Acute myeloid leukemia,	Stat3,	Genome-wide assocation defines more than 30 distinct susceptibility loci for Crohn's disease,Hyperimmunoglobulin E recurrent infection syndrome,Hyperimmunoglobulin E recurrent infection syndrome, autosomal dominant,Job syndrome,
226558_at	similar to CG32820-PA, isoform A	4,	653071,		LOC653071,
1555888_at	similar to E3 ubiquitin protein ligase, HECT domain containing, 1; ubiquitin protein ligase E3 component n-recognin 5	8,8q22,	51366,730429,	hsa04120:Ubiquitin mediated proteolysis,	LOC730429,UBR5,
239792_at	similar to FLJ16518 protein	15q24.1,	440288,		LOC440288,
235613_at	similar to Glycine cleavage system H protein, mitochondrial precursor; glycine cleavage system protein H (aminomethyl carrier); similar to Glycine cleavage system H protein, mitochondrial	16q23.2,19,1q24.2,5q31.3,	2653,654085,729080,730107,		GCSH,LOC654085,LOC729080,LOC730107,	Glycine encephalopathy,
230815_at	similar to KIF27C	9q21.33,	389765,		LOC389765,
206600_s_at	similar to MCT; solute carrier family 16, member 5 (monocarboxylic acid transporter 6)	17q25.1,	100133772,9121,		LOC100133772,SLC16A5,
227223_at	similar to RNA binding motif protein 39; RNA binding motif protein 39	20q11.22,Xp11.3,	643167,9584,		LOC643167,Rbm39,
220167_s_at	similar to TP53 target 3; TP53 target 3; similar to TP53TG3 protein	16p11.2,16p13,	24150,653550,729264,729355,		LOC653550,LOC729264,TP53TG3,TP53TG3B,
212706_at	similar to calcium-promoted Ras inactivator	7q22.1,	100132214,		LOC100132214,
200912_s_at, 1556350_a_at, 1555996_s_at	similar to eukaryotic translation initiation factor 4A2; eukaryotic translation initiation factor 4A, isoform 2	3q28,Xp11.22,	1974,286512,		EIF4A2,LOC286512,
219599_at, 211937_at	similar to eukaryotic translation initiation factor 4H; eukaryotic translation initiation factor 4B	12q13.13,Xq23,	1975,643873,	hsa04150:mTOR signaling pathway,	EIF4B,EIF4BP7,
213187_x_at, 212788_x_at	similar to ferritin, light polypeptide; ferritin, light polypeptide	19q13.3,19q13.3-q13.4|19q13.3,Xp21.2,	2512,392437,		FTL,FTLP2,	Basal ganglia disease, adult-onset,Hyperferritinemia-cataract syndrome,
232140_at	similar to hCG1989297	9q12,	100132352,		LOC100132352,
229231_at	similar to hCG1991475; leucine rich repeat containing 37B	17q11.2,	114659,646030,		LOC646030,LRRC37B,
208735_s_at, 238999_at, 203445_s_at	similar to hCG2013701; CTD (carboxy-terminal domain, RNA polymerase II, polypeptide A) small phosphatase 2	12q13-q15,7q31.1,	100128056,10106,		CTDSP2,LOC100128056,
230292_at	similar to hCG2020760	13q14.2,	100131993,		LOC100131993,
235691_at	similar to hCG2028352	1p21.3,	729970,		LOC729970,
236042_at	similar to hCG2041987	12p13.33,	100130219,		LOC100130219,
228245_s_at	similar to hCG38149	12p13.31,	728715,		LOC728715,
217122_s_at, 215169_at	similar to solute carrier family 35, member E2	1p36.33,	728661,
203221_at, 203222_s_at, 203220_s_at, 228284_at	similar to transducin-like enhancer of split 1 (E(sp1) homolog, Drosophila); transducin-like enhancer of split 1 (E(sp1) homolog, Drosophila)	9q21.32,Xq11.1,	645381,7088,		LOC645381,TLE1,
220617_s_at, 225021_at	similar to zinc finger protein 347; zinc finger protein 532	18q21.32,2q13,	442041,55205,		LOC442041,znf532,
218974_at	sine oculis binding protein homolog (Drosophila)	6q21,	55084,		Sobp,
203787_at, 210829_s_at	single-stranded DNA binding protein 2	5q14.1,	23635,		SSBP2,
1558331_at	sirtuin (silent mating type information regulation 2 homolog) 2 (S. cerevisiae)	19q13,	22933,		Sirt2,
220047_at, 222248_s_at	sirtuin (silent mating type information regulation 2 homolog) 4 (S. cerevisiae)	12q,	23409,		SIRT4,
230130_at	slit homolog 2 (Drosophila)	4p15.2,	9353,	hsa04360:Axon guidance,	Slit2,	Genome-wide association of echocardiographic dimensions, brachial artery endothelial function and treadmill exercise responses in the Framingham Heart Study,
244786_at	small Cajal body-specific RNA 13; small nucleolar RNA host gene 10 (non-protein coding)	14q32.12,14q32.13,	283596,677768,		SCARNA13,Snhg10,
217538_at	small G protein signaling modulator 2	17p13.3,	9905,		SGSM2,
229712_at	small nuclear RNA activating complex, polypeptide 3, 50kDa	9p22.3,	6619,		Snapc3,
217264_s_at, 203453_at, 215026_x_at	sodium channel, nonvoltage-gated 1 alpha	12p13,	6337,	hsa04742:Taste transduction,hsa04960:Aldosterone-regulated sodium reabsorption,	SCNN1A,	Pseudohypoaldosteronism, type I,
241436_at	sodium channel, nonvoltage-gated 1, gamma	16p12,	6340,	hsa04742:Taste transduction,hsa04960:Aldosterone-regulated sodium reabsorption,	SCNN1G,	Liddle syndrome,Pseudohypoaldosteronism, type I,
205316_at	solute carrier family 15 (H+/peptide transporter), member 2	3q13.33,	6565,		Slc15a2,
221024_s_at	solute carrier family 2 (facilitated glucose transporter), member 10	20q13.1,	81031,		SLC2A10,	Arterial tortuosity syndrome,
1558540_s_at	solute carrier family 2 (facilitated glucose transporter), member 11	22q11.2,	66035,		SLC2A11,
235050_at, 244353_s_at	solute carrier family 2 (facilitated glucose transporter), member 12	6q23.2,	154091,		SLC2A12,
206081_at	solute carrier family 24 (sodium/potassium/calcium exchanger), member 1	15q22,	9187,		SLC24A1,
226010_at, 220182_at	solute carrier family 25 (mitochondrial carrier; phosphate carrier), member 23	19p13.3,	79085,		SLC25A23,
1554161_at, 230624_at, 1552774_a_at	solute carrier family 25, member 27	6p11.2-q12,	9481,		SLC25A27,
201917_s_at, 237741_at	solute carrier family 25, member 36	3q23,	55186,		SLC25A36,	Genome-wide association analysis of susceptibility and clinical phenotype in multiple sclerosis,
226831_at	solute carrier family 25, member 46	5q22.1,	91137,		SLC25A46,
239006_at	solute carrier family 26, member 7	8q23,	115111,		SLC26A7,
226728_at	solute carrier family 27 (fatty acid transporter), member 1	19p13.11,	376497,	hsa03320:PPAR signaling pathway,	SLC27A1,
219344_at	solute carrier family 29 (nucleoside transporters), member 3; Sp9 transcription factor homolog (mouse)	10q22.1,2q31.1,	100131390,55315,		Slc29a3,Sp9,	Hyperpigmentation, cutaneous, with hypertrichosis, hepatosplenomegaly, heart anomalies, hearing loss,
212907_at, 228181_at	solute carrier family 30 (zinc transporter), member 1	1q32-q41,	7779,		slc30a1,
227193_at	solute carrier family 30 (zinc transporter), member 4	15q11.2-q21.3,15q11.2-q21.3|15q21.1,	7782,		SLC30A4,
231437_at, 233325_at	solute carrier family 35, member D2	9q22.32,	11046,		SLC35D2,
243709_at	solute carrier family 38, member 9	5q11.2,	153129,		slc38a9,
227046_at	solute carrier family 39 (metal ion transporter), member 11	17q24.3-q25.1,	201266,		Slc39a11,
226444_at	solute carrier family 39 (zinc transporter), member 10	2q32.3,	57181,		SLC39A10,
228935_at, 207056_s_at	solute carrier family 4, sodium bicarbonate cotransporter, member 8	12q13.13,	9498,		SLC4A8,
223748_at	solute carrier family 4, sodium borate transporter, member 11	20p12,	83959,		Slc4a11,	Congenital hereditary endothelial dystrophy 2,Corneal dystrophy and perceptive deafness 1,Corneal endothelial dystrophy 2,Corneal endothelial dystrophy and perceptive deafness,
223044_at	solute carrier family 40 (iron-regulated transporter), member 1	2q32,	30061,		SLC40A1,	Hemochromatosis, type 4,
227620_at, 228486_at, 224596_at	solute carrier family 44, member 1	9q31.2,	23446,		slc44a1,
224609_at, 225175_s_at	solute carrier family 44, member 2	19p13.1,	57153,		SLC44A2,
228221_at	solute carrier family 44, member 3	1p21.3,	126969,		SLC44A3,
205597_at	solute carrier family 44, member 4	6p21.3,	80736,		SLC44A4,
1552782_at, 1569112_at, 235763_at	solute carrier family 44, member 5	1p31.1,	204962,		SLC44A5,
219525_at	solute carrier family 47, member 1	17p11.2,	55244,		SLC47A1,
237058_x_at	solute carrier family 6 (neurotransmitter transporter, GABA), member 13	12p13.3,	6540,		SLC6A13,
1569940_at, 219820_at	solute carrier family 6, member 16	19q13.1-q13.4,	28968,		Slc6a16,
209921_at, 217678_at	solute carrier family 7, (cationic amino acid transporter, y+ system) member 11	4q28-q32,	23657,		SLC7A11,
226125_at	solute carrier family 9 (sodium/hydrogen exchanger), member 3	5p15.3,	6550,		SLC9A3,
217164_at	solute carrier organic anion transporter family, member 4A1	20q13.33,	28231,		SLCO4A1,
232883_at, 229261_at, 230337_at, 227426_at	son of sevenless homolog 1 (Drosophila)	2p22-p21,	6654,	hsa04010:MAPK signaling pathway,hsa04012:ErbB signaling pathway,hsa04062:Chemokine signaling pathway,hsa04320:Dorso-ventral axis formation,hsa04510:Focal adhesion,hsa04540:Gap junction,hsa04630:Jak-STAT signaling pathway,hsa04650:Natural killer cell mediated cytotoxicity,hsa04660:T cell receptor signaling pathway,hsa04662:B cell receptor signaling pathway,hsa04664:Fc epsilon RI signaling pathway,…	SOS1,	Fibromatosis, gingival,Noonan syndrome 4,Noonan-like/multiple giant cell lesion syndrome,
212870_at, 211665_s_at, 217644_s_at	son of sevenless homolog 2 (Drosophila)	14q21,	6655,	hsa04010:MAPK signaling pathway,hsa04012:ErbB signaling pathway,hsa04062:Chemokine signaling pathway,hsa04320:Dorso-ventral axis formation,hsa04510:Focal adhesion,hsa04540:Gap junction,hsa04630:Jak-STAT signaling pathway,hsa04650:Natural killer cell mediated cytotoxicity,hsa04660:T cell receptor signaling pathway,hsa04662:B cell receptor signaling pathway,hsa04664:Fc epsilon RI signaling pathway,…	SOS2,
212807_s_at, 212797_at, 224818_at	sortilin 1	1p21.3-p13.1,1p21.3-p13.1|1p21.3-p13.1,	6272,	hsa04142:Lysosome,hsa04722:Neurotrophin signaling pathway,	Sort1,	Common variants at 30 loci contribute to polygenic dyslipidemia,Genome-wide association analysis of metabolic traits in a birth cohort from a founder population,Newly identified loci that influence lipid concentrations and risk of coronary artery disease,Six new loci associated with blood low-density lipoprotein cholesterol, high-density lipoprotein cholesterol or triglycerides in humans,
213364_s_at	sorting nexin 1	15q22.31,	6642,		SNX1,
202113_s_at, 202114_at	sorting nexin 2	5q23,	6643,		snx2,
225624_at	sorting nexin 29	16p13.13-p13.12,	92017,		Snx29,
229898_at	sorting nexin 33	15q24.2,	257364,		SNX33,
221006_s_at	sorting nexin family member 27	1q21.3,	81609,		SNX27,
226249_at	sorting nexin family member 30	9q32,	401548,		Snx30,
203513_at	spastic paraplegia 11 (autosomal recessive)	15q14,	80208,		SPG11,	Spastic paraplegia-11,
209447_at	spectrin repeat containing, nuclear envelope 1	6q25,	23345,		SYNE1,	Framingham Heart Study 100K Project: genome-wide associations for blood pressure and arterial stiffness,Spinocerebellar ataxia, autosomal recessive 8,
202761_s_at	spectrin repeat containing, nuclear envelope 2	14q23.2,	23224,		SYNE2,
229513_at	spermatid perinuclear RNA binding protein	9q33.3,	55342,		STRBP,
230763_at	spermatogenesis associated 17	1q41,	128153,		SPATA17,
218164_at	spermatogenesis associated 20	17q21.33,	64847,		SPATA20,
242086_at	spermatogenesis associated 6	1p33,	54558,		spata6,
219583_s_at, 234929_s_at	spermatogenesis associated 7	14q31.3,	55812,		SPATA7,	Leber congenital amaurosis 3,Retinitis pigmentosa, juvenile, autosomal recessive,
244187_at	spermidine/spermine N1-acetyl transferase-like 1	Xq21.1,	340562,		SATL1,
203455_s_at, 213988_s_at, 210592_s_at	spermidine/spermine N1-acetyltransferase 1	Xp22.1,	6303,	hsa00330:Arginine and proline metabolism,	Sat1,	Keratosis follicularis spinulosa decalvans,
225272_at	spermidine/spermine N1-acetyltransferase family member 2	17p13.1,	112483,	hsa00330:Arginine and proline metabolism,	SAT2,
213624_at	sphingomyelin phosphodiesterase, acid-like 3A	6q22.31,	10924,		smpdl3a,
222431_at	spindlin 1	9q22.1-q22.3,	10927,		spin1,	Many sequence variants affecting diversity of adult human height,
1555882_at, 1554099_a_at, 1555883_s_at	spindlin family, member 3	Xp11.1,	169981,		Spin3,
227706_at, 1569723_a_at, 243594_x_at	spire homolog 2 (Drosophila)	16q24,	84501,	hsa04320:Dorso-ventral axis formation,	SPIRE2,
46256_at, 221769_at	splA/ryanodine receptor domain and SOCS box containing 3	16p13.3,	90864,		Spsb3,
237746_at, 236948_x_at, 213742_at	splicing factor, arginine/serine-rich 11	1p31,	9295,		SFRS11,
238781_at	splicing factor, arginine/serine-rich 12	5q12.3,	140890,		SFRS12,
226412_at, 212177_at	splicing factor, arginine/serine-rich 18	6q16.3,	25957,		sfrs18,
1570507_at	splicing factor, arginine/serine-rich 2, interacting protein	12q12-q13.11,	9169,		SFRS2IP,
204362_at	src kinase associated phosphoprotein 2	7p21-p15,	8935,		skap2,
218032_at	stannin	16p13,	8303,		SNN,
203438_at	stanniocalcin 2	5q35.2,	8614,		STC2,
227179_at	staufen, RNA binding protein, homolog 2 (Drosophila)	8q13-q21.1,	27067,		STAU2,
223839_s_at	stearoyl-CoA desaturase (delta-9-desaturase)	10q24.31,	6319,	hsa01040:Biosynthesis of unsaturated fatty acids,hsa03320:PPAR signaling pathway,	scd,
238673_at	sterile alpha motif domain containing 12	8q24.12,	401474,		SAMD12,
229402_at	sterile alpha motif domain containing 13	1p31.1,	148418,		Samd13,
219691_at, 228531_at	sterile alpha motif domain containing 9	7q21.2,	54809,		SAMD9,	Tumoral calcinosis, familial, normophosphatemic,
230036_at, 226603_at	sterile alpha motif domain containing 9-like	7q21.2-q21.3,	219285,		SAMD9L,
210959_s_at	steroid-5-alpha-reductase, alpha polypeptide 1 (3-oxo-5 alpha-steroid delta 4-dehydrogenase alpha 1)	5p15,	6715,	hsa00140:Steroid hormone biosynthesis,hsa00150:Androgen and estrogen metabolism,	srd5a1,
202308_at	sterol regulatory element binding transcription factor 1	17p11.2,	6720,	hsa04910:Insulin signaling pathway,	Srebf1,
243543_at, 209146_at	sterol-C4-methyl oxidase-like	4q32-q34,	6307,	hsa00100:Steroid biosynthesis,	SC4MOL,
215064_at	sterol-C5-desaturase (ERG3 delta-5-desaturase homolog, S. cerevisiae)-like	11q23.3,	6309,	hsa00100:Steroid biosynthesis,	SC5DL,	Lathosterolosis,
213413_at	stonin 1; STON1-GTF2A1L readthrough transcript; general transcription factor IIA, 1-like	2p16.3,	11036,11037,286749,	hsa03022:Basal transcription factors,	gtf2a1l,STON1,STON1-GTF2A1L,
226850_at	sulfatase modifying factor 1	3p26.2,	285362,		sumf1,	Multiple sulfatase deficiency,
204067_at	sulfite oxidase	12q13.2,	6821,	hsa00920:Sulfur metabolism,	SUOX,	A novel susceptibility locus for type 1 diabetes on Chr12q13 identified by a genome-wide association study,Sulfite oxidase deficiency,
203615_x_at, 215299_x_at	sulfotransferase family, cytosolic, 1A, phenol-preferring, member 1	16p12.1,	6817,	hsa00920:Sulfur metabolism,	sult1a1,
1566342_at	superoxide dismutase 2, mitochondrial	6q25.3,	6648,	hsa05016:Huntington's disease,	Sod2,
203373_at, 203372_s_at	suppressor of cytokine signaling 2	12q,	8835,	hsa04630:Jak-STAT signaling pathway,hsa04910:Insulin signaling pathway,hsa04930:Type II diabetes mellitus,	socs2,	Genome-wide association analysis identifies 20 loci that influence adult height,Many sequence variants affecting diversity of adult human height,
227274_at	synaptojanin 2 binding protein	14q24.2,	55333,		synj2bp,
237304_at	synaptonemal complex central element protein 2	19p13.13,	256126,		Syce2,
229773_at, 209131_s_at	synaptosomal-associated protein, 23kDa	15q15.1,	8773,	hsa04130:SNARE interactions in vesicular transport,	snap23,
1556629_a_at	synaptosomal-associated protein, 25kDa	20p12-p11.2,	6616,	hsa04130:SNARE interactions in vesicular transport,	SNAP25,
239084_at	synaptosomal-associated protein, 29kDa	22q11.21,	9342,	hsa04130:SNARE interactions in vesicular transport,	Snap29,	Cerebral dysgenesis, neuropathy, ichthyosis, and palmoplantar keratoderma syndrome,
204953_at	synaptosomal-associated protein, 91kDa homolog (mouse)	6q14.2,	9892,		SNAP91,
203999_at	synaptotagmin I	12cen-q21,	6857,		Syt1,
229053_at, 205613_at	synaptotagmin XVII; synaptotagmin VII	11q12-q13.1,16p12.3,	51760,9066,		syt17,Syt7,
227134_at	synaptotagmin-like 1	1p36.11,	84958,		SYTL1,
225496_s_at, 232914_s_at	synaptotagmin-like 2	11q14,	54843,		SYTL2,
1563513_at, 227703_s_at, 229991_s_at	synaptotagmin-like 4	Xq21.33,	94121,		SYTL4,
242093_at	synaptotagmin-like 5	Xp21.1,	94122,		SYTL5,
235483_at, 216985_s_at	syntaxin 3	11q12.1,	6809,	hsa04130:SNARE interactions in vesicular transport,	STX3,
1565567_at, 212632_at, 212631_at, 1565566_a_at	syntaxin 7	6q23.1,	8417,	hsa04130:SNARE interactions in vesicular transport,	STX7,
204690_at	syntaxin 8	17p12,	9482,	hsa04130:SNARE interactions in vesicular transport,	Stx8,
1565525_a_at	t-complex 11 (mouse)-like 2	12q23.3,	255394,		TCP11L2,
202561_at	tankyrase, TRF1-interacting ankyrin-related ADP-ribose polymerase	8p23.1,	8658,		tnks,
221397_at	taste receptor, type 2, member 10	12p13,	50839,	hsa04742:Taste transduction,	TAS2R10,
213922_at, 1557073_s_at, 226964_at	tau tubulin kinase 2	15q15.2,	146057,		TTBK2,	Spinocerebellar ataxia-11,
223282_at, 223283_s_at	teashirt zinc finger homeobox 1	18q22.3,	10194,		TSHZ1,
217853_at	tensin 3	7p12.3,	64759,		TNS3,
212494_at	tensin like C1 domain containing phosphatase (tensin 2)	12q13.13,	23371,		TENC1,
213411_at, 223838_at	testis specific, 10	2q11.2,	80705,		Tsga10,
205486_at	testis-specific kinase 2	1p32,	10420,		TESK2,
228451_at	testis-specific serine kinase 3	1p35-p34,	81629,		TSSK3,
219274_at	tetraspanin 12	7q31.31,	23554,		TSPAN12,
203227_s_at, 203226_s_at	tetraspanin 31	12q13.3,	6302,		Tspan31,
232323_s_at	tetratricopeptide repeat domain 17	11p12-p11.2,	55761,		ttc17,
229388_at, 229170_s_at, 229169_at	tetratricopeptide repeat domain 18	10q22.2,	118491,		TTC18,
230997_at	tetratricopeptide repeat domain 21A	3p22.2,	199223,		ttc21a,
219838_at	tetratricopeptide repeat domain 23	15q26.3,	64927,		TTC23,
213679_at	tetratricopeptide repeat domain 30A	2q31.2,	92104,		TTC30A,
1554588_a_at, 243413_at	tetratricopeptide repeat domain 30B	2q31.2,	150737,		TTC30B,
226838_at	tetratricopeptide repeat domain 32	2p24.1,	130502,		TTC32,
219421_at	tetratricopeptide repeat domain 33	5p15.2-p12,	23548,		TTC33,
233995_at	tetratricopeptide repeat domain 37	5q15,	9652,	hsa03018:RNA degradation,	TTC37,
232000_at	tetratricopeptide repeat domain 39B	9p22.3,	158219,		Ttc39b,	Common variants at 30 loci contribute to polygenic dyslipidemia,
226120_at	tetratricopeptide repeat domain 8	14q31.3,	123016,		TTC8,	Bardet-Biedl syndrome 8,
1569189_at	tetratricopeptide repeat domain 9C	11q12.3,	283237,		TTC9C,
216609_at	thioredoxin	9q31,	7295,		TXN,
226747_at	thioredoxin domain containing 16	14q22.1,	57544,		Txndc16,
220384_at	thioredoxin domain containing 3 (spermatozoa)	7p14.1,	51314,		TXNDC3,	Ciliary dyskinesia, primary, 6,
201008_s_at, 201010_s_at, 201009_s_at	thioredoxin interacting protein	1q21.1,	10628,		TXNIP,
209605_at	thiosulfate sulfurtransferase (rhodanese)	22q13.1,	7263,		TST,
209561_at	thrombospondin 3	1q21,	7059,	hsa04350:TGF-beta signaling pathway,hsa04510:Focal adhesion,hsa04512:ECM-receptor interaction,	Thbs3,
243016_at	thymidylate synthetase	18p11.32,	7298,	hsa00240:Pyrimidine metabolism,hsa00670:One carbon pool by folate,	Tyms,
218491_s_at	thymocyte nuclear protein 1	11q25,	29087,		THYN1,
205347_s_at	thymosin beta 15a; thymosin beta 15B	Xq21.33-q22.3,Xq22.2,	11013,286527,		Tmsb15a,TMSB15B,
202085_at, 232017_at	tight junction protein 2 (zona occludens 2)	9q13-q21,	9414,	hsa04530:Tight junction,hsa05110:Vibrio cholerae infection,	TJP2,	Hypercholanemia, familial,
[truncated: 252 more rows]
