# Supplementary material for: Differential Transcriptional Effects of EGFR Inhibitors
Source: PLoS One. 2014 Sep 3;9(9):e102466. doi: 10.1371/journal.pone.0102466 (PMC4153546; doi:10.1371/journal.pone.0102466)
Supplement: Table S3 — Ontological categories. Top 100 ontological categories, by p-values, are listed for each list of genes mentioned in the text. (XLSX) [file pone.0102466.s003.xlsx]

## Sheet: AllDN_Chart
All - Down						All - Up						Kinase inhibitors - Down						Kinase inhibitors - Up						Gefitinib Down						Gefitinib Up						Not Gef. Down						Not Gef. Up						Erlotinib Down
Term	Count	%	PValue	Bonferroni		Term	Count	%	PValue	Bonferroni		Term	Count	%	PValue	Bonferroni		Term	Count	%	PValue	Bonferroni		Term	Count	%	PValue	Bonferroni		Term	Count	%	PValue	Bonferroni		Term	Count	%	PValue	Bonferroni		Term	Count	%	PValue	Bonferroni		Term	Count
Epithelium	642	25.2756	1.8884e-65	7.19481e-63		vacuole	61	2.69912	8.20316e-10	4.65119e-07		membrane-enclosed lumen	487	20.0908	3.24693e-60	2.08453e-57		Placenta	464	20.8539	1.71646e-08	6.33373e-06		Epithelium	357	25.0526	1.15839e-34	3.64893e-32		GO:0046914~transition metal ion binding	296	18.3509	8.12584e-08	8.64552e-05		GO:0031974~membrane-enclosed lumen	430	22.0513	1.39752e-53	9.18168e-51		GO:0005773~vacuole	51	4.02208	1.59963e-13	7.6312e-11		GO:0022613~ribonucleoprotein complex biogenesis	29
membrane-enclosed lumen	515	20.2756	3.05632e-64	2.00495e-61		lysosome	50	2.21239	6.76606e-08	3.83629e-05		Epithelium	603	24.8762	7.85445e-59	2.89044e-56		Epithelium	373	16.764	5.26176e-08	1.94157e-05		GO:0031974~membrane-enclosed lumen	281	19.7193	2.26487e-34	1.18906e-31		GO:0010629~negative regulation of gene expression	74	4.58772	2.85365e-07	0.000968345		GO:0070013~intracellular organelle lumen	416	21.3333	1.06567e-52	7.00142e-50		Placenta	298	23.5016	1.44624e-09	4.4978e-07		GO:0042254~ribosome biogenesis	24
intracellular organelle lumen	498	19.6063	4.10331e-63	2.69177e-60		lytic vacuole	50	2.21239	6.76606e-08	3.83629e-05		organelle lumen	477	19.6782	1.37635e-58	8.83617e-56		GO:0005773~vacuole	55	2.47191	9.61782e-08	5.39545e-05		GO:0070013~intracellular organelle lumen	272	19.0877	7.42319e-34	3.89718e-31		GO:0008270~zinc ion binding	249	15.4371	4.55274e-07	0.000484295		GO:0043233~organelle lumen	419	21.4872	3.57163e-51	2.34656e-48		GO:0000323~lytic vacuole	38	2.99685	8.63765e-09	4.12015e-06		GO:0031974~membrane-enclosed lumen	111
organelle lumen	505	19.8819	9.14448e-63	5.99878e-60		Placenta	465	20.5752	3.06474e-07	0.000114308		intracellular organelle lumen	469	19.3482	2.80177e-58	1.79874e-55		hsa00280:Valine, leucine and isoleucine degradation	18	0.808989	2.11598e-06	0.00039138		GO:0043233~organelle lumen	276	19.3684	8.65172e-34	4.54215e-31		GO:0045449~regulation of transcription	267	16.553	1.59143e-06	0.00538833		GO:0030529~ribonucleoprotein complex	183	9.38462	1.34963e-47	8.86707e-45		GO:0005764~lysosome	38	2.99685	8.63765e-09	4.12015e-06		GO:0043233~organelle lumen	107
nuclear lumen	416	16.378	1.78362e-54	1.17005e-51		response to extracellular stimulus	51	2.25664	6.26407e-07	0.00243063		nuclear lumen	392	16.1716	1.97834e-50	1.27009e-47		GO:0006355~regulation of transcription, DNA-dependent	250	11.236	2.79719e-06	0.0106616		GO:0031981~nuclear lumen	237	16.6316	1.63952e-33	8.60749e-31		GO:0006355~regulation of transcription, DNA-dependent	193	11.9653	1.91866e-06	0.00649269		Epithelium	487	24.9744	1.32184e-45	4.50747e-43		Lung	234	18.4543	4.58529e-08	1.42602e-05		GO:0070013~intracellular organelle lumen	105
nucleolus	226	8.89764	5.47336e-37	3.59053e-34		Valine, leucine and isoleucine degradation	19	0.840708	6.9847e-07	0.000129209		nucleolus	216	8.91089	8.44828e-36	5.4238e-33		Testis	560	25.1685	2.87611e-06	0.00106072		GO:0005730~nucleolus	142	9.96491	5.28633e-29	2.77532e-26		GO:0003677~DNA binding	247	15.3131	2.11431e-06	0.0022471		GO:0031981~nuclear lumen	331	16.9744	2.73154e-38	1.79462e-35		GO:0008104~protein localization	97	7.64984	1.42584e-07	0.00045146		GO:0031981~nuclear lumen	91
intracellular non-membrane-bounded organelle	554	21.811	1.12508e-30	7.38052e-28		response to nutrient levels	47	2.07965	7.80032e-07	0.00302584		RNA binding	214	8.82838	1.68482e-31	2.50364e-28		GO:0046914~transition metal ion binding	380	17.0787	2.99826e-06	0.00385134		GO:0003723~RNA binding	129	9.05263	7.52959e-19	7.9136e-16		GO:0045892~negative regulation of transcription, DNA-dependent	55	3.4098	2.55026e-06	0.00862076		GO:0003723~RNA binding	199	10.2051	3.09736e-36	4.1133e-33		GO:0045184~establishment of protein localization	85	6.70347	7.87005e-07	0.00248934		Cajal-Retzius cell	26
non-membrane-bounded organelle	554	21.811	1.12508e-30	7.38052e-28		cytosol	193	8.53982	1.62353e-06	0.000920118		non-membrane-bounded organelle	524	21.6172	6.60916e-29	4.24308e-26		GO:0000323~lytic vacuole	45	2.02247	3.14085e-06	0.00176047		GO:0043232~intracellular non-membrane-bounded organelle	300	21.0526	1.73624e-16	1.16573e-13		GO:0043169~cation binding	407	25.2325	2.78504e-06	0.00295891		GO:0006412~translation	124	6.35897	8.72723e-35	3.44115e-31		GO:0015031~protein transport	84	6.62461	1.0076e-06	0.00318598		Skin	91
RNA binding	219	8.62205	2.02193e-30	3.07535e-27		transition metal ion binding	392	17.3451	2.02914e-06	0.0026506		intracellular non-membrane-bounded organelle	524	21.6172	6.60916e-29	4.24308e-26		GO:0005764~lysosome	45	2.02247	3.14085e-06	0.00176047		GO:0043228~non-membrane-bounded organelle	300	21.0526	1.73624e-16	1.16573e-13		GO:0016481~negative regulation of transcription	66	4.09175	2.83592e-06	0.00958175		Cajal-Retzius cell	85	4.35897	3.22871e-33	1.10099e-30		Colon	119	9.38486	1.17993e-06	0.000366891		Epithelium	116
Placenta	642	25.2756	9.19332e-28	3.50266e-25		regulation of transcription, DNA-dependent	258	11.4159	2.28212e-06	0.00882685		RNA processing	172	7.09571	5.86331e-27	2.52357e-23		GO:0009725~response to hormone stimulus	69	3.10112	5.284e-06	0.0200447		Placenta	363	25.4737	1.83537e-16	6.99441e-14		GO:0015630~microtubule cytoskeleton	71	4.40174	2.88028e-06	0.0014995		GO:0043232~intracellular non-membrane-bounded organelle	483	24.7692	1.52563e-32	1.00234e-29		GO:0009719~response to endogenous stimulus	51	4.02208	5.58825e-06	0.0175423		Fetal brain cortex	24
Skin	396	15.5906	4.08763e-27	1.55739e-24		negative regulation of cell proliferation	71	3.14159	2.44222e-06	0.00944317		Placenta	613	25.2888	6.25358e-27	2.30132e-24		GO:0009719~response to endogenous stimulus	74	3.32584	6.68053e-06	0.025275		GO:0006396~RNA processing	104	7.29825	2.56972e-16	7.89813e-13		GO:0043167~ion binding	412	25.5425	2.99647e-06	0.00318318		GO:0043228~non-membrane-bounded organelle	483	24.7692	1.52563e-32	1.00234e-29		GO:0008289~lipid binding	55	4.33754	7.15592e-06	0.00710198		GO:0005730~nucleolus	51
RNA processing	176	6.92913	3.70538e-26	1.63741e-22		response to hormone stimulus	71	3.14159	4.45173e-06	0.0171463		ribonucleoprotein complex	155	6.39439	3.33554e-24	2.14142e-21		GO:0051252~regulation of RNA metabolic process	252	11.3258	7.58821e-06	0.0286594		GO:0042254~ribosome biogenesis	42	2.94737	7.75911e-16	2.76434e-12		GO:0043232~intracellular non-membrane-bounded organelle	246	15.2511	3.39868e-06	0.00176915		Fetal brain cortex	88	4.51282	5.47982e-32	1.86862e-29		GO:0009725~response to hormone stimulus	47	3.70662	8.89662e-06	0.0277825		GO:0006260~DNA replication	21
Cajal-Retzius cell	84	3.30709	1.64824e-24	6.27981e-22		response to endogenous stimulus	76	3.36283	6.25394e-06	0.0240038		Skin	370	15.264	9.37763e-24	3.45097e-21		GO:0045449~regulation of transcription	345	15.5056	7.87207e-06	0.0297154		GO:0022613~ribonucleoprotein complex biogenesis	50	3.50877	1.60864e-14	5.72614e-11		GO:0043228~non-membrane-bounded organelle	246	15.2511	3.39868e-06	0.00176915		Skin	336	17.2308	3.52377e-30	1.20161e-27		GO:0019899~enzyme binding	61	4.81073	9.31471e-06	0.00923459		GO:0006364~rRNA processing	14
ribonucleoprotein complex biogenesis	84	3.30709	2.13847e-24	9.4499e-21		regulation of RNA metabolic process	260	11.5044	6.56382e-06	0.0251781		ribonucleoprotein complex biogenesis	80	3.30033	4.50931e-23	1.94081e-19		Uterus	247	11.1011	7.94322e-06	0.00292677		GO:0034470~ncRNA processing	49	3.4386	3.35084e-13	1.19183e-09		GO:0046872~metal ion binding	403	24.9845	3.43732e-06	0.00365064		GO:0003735~structural constituent of ribosome	77	3.94872	2.70438e-29	3.59141e-26		GO:0048545~response to steroid hormone stimulus	30	2.36593	1.32696e-05	0.0411542		GO:0016072~rRNA metabolic process	14
ribonucleoprotein complex	160	6.29921	5.94396e-24	3.89923e-21		response to nutrient	35	1.54867	8.48648e-06	0.0324325		Cajal-Retzius cell	79	3.25908	1.82562e-22	6.7183e-20		GO:0010629~negative regulation of gene expression	87	3.91011	9.75729e-06	0.0366998		GO:0034660~ncRNA metabolic process	54	3.78947	2.04069e-12	7.25877e-09		hsa00280:Valine, leucine and isoleucine degradation	15	0.929944	3.56226e-06	0.000623202		GO:0005840~ribosome	88	4.51282	7.43147e-28	4.88248e-25		IPR007125:Histone core	13	1.02524	2.00141e-05	0.0297889		Cervix carcinoma	27
nucleoplasm	233	9.17323	8.35379e-24	5.48009e-21		Epithelium	365	16.1504	8.59127e-06	0.00319943		nucleoplasm	217	8.95215	3.59753e-21	2.30962e-18		GO:0005829~cytosol	184	8.26966	9.89347e-06	0.00553489		GO:0005654~nucleoplasm	122	8.5614	2.8485e-11	1.49546e-08		GO:0051253~negative regulation of RNA metabolic process	55	3.4098	4.24355e-06	0.0143036		Placenta	519	26.6154	5.24689e-27	1.78919e-24		GO:0005626~insoluble fraction	83	6.54574	2.6569e-05	0.0125936		GO:0019220~regulation of phosphate metabolic process	34
ribosome biogenesis	64	2.51969	4.24002e-22	1.87367e-18		zinc ion binding	328	14.5133	9.27531e-06	0.0120589		ribosome biogenesis	61	2.5165	6.75574e-21	2.90767e-17		GO:0042579~microbody	27	1.21348	1.00321e-05	0.00561221		MF00042:Nucleic acid binding	270	18.9474	1.2447e-10	2.60142e-08		Epithelium	269	16.677	4.29377e-06	0.00135591		GO:0006396~RNA processing	153	7.84615	1.29693e-26	5.11379e-23		GO:0000267~cell fraction	101	7.9653	3.41969e-05	0.0161799		GO:0051174~regulation of phosphorus metabolic process	34
cell cycle	213	8.38583	1.10842e-21	4.89812e-18		Brain	994	43.9823	1.15011e-05	0.00428076		Fetal brain cortex	79	3.25908	1.63538e-19	6.01821e-17		GO:0005777~peroxisome	27	1.21348	1.00321e-05	0.00561221		MF00039:Other transcription factor	63	4.42105	2.16546e-10	4.52582e-08		GO:0051252~regulation of RNA metabolic process	194	12.0273	5.50188e-06	0.0185056		GO:0005829~cytosol	279	14.3077	1.9058e-25	1.25211e-22		hsa04142:Lysosome	22	1.73502	4.19645e-05	0.00756697		GO:0034470~ncRNA processing	19
cytosol	308	12.126	1.74456e-21	1.14443e-18		cell fraction	158	6.99115	1.29896e-05	0.00733808		ncRNA metabolic process	87	3.58911	1.74891e-19	7.52731e-16		GO:0015630~microtubule cytoskeleton	89	4	1.13589e-05	0.00635211		Cervix carcinoma	64	4.49123	2.55569e-10	8.05041e-08		GO:0016564~transcription repressor activity	50	3.09981	7.24044e-06	0.00767426		MF00042:Nucleic acid binding	406	20.8205	2.75229e-24	6.19265e-22		11q13	14	1.1041	4.37948e-05	0.0310834		GO:0006259~DNA metabolic process	34
Fetal brain cortex	83	3.26772	1.20606e-20	4.59511e-18		peroxisome	27	1.19469	1.69306e-05	0.00955378		cytosol	288	11.8812	2.83976e-19	1.82313e-16		GO:0008285~negative regulation of cell proliferation	67	3.01124	1.13858e-05	0.0426926		Skin	201	14.1053	9.39772e-10	2.96028e-07		GO:0000785~chromatin	34	2.10787	8.01402e-06	0.00416662		GO:0005654~nucleoplasm	201	10.3077	1.73756e-22	1.14158e-19		GO:0031667~response to nutrient levels	29	2.28707	5.71784e-05	0.165639		GO:0042325~regulation of phosphorylation	32
cell cycle process	167	6.5748	1.56352e-20	6.90921e-17		microbody	27	1.19469	1.69306e-05	0.00955378		ncRNA processing	73	3.01155	2.44292e-17	1.05143e-13		GO:0008270~zinc ion binding	318	14.2921	1.29581e-05	0.0165389		GO:0016072~rRNA metabolic process	29	2.03509	1.26653e-09	4.50503e-06		GO:0010558~negative regulation of macromolecule biosynthetic process	72	4.46373	2.16017e-05	0.0707137		GO:0000278~mitotic cell cycle	111	5.69231	5.41575e-22	2.13543e-18		GO:0008285~negative regulation of cell proliferation	44	3.47003	5.88386e-05	0.170015		GO:0003723~RNA binding	42
mitotic cell cycle	123	4.84252	1.00286e-19	4.43162e-16		Testis	565	25	2.03603e-05	0.00756569		cell cycle	192	7.92079	6.34029e-17	4.7784e-13		GO:0000267~cell fraction	154	6.92135	1.40906e-05	0.00787371		GO:0008134~transcription factor binding	82	5.75439	1.95377e-09	2.05341e-06		GO:0051172~negative regulation of nitrogen compound metabolic process	69	4.27774	2.37889e-05	0.077589		GO:0033279~ribosomal subunit	59	3.02564	6.67631e-22	4.38634e-19		GO:0005624~membrane fraction	79	6.23028	6.69701e-05	0.0314409		GO:0030529~ribonucleoprotein complex	35
ncRNA metabolic process	89	3.50394	3.68493e-19	1.62837e-15		regulation of transcription	352	15.5752	2.36305e-05	0.0877174		rRNA processing	46	1.89769	7.573e-16	3.34488e-12		GO:0009991~response to extracellular stimulus	46	2.06742	1.67656e-05	0.0622259		GO:0006364~rRNA processing	28	1.96491	2.14571e-09	7.63226e-06		GO:0031327~negative regulation of cellular biosynthetic process	73	4.52573	2.76028e-05	0.0894558		GO:0007049~cell cycle	181	9.28205	1.53972e-21	6.07111e-18		IPR000169:Peptidase, cysteine peptidase active site	11	0.867508	6.71646e-05	0.096509		B-cell lymphoma	14
Lung	484	19.0551	3.71794e-18	1.41653e-15		Golgi apparatus	130	5.75221	3.18322e-05	0.0178872		rRNA metabolic process	47	1.93894	1.05858e-15	4.7784e-12		GO:0031667~response to nutrient levels	42	1.88764	2.56463e-05	0.0936028		GO:0051173~positive regulation of nitrogen compound metabolic process	97	6.80702	2.79271e-09	9.9336e-06		GO:0045934~negative regulation of nucleobase, nucleoside, nucleotide and nucleic acid metabolic process	68	4.21575	2.83305e-05	0.0917027		B-cell lymphoma	55	2.82051	2.16814e-21	7.39334e-19		GO:0005768~endosome	39	3.07571	6.90498e-05	0.0324013		Lung	100
B-cell lymphoma	56	2.20472	4.98205e-17	1.89816e-14		membrane fraction	122	5.39823	3.43817e-05	0.019306		cell cycle process	148	6.10561	4.09042e-15	1.76801e-11		GO:0010558~negative regulation of macromolecule biosynthetic process	91	4.08989	2.61835e-05	0.0954669		IPR004827:Basic-leucine zipper (bZIP) transcription factor	20	1.40351	6.18993e-09	1.10242e-05		IPR007125:Histone core	14	0.867948	2.97316e-05	0.0507007		GO:0006259~DNA metabolic process	132	6.76923	4.23797e-20	1.67103e-16		GO:0034613~cellular protein localization	48	3.78549	7.37624e-05	0.208333		IPR018525:DNA-dependent ATPase MCM, conserved site	5
ncRNA processing	74	2.91339	1.09807e-16	4.90608e-13		ion binding	557	24.646	4.0445e-05	0.0515281		translation	101	4.16667	5.75759e-15	2.48477e-11		GO:0043228~non-membrane-bounded organelle	324	14.5618	2.69282e-05	0.0149934		GO:0006351~transcription, DNA-dependent	55	3.85965	7.42973e-09	2.64272e-05		GO:0034728~nucleosome organization	21	1.30192	3.1981e-05	0.102891		BP00061:Protein biosynthesis	111	5.69231	4.84406e-20	1.03663e-17		GO:0010941~regulation of cell death	81	6.38801	7.38392e-05	0.208525		Placenta	122
rRNA processing	48	1.88976	1.3154e-16	4.90608e-13		cation binding	549	24.292	4.51702e-05	0.0573724		Lung	450	18.5644	1.04973e-14	3.88134e-12		GO:0043232~intracellular non-membrane-bounded organelle	324	14.5618	2.69282e-05	0.0149934		GO:0032774~RNA biosynthetic process	55	3.85965	1.20664e-08	4.29192e-05		BP00031:Nucleoside, nucleotide and nucleic acid metabolism	286	17.7309	3.40134e-05	0.00715126		GO:0031975~envelope	151	7.74359	1.40237e-19	9.21354e-17		GO:0042981~regulation of apoptosis	80	6.30915	7.7885e-05	0.218603		hsa04110:Cell cycle	16
rRNA metabolic process	49	1.92913	1.89957e-16	9.81215e-13		Lung	354	15.6637	4.74788e-05	0.0175541		mitotic cell cycle	108	4.45545	1.67964e-14	7.21538e-11		GO:0016481~negative regulation of transcription	79	3.55056	2.92019e-05	0.105869		Lung	262	18.386	1.30063e-08	4.09696e-06		GO:0000786~nucleosome	16	0.99194	3.5471e-05	0.018311		GO:0022613~ribonucleoprotein complex biogenesis	68	3.48718	1.66244e-19	6.55499e-16		GO:0070727~cellular macromolecule localization	48	3.78549	9.16447e-05	0.251925		GO:0034660~ncRNA metabolic process	20
Muscle	192	7.55906	4.35204e-16	1.69198e-13		Lysosome	30	1.32743	5.03851e-05	0.00927818		B-cell lymphoma	51	2.10396	2.07125e-14	7.64011e-12		GO:0005794~Golgi apparatus	127	5.70787	3.00133e-05	0.0166967		GO:0031328~positive regulation of cellular biosynthetic process	99	6.94737	1.63925e-08	5.83065e-05		GO:0006350~transcription	214	13.2672	4.32505e-05	0.136567		GO:0031967~organelle envelope	150	7.69231	2.63198e-19	1.72921e-16		GO:0031327~negative regulation of cellular biosynthetic process	60	4.73186	0.000106323	0.285908		IPR001208:DNA-dependent ATPase MCM	5
Nucleic acid binding	461	18.1496	1.39709e-14	3.20344e-12		regulation of cell proliferation	124	5.48673	5.62166e-05	0.196202		Nucleic acid binding	439	18.1106	2.77033e-14	6.30052e-12		GO:0048545~response to steroid hormone stimulus	41	1.8427	3.12559e-05	0.11288		BP00031:Nucleoside, nucleotide and nucleic acid metabolism	311	21.8246	2.90124e-08	5.83148e-06		GO:0044427~chromosomal part	51	3.16181	5.09007e-05	0.0261714		GO:0022402~cell cycle process	140	7.17949	3.84229e-19	1.51501e-15		GO:0043067~regulation of programmed cell death	80	6.30915	0.000108399	0.290587		GO:0006396~RNA processing	34
cell cycle phase	121	4.76378	1.71583e-14	7.60442e-11		microtubule cytoskeleton	88	3.89381	5.91515e-05	0.0329837		Cervix carcinoma	101	4.16667	3.17757e-14	1.16849e-11		GO:0005624~membrane fraction	119	5.34831	3.57418e-05	0.0198518		GO:0009891~positive regulation of biosynthetic process	99	6.94737	3.42001e-08	0.000121642		GO:0006333~chromatin assembly or disassembly	25	1.54991	5.18949e-05	0.161539		GO:0005730~nucleolus	161	8.25641	1.47628e-18	9.69917e-16		GO:0042127~regulation of cell proliferation	78	6.15142	0.00011048	0.295248		GO:0042981~regulation of apoptosis	44
Cervix carcinoma	103	4.05512	1.13984e-13	4.34416e-11		Uterus	246	10.885	6.11556e-05	0.0225535		nucleotide binding	416	17.1617	2.52115e-13	3.74668e-10		GO:0010033~response to organic substance	113	5.07865	3.85316e-05	0.137272		GO:0045935~positive regulation of nucleobase, nucleoside, nucleotide and nucleic acid metabolic process	91	6.38596	4.44473e-08	0.000158087		GO:0009890~negative regulation of biosynthetic process	73	4.52573	5.49837e-05	0.170287		Cervix carcinoma	96	4.92308	5.77632e-18	1.96973e-15		GO:0000786~nucleosome	14	1.1041	0.000111481	0.0517899		GO:0043067~regulation of programmed cell death	44
Cell cycle	56	2.20472	1.45242e-13	2.73008e-11		negative regulation of gene expression	86	3.80531	6.15532e-05	0.212697		Colon carcinoma	61	2.5165	4.52739e-13	1.66612e-10		GO:0031327~negative regulation of cellular biosynthetic process	92	4.13483	4.10597e-05	0.14559		GO:0030529~ribonucleoprotein complex	73	5.12281	1.85311e-07	9.72837e-05		BP00040:mRNA transcription	180	11.1593	6.48233e-05	0.013585		GO:0006414~translational elongation	47	2.41026	7.7615e-18	3.06036e-14		IPR004827:Basic-leucine zipper (bZIP) transcription factor	13	1.02524	0.00011477	0.159222		Kidney	63
nucleotide binding	435	17.126	2.44694e-13	3.72178e-10		cell projection organization	67	2.9646	6.25583e-05	0.215765		Muscle	175	7.21947	6.06781e-13	2.23279e-10		GO:0043167~ion binding	541	24.3146	4.13763e-05	0.0518593		GO:0042127~regulation of cell proliferation	106	7.4386	1.92502e-07	0.000684496		Testis	404	25.0465	6.73152e-05	0.0210477		GO:0042254~ribosome biogenesis	52	2.66667	1.16081e-17	4.57708e-14		GO:0010629~negative regulation of gene expression	55	4.33754	0.000128558	0.334469		GO:0010941~regulation of cell death	44
translation	100	3.93701	4.51096e-13	1.99334e-09		response to inorganic substance	43	1.90265	6.75894e-05	0.230946		Uterus	315	12.995	6.32114e-13	2.32635e-10		GO:0016564~transcription repressor activity	60	2.69663	4.39019e-05	0.0549364		GO:0010604~positive regulation of macromolecule metabolic process	113	7.92982	2.14347e-07	0.000762141		GO:0065004~protein-DNA complex assembly	20	1.23993	7.66262e-05	0.229069		GO:0006260~DNA replication	67	3.4359	1.91812e-17	7.56315e-14		GO:0006869~lipid transport	23	1.81388	0.000132969	0.343701		GO:0034621~cellular macromolecular complex subunit organization	25
cell division	92	3.62205	5.77112e-13	2.55018e-09		insoluble fraction	124	5.48673	7.17131e-05	0.0398471		Cell cycle	52	2.14521	2.85249e-12	5.24859e-10		BP00207:Cell cycle control	68	3.05618	4.44406e-05	0.0097295		GO:0045596~negative regulation of cell differentiation	42	2.94737	2.30657e-07	0.000820109		GO:0006334~nucleosome assembly	19	1.17793	8.23293e-05	0.243853		GO:0016071~mRNA metabolic process	101	5.17949	5.89549e-17	4.37761e-13		GO:0031982~vesicle	67	5.28391	0.000133315	0.0616156		Keratinocyte	13
Uterus	328	12.9134	6.91002e-13	2.63272e-10		Colon	176	7.78761	7.96358e-05	0.0292685		cell cycle phase	110	4.53795	7.60317e-12	3.27239e-08		GO:0043169~cation binding	533	23.9551	5.09009e-05	0.0634114		GO:0012501~programmed cell death	87	6.10526	2.63186e-07	0.000935715		Placenta	321	19.9008	0.000103211	0.0320901		GO:0044429~mitochondrial part	139	7.12821	2.53111e-16	1.45883e-13		BP00281:Oncogenesis	47	3.70662	0.000157082	0.0310826		Lymph	35
regulation of cell cycle	99	3.89764	1.16522e-12	5.14893e-09		extrinsic to membrane	80	3.53982	9.42123e-05	0.052019		Cervix	117	4.82673	1.74319e-11	6.41496e-09		GO:0009890~negative regulation of biosynthetic process	93	4.17978	5.5204e-05	0.190669		Fetal brain cortex	39	2.73684	3.0502e-07	9.60768e-05		GO:0005694~chromosome	57	3.53379	0.000105312	0.0533924		GO:0022403~cell cycle phase	108	5.53846	2.54392e-16	8.75522e-13		GO:0009991~response to extracellular stimulus	30	2.36593	0.000165909	0.408727		GO:0005654~nucleoplasm	48
Colon carcinoma	62	2.44094	1.18285e-12	4.50659e-10		transcription repressor activity	60	2.65487	0.000106307	0.129821		cellular macromolecular complex subunit organization	97	4.00165	3.91695e-11	1.68586e-07		GO:0019898~extrinsic to membrane	79	3.55056	6.00989e-05	0.0331544		GO:0001944~vasculature development	46	3.22807	3.34981e-07	0.00119082		hsa00640:Propanoate metabolism	11	0.681959	0.000108074	0.0187362		GO:0008380~RNA splicing	84	4.30769	3.14126e-16	1.31328e-12		GO:0010558~negative regulation of macromolecule biosynthetic process	58	4.57413	0.000177089	0.429299		GO:0008284~positive regulation of cell proliferation	27
Cervix	124	4.88189	1.91778e-12	7.30682e-10		transcription factor binding	88	3.89381	0.000113401	0.13786		mRNA metabolic process	99	4.08416	6.15453e-11	2.64891e-07		GO:0005856~cytoskeleton	185	8.31461	6.03911e-05	0.0333129		MF00053:Other RNA-binding protein	35	2.45614	3.59811e-07	7.51977e-05		IPR013088:Zinc finger, NHR/GATA-type	14	0.867948	0.000124081	0.195194		GO:0006397~mRNA processing	90	4.61538	8.03397e-16	3.06433e-12		GO:0005776~autophagic vacuole	7	0.55205	0.000177311	0.0811063		GO:0043232~intracellular non-membrane-bounded organelle	110
nuclear envelope	69	2.71654	2.05648e-12	1.34904e-09		Cell cycle control	68	3.00885	0.000122738	0.0267621		nuclear pore	35	1.44389	6.58348e-11	4.22659e-08		hsa04142:Lysosome	29	1.30337	6.51531e-05	0.0119814		GO:0010557~positive regulation of macromolecule biosynthetic process	91	6.38596	3.91058e-07	0.00139003		GO:0000122~negative regulation of transcription from RNA polymerase II promoter	40	2.47985	0.000131084	0.359213		hsa03010:Ribosome	44	2.25641	1.28664e-15	2.34479e-13		GO:0009890~negative regulation of biosynthetic process	60	4.73186	0.000188312	0.449231		GO:0043228~non-membrane-bounded organelle	110
Bone marrow	164	6.45669	5.02291e-12	1.91371e-09		metal ion binding	540	23.8938	0.00012977	0.156125		macromolecular complex assembly	153	6.31188	9.00803e-11	3.87705e-07		Brain	962	43.236	6.57311e-05	0.0239638		GO:0005829~cytosol	149	10.4561	4.02145e-07	0.000211104		GO:0031497~chromatin assembly	19	1.17793	0.000132756	0.362842		GO:0043933~macromolecular complex subunit organization	155	7.94872	1.6739e-15	6.56641e-12		GO:0031410~cytoplasmic vesicle	64	5.04732	0.000211201	0.0958441		GO:0043933~macromolecular complex subunit organization	39
cellular macromolecular complex subunit organization	102	4.01575	1.06791e-11	4.7191e-08		negative regulation of transcription, DNA-dependent	64	2.83186	0.000135225	0.408672		purine nucleotide binding	352	14.5215	1.23024e-10	1.82814e-07		GO:0010035~response to inorganic substance	42	1.88764	6.6897e-05	0.226135		GO:0030528~transcription regulator activity	174	12.2105	4.12374e-07	0.000433311		MF00003:Nuclear hormone receptor	13	0.805952	0.000167554	0.0350625		Muscle	158	8.10256	1.74364e-15	6.05738e-13		IPR001849:Pleckstrin homology	35	2.76025	0.000247883	0.312434		hsa03030:DNA replication	8
nuclear pore	37	1.45669	1.22232e-11	8.01843e-09		cell projection morphogenesis	48	2.12389	0.000139026	0.417341		nuclear envelope	63	2.59901	1.37228e-10	8.81006e-08		GO:0005626~insoluble fraction	121	5.4382	7.41508e-05	0.0407467		GO:0001568~blood vessel development	45	3.15789	4.29962e-07	0.00152821		IPR001628:Zinc finger, nuclear hormone receptor-type	13	0.805952	0.000176992	0.26638		GO:0065003~macromolecular complex assembly	147	7.53846	3.26751e-15	1.26951e-11		GO:0007507~heart development	29	2.28707	0.000261915	0.563773		GO:0005732~small nucleolar ribonucleoprotein complex	6
M phase of mitotic cell cycle	73	2.87402	1.84243e-11	8.14168e-08		negative regulation of macromolecule biosynthetic process	90	3.9823	0.000151286	0.444447		endomembrane system	167	6.88944	1.5025e-10	9.64604e-08		GO:0005739~mitochondrion	150	6.74157	8.67858e-05	0.0475227		GO:0007005~mitochondrion organization	31	2.17544	4.95172e-07	0.00175978		IPR001723:Steroid hormone receptor	13	0.805952	0.000220753	0.320474		MF00075:Ribosomal protein	79	4.05128	6.49776e-15	1.47382e-12		GO:0008219~cell death	71	5.59937	0.000263859	0.566451		GO:0065003~macromolecular complex assembly	37
pore complex	41	1.61417	1.94974e-11	1.27903e-08		Liver	287	12.6991	0.000152738	0.0553828		macromolecular complex subunit organization	160	6.60066	1.67485e-10	7.20857e-07		GO:0051172~negative regulation of nitrogen compound metabolic process	85	3.82022	8.73074e-05	0.284359		GO:0045941~positive regulation of transcription	81	5.68421	5.15374e-07	0.00183151		GO:0006325~chromatin organization	51	3.16181	0.000224976	0.534145		GO:0005739~mitochondrion	211	10.8205	6.55065e-15	4.30356e-12		GO:0006886~intracellular protein transport	43	3.39117	0.000264428	0.567232		MF00042:Nucleic acid binding	97
nuclear division	72	2.83465	2.062e-11	9.112e-08		response to organic substance	113	5	0.000156591	0.45578		regulation of cell cycle	90	3.71287	2.05232e-10	8.8332e-07		GO:0003677~DNA binding	314	14.1124	8.82428e-05	0.107361		GO:0048514~blood vessel morphogenesis	40	2.80702	9.15426e-07	0.00325088		GO:0008285~negative regulation of cell proliferation	49	3.03782	0.000260572	0.587185		GO:0000375~RNA splicing, via transesterification reactions	55	2.82051	9.38283e-15	3.72097e-11		GO:0016481~negative regulation of transcription	50	3.94322	0.0002848	0.59428		BP00048:mRNA splicing	16
mitosis	72	2.83465	2.062e-11	9.112e-08		negative regulation of transcription	78	3.45133	0.000157919	0.458582		purine ribonucleotide binding	338	13.9439	2.2968e-10	3.41305e-07		GO:0045892~negative regulation of transcription, DNA-dependent	63	2.83146	9.20323e-05	0.297201		Colon carcinoma	34	2.38596	1.0254e-06	0.00032295		IPR008946:Nuclear hormone receptor, ligand-binding	13	0.805952	0.000273394	0.38029		GO:0000377~RNA splicing, via transesterification reactions with bulged adenosine as nucleophile	55	2.82051	9.38283e-15	3.72097e-11		GO:0010033~response to organic substance	71	5.59937	0.000288218	0.598649		GO:0016893~endonuclease activity, active with either ribo- or deoxyribonucleic acids and producing 5'-phosphomonoesters	7
Cell cycle	199	7.83465	2.26305e-11	4.91081e-09		response to peptide hormone stimulus	34	1.50442	0.000163019	0.469205		ribonucleotide binding	338	13.9439	2.2968e-10	3.41305e-07		GO:0045934~negative regulation of nucleobase, nucleoside, nucleotide and nucleic acid metabolic process	84	3.77528	9.23851e-05	0.29815		GO:0043566~structure-specific DNA binding	31	2.17544	1.13282e-06	0.00118988		IPR000536:Nuclear hormone receptor, ligand-binding, core	13	0.805952	0.000273394	0.38029		GO:0000398~nuclear mRNA splicing, via spliceosome	55	2.82051	9.38283e-15	3.72097e-11		GO:0000785~chromatin	27	2.12934	0.000292242	0.130137		11q13	8
envelope	148	5.82677	3.43093e-11	2.25069e-08		mitochondrion	152	6.72566	0.000168469	0.0911087		cellular macromolecular complex assembly	87	3.58911	3.03291e-10	1.30536e-06		Lung	343	15.4157	0.000107098	0.0387505		GO:0008284~positive regulation of cell proliferation	63	4.42105	1.6797e-06	0.00595687		MF00036:Transcription factor	183	11.3453	0.00028273	0.0584521		GO:0022626~cytosolic ribosome	38	1.94872	1.50617e-14	9.92006e-12		GO:0016265~death	71	5.59937	0.00032172	0.639062		GO:0034622~cellular macromolecular complex assembly	22
ribonucleotide binding	357	14.0551	4.7633e-11	7.24498e-08		intracellular signaling cascade	181	8.00885	0.000175409	0.494155		pore complex	38	1.56766	3.14422e-10	2.01859e-07		GO:0042127~regulation of cell proliferation	119	5.34831	0.000110922	0.346281		GO:0010628~positive regulation of gene expression	81	5.68421	1.73959e-06	0.00616863		Fetal kidney	30	1.85989	0.000290146	0.0876208		Liver	317	16.2564	1.57698e-14	5.37592e-12		Kidney	130	10.2524	0.000381983	0.112032		GO:0008283~cell proliferation	27
purine ribonucleotide binding	357	14.0551	4.7633e-11	7.24498e-08		Skin fibroblast	11	0.486726	0.000179157	0.0646472		Cell cycle	186	7.67327	3.30185e-10	7.09897e-08		GO:0046872~metal ion binding	525	23.5955	0.000114348	0.136857		GO:0006915~apoptosis	83	5.82456	1.95232e-06	0.00692034		GO:0007049~cell cycle	89	5.51767	0.000338154	0.682801		GO:0000166~nucleotide binding	360	18.4615	1.61797e-14	2.15259e-11		GO:0019902~phosphatase binding	11	0.867508	0.000398474	0.327638		GO:0006268~DNA unwinding during replication	5
organelle envelope	147	5.7874	5.29381e-11	3.47274e-08		death	113	5	0.000182295	0.50751		Protein metabolism and modification	453	18.6881	3.30809e-10	7.11239e-08		GO:0007169~transmembrane receptor protein tyrosine kinase signaling pathway	44	1.97753	0.000120667	0.370245		BP00203:Cell cycle	111	7.78947	2.11554e-06	0.000425134		GO:0051276~chromosome organization	61	3.78177	0.000348941	0.694211		Cervix	108	5.53846	4.80329e-14	1.63928e-11		Thyroid	24	1.89274	0.000401176	0.117318		11p13	6
positive regulation of macromolecule metabolic process	195	7.67717	5.75436e-11	2.54285e-07		cell death	112	4.95575	0.000213625	0.56396		mRNA processing	87	3.58911	5.05746e-10	2.17673e-06		GO:0000785~chromatin	39	1.75281	0.000121687	0.0659923		GO:0008219~cell death	95	6.66667	2.12006e-06	0.00751269		GO:0005815~microtubule organizing center	35	2.16987	0.000398435	0.187489		GO:0034660~ncRNA metabolic process	69	3.53846	8.00257e-14	3.15626e-10		GO:0010876~lipid localization	23	1.81388	0.000421907	0.737226		GO:0010033~response to organic substance	38
cellular macromolecular complex assembly	92	3.62205	5.85433e-11	2.58703e-07		negative regulation of RNA metabolic process	64	2.83186	0.000218438	0.57204		nuclear mRNA splicing, via spliceosome	52	2.14521	6.32136e-10	2.72071e-06		GO:0019899~enzyme binding	87	3.91011	0.000122573	0.145946		hsa04110:Cell cycle	29	2.03509	2.47203e-06	0.000405332		GO:0006357~regulation of transcription from RNA polymerase II promoter	84	5.20769	0.000406831	0.748792		GO:0034621~cellular macromolecular complex subunit organization	92	4.71795	1.01817e-13	4.01427e-10		GO:0046907~intracellular transport	65	5.12618	0.000474615	0.777641		hsa00240:Pyrimidine metabolism	12
M phase	94	3.70079	7.48735e-11	3.30866e-07		negative regulation of cellular biosynthetic process	91	4.02655	0.0002291	0.589408		RNA splicing, via transesterification reactions with bulged adenosine as nucleophile	52	2.14521	6.32136e-10	2.72071e-06		Colon	171	7.68539	0.000125072	0.0451056		GO:0051094~positive regulation of developmental process	47	3.29825	2.55676e-06	0.00905318		GO:0005856~cytoskeleton	134	8.3075	0.000410956	0.192774		BP00203:Cell cycle	171	8.76923	2.36108e-13	5.05349e-11		GO:0017137~Rab GTPase binding	9	0.709779	0.000480068	0.380141		GO:0030532~small nuclear ribonucleoprotein complex	6
regulation of cellular protein metabolic process	123	4.84252	7.64876e-11	3.37999e-07		1q21	15	0.663717	0.000241611	0.229511		RNA splicing, via transesterification reactions	52	2.14521	6.32136e-10	2.72071e-06		IPR011993:Pleckstrin homology-type	56	2.51685	0.000136176	0.255654		GO:0016265~death	95	6.66667	2.84521e-06	0.0100694		GO:0003707~steroid hormone receptor activity	13	0.805952	0.000415704	0.357508		Lung	372	19.0769	3.10261e-13	1.05815e-10		GO:0014065~phosphoinositide 3-kinase cascade	5	0.394322	0.000499286	0.794361		GO:0051726~regulation of cell cycle	22
purine nucleotide binding	369	14.5276	8.01971e-11	1.2198e-07		microsome	44	1.9469	0.000258534	0.136367		Bone marrow	150	6.18812	9.32002e-10	3.42977e-07		GO:0000786~nucleosome	18	0.808989	0.000139371	0.0752139		GO:0007049~cell cycle	100	7.01754	3.34995e-06	0.0118451		GO:0032993~protein-DNA complex	17	1.05394	0.000436753	0.203555		Bone marrow	139	7.12821	4.66411e-13	1.59044e-10		GO:0044437~vacuolar part	13	1.02524	0.000516757	0.218513		GO:0007398~ectoderm development	16
endomembrane system	175	6.88976	9.69209e-11	6.35801e-08		Pleckstrin homology-type	56	2.47788	0.000274414	0.454166		envelope	137	5.65182	1.04578e-09	6.7139e-07		Skin fibroblast	11	0.494382	0.000145172	0.0521628		BP00207:Cell cycle control	58	4.07018	3.61229e-06	0.000725808		Uterus	175	10.8493	0.000466577	0.137114		GO:0000087~M phase of mitotic cell cycle	66	3.38462	7.37132e-13	2.90629e-09		GO:0006914~autophagy	10	0.788644	0.000522803	0.809128		GO:0043549~regulation of kinase activity	23
mRNA metabolic process	102	4.01575	1.02067e-10	4.51033e-07		epithelial tube morphogenesis	19	0.840708	0.000290105	0.676067		organelle envelope	136	5.61056	1.60918e-09	1.03309e-06		GO:0051253~negative regulation of RNA metabolic process	63	2.83146	0.000149968	0.437139		GO:0010033~response to organic substance	94	6.59649	4.2228e-06	0.0149083		GO:0030528~transcription regulator activity	158	9.79541	0.000473972	0.396148		GO:0000279~M phase	85	4.35897	8.44516e-13	3.33005e-09		IPR000494:EGF receptor, L domain	5	0.394322	0.000522853	0.546263		GO:0042127~regulation of cell proliferation	40
RNA splicing, via transesterification reactions	55	2.16535	1.26678e-10	5.5979e-07		phosphoinositide 3-kinase cascade	6	0.265487	0.000298776	0.686802		protein complex biogenesis	120	4.9505	1.63222e-09	7.02504e-06		Embryo	62	2.78652	0.000154067	0.0552689		IPR011700:Basic leucine zipper	9	0.631579	4.91333e-06	0.00871249		GO:0008134~transcription factor binding	64	3.96776	0.000544849	0.440033		GO:0034622~cellular macromolecular complex assembly	83	4.25641	9.00334e-13	3.5498e-09		IPR006211:Furin-like cysteine rich region	5	0.394322	0.000522853	0.546263		Colon carcinoma	14
RNA splicing, via transesterification reactions with bulged adenosine as nucleophile	55	2.16535	1.26678e-10	5.5979e-07		negative regulation of biosynthetic process	92	4.0708	0.000302544	0.691355		protein complex assembly	120	4.9505	1.63222e-09	7.02504e-06		GO:0008134~transcription factor binding	85	3.82022	0.000169395	0.195898		GO:0006366~transcription from RNA polymerase II promoter	41	2.87719	5.08053e-06	0.0179092		MF00093:Select regulatory molecule	113	7.00558	0.000578587	0.115979		GO:0007067~mitosis	65	3.33333	9.78554e-13	3.85842e-09		GO:0007242~intracellular signaling cascade	110	8.67508	0.000531361	0.814234		GO:0005829~cytosol	62
nuclear mRNA splicing, via spliceosome	55	2.16535	1.26678e-10	5.5979e-07		Embryo	62	2.74336	0.000304628	0.107424		Eye	195	8.04455	2.06263e-09	7.59046e-07		GO:0006333~chromatin assembly or disassembly	29	1.30337	0.000170369	0.479471		IPR000504:RNA recognition motif, RNP-1	37	2.59649	5.39854e-06	0.00956876		GO:0003714~transcription corepressor activity	25	1.54991	0.000589394	0.465968		GO:0000280~nuclear division	65	3.33333	9.78554e-13	3.85842e-09		GO:0010942~positive regulation of cell death	47	3.70662	0.000533449	0.815459		GO:0006270~DNA replication initiation	5
organelle fission	72	2.83465	1.60705e-10	7.10156e-07		Histone core	15	0.663717	0.00030569	0.490566		ribosome	62	2.55776	3.15538e-09	2.02576e-06		GO:0007167~enzyme linked receptor protein signaling pathway	60	2.69663	0.000175747	0.49009		GO:0045893~positive regulation of transcription, DNA-dependent	68	4.77193	6.1702e-06	0.0217084		GO:0004879~ligand-dependent nuclear receptor activity	14	0.867948	0.000609581	0.477323		hsa04110:Cell cycle	50	2.5641	9.92616e-13	1.74706e-10		BP00019:Lipid, fatty acid and steroid metabolism	69	5.44164	0.000557234	0.105987		hsa05130:Pathogenic Escherichia coli infection	9
macromolecular complex assembly	158	6.22047	1.83322e-10	8.10099e-07		response to steroid hormone stimulus	39	1.72566	0.000307072	0.696738		ATP binding	276	11.3861	3.61122e-09	5.36626e-06		GO:0001666~response to hypoxia	30	1.34831	0.000185028	0.50791		GO:0010608~posttranscriptional regulation of gene expression	38	2.66667	6.24041e-06	0.0219527		GO:0004861~cyclin-dependent protein kinase inhibitor activity	6	0.371978	0.000617039	0.481457		Keratinocyte	44	2.25641	1.13556e-12	3.87218e-10		IPR010911:Rab-binding domain	6	0.473186	0.000609142	0.601758		BP00178:Stress response	15
ATP binding	295	11.6142	1.97686e-10	3.00681e-07		cyclin-dependent protein kinase inhibitor activity	7	0.309735	0.000318788	0.341006		Lymph	137	5.65182	5.04613e-09	1.85697e-06		GO:0003707~steroid hormone receptor activity	16	0.719101	0.000188214	0.215143		hsa05222:Small cell lung cancer	22	1.54386	7.53057e-06	0.00123426		GO:0060562~epithelial tube morphogenesis	15	0.929944	0.000648226	0.889356		GO:0015935~small ribosomal subunit	31	1.58974	1.21649e-12	7.99222e-10		IPR011993:Pleckstrin homology-type	36	2.83912	0.000634768	0.616892		GO:0044452~nucleolar part	6
macromolecular complex subunit organization	165	6.49606	4.09326e-10	1.80881e-06		enzyme binding	87	3.84956	0.000356419	0.372668		nucleoside binding	296	12.2112	5.73157e-09	8.51708e-06		GO:0070482~response to oxygen levels	31	1.39326	0.00019861	0.532871		GO:0051254~positive regulation of RNA metabolic process	68	4.77193	8.18926e-06	0.0287092		Brain	693	42.9634	0.000656918	0.187512		Ovarian carcinoma	48	2.46154	1.38709e-12	4.73005e-10		GO:0010035~response to inorganic substance	27	2.12934	0.00064406	0.870023		GO:0001819~positive regulation of cytokine production	10
adenyl ribonucleotide binding	296	11.6535	5.68324e-10	8.64421e-07		cell part morphogenesis	48	2.12389	0.000397844	0.786887		cellular protein complex assembly	52	2.14521	5.86732e-09	2.52526e-05		Fetal kidney	38	1.70787	0.000214865	0.0762315		GO:0045637~regulation of myeloid cell differentiation	19	1.33333	8.20487e-06	0.0287631		GO:0007242~intracellular signaling cascade	131	8.12151	0.000729636	0.916091		GO:0006461~protein complex assembly	114	5.84615	1.43932e-12	5.67513e-09		GO:0070482~response to oxygen levels	21	1.65615	0.000646891	0.871184		BP00005:Glycolysis	7
mRNA processing	90	3.54331	5.70896e-10	2.52279e-06		cytoskeleton	184	8.14159	0.000418561	0.211304		purine nucleoside binding	294	12.1287	6.40639e-09	9.51984e-06		IPR007125:Histone core	15	0.674157	0.000229288	0.391741		GO:0051789~response to protein stimulus	24	1.68421	1.26829e-05	0.0441108		IPR013753:Ras	22	1.36392	0.000776394	0.743138		GO:0070271~protein complex biogenesis	114	5.84615	1.43932e-12	5.67513e-09		GO:0019903~protein phosphatase binding	10	0.788644	0.000686304	0.495301		GO:0010608~posttranscriptional regulation of gene expression	16
nucleoside binding	313	12.3228	1.29884e-09	1.97553e-06		response to reactive oxygen species	20	0.884956	0.000450139	0.826084		adenyl nucleotide binding	290	11.9637	7.29026e-09	1.08333e-05		GO:0030030~cell projection organization	63	2.83146	0.000240349	0.60193		GO:0006350~transcription	222	15.5789	1.35328e-05	0.0469963		GO:0006323~DNA packaging	21	1.30192	0.000826414	0.939604		GO:0005198~structural molecule activity	131	6.71795	1.98518e-12	2.63633e-09		Liver	171	13.4858	0.000707018	0.197449		GO:0032270~positive regulation of cellular protein metabolic process	17
Liver	365	14.3701	1.3775e-09	5.24827e-07		regulation of programmed cell death	122	5.39823	0.00047396	0.841464		regulation of cellular protein metabolic process	112	4.62046	8.45074e-09	3.63713e-05		GO:0048858~cell projection morphogenesis	46	2.06742	0.000243617	0.606885		Cajal-Retzius cell	33	2.31579	1.35604e-05	0.00426246		GO:0010605~negative regulation of macromolecule metabolic process	83	5.14569	0.000845158	0.943331		GO:0034470~ncRNA processing	58	2.97436	2.09349e-12	8.25486e-09		GO:0005496~steroid binding	13	1.02524	0.000711211	0.507676		GO:0051094~positive regulation of developmental process	19
adenyl nucleotide binding	307	12.0866	1.44167e-09	2.19278e-06		regulation of apoptosis	121	5.35398	0.000479623	0.844915		Liver	345	14.2327	8.47119e-09	3.11739e-06		GO:0014065~phosphoinositide 3-kinase cascade	6	0.269663	0.000253327	0.621248		GO:0000166~nucleotide binding	232	16.2807	1.36547e-05	0.0142487		GO:0048858~cell projection morphogenesis	35	2.16987	0.000941576	0.959163		Colon carcinoma	53	2.71795	2.58287e-12	8.80743e-10		GO:0031988~membrane-bounded vesicle	56	4.4164	0.000729478	0.293963		GO:0006261~DNA-dependent DNA replication	8
purine nucleoside binding	311	12.2441	1.4476e-09	2.2018e-06		non-membrane-bounded organelle	322	14.2478	0.000484694	0.240343		Other RNA-binding protein	52	2.14521	9.2273e-09	2.0946e-06		MF00003:Nuclear hormone receptor	15	0.674157	0.000268274	0.0575726		GO:0022402~cell cycle process	76	5.33333	1.3824e-05	0.0479829		IPR013069:BTB/POZ	22	1.36392	0.000959359	0.813567		GO:0051726~regulation of cell cycle	84	4.30769	3.2525e-12	1.28246e-08		GO:0043065~positive regulation of apoptosis	46	3.62776	0.000757796	0.909359		GO:0051338~regulation of transferase activity	23
RNA splicing	81	3.18898	1.91382e-09	8.45715e-06		intracellular non-membrane-bounded organelle	322	14.2478	0.000484694	0.240343		adenyl ribonucleotide binding	277	11.4274	9.27614e-09	1.37842e-05		GO:0005792~microsome	43	1.93258	0.000272547	0.141801		GO:0016071~mRNA metabolic process	55	3.85965	1.6623e-05	0.0574145		hsa04960:Aldosterone-regulated sodium reabsorption	11	0.681959	0.000988133	0.15887		GO:0005635~nuclear envelope	61	3.12821	4.52772e-12	2.97471e-09		GO:0007033~vacuole organization	10	0.788644	0.000781512	0.915923		GO:0032508~DNA duplex unwinding	5
Protein metabolism and modification	471	18.5433	1.91541e-09	4.15644e-07		vesicular fraction	44	1.9469	0.000491705	0.243358		RNA splicing	76	3.13531	1.27796e-08	5.50018e-05		IPR013088:Zinc finger, NHR/GATA-type	16	0.719101	0.000276981	0.451505		GO:0000278~mitotic cell cycle	55	3.85965	1.6623e-05	0.0574145		GO:0005819~spindle	23	1.42591	0.000991695	0.403651		hsa03030:DNA replication	24	1.23077	5.14533e-12	9.05578e-10		MF00123:Oxidoreductase	55	4.33754	0.000793892	0.145512		GO:0032392~DNA geometric change	5
positive regulation of cellular protein metabolic process	70	2.75591	2.58264e-09	1.14126e-05		response to insulin stimulus	24	1.06195	0.00054042	0.877556		mitochondrion organization	46	1.89769	1.37312e-08	5.90972e-05		IPR006211:Furin-like cysteine rich region	6	0.269663	0.000281944	0.457377		GO:0000079~regulation of cyclin-dependent protein kinase activity	16	1.12281	1.69312e-05	0.0584472		GO:0022403~cell cycle phase	52	3.22381	0.00102538	0.969283		GO:0048285~organelle fission	65	3.33333	6.96783e-12	2.74743e-08		GO:0032993~protein-DNA complex	15	1.18297	0.000816523	0.3227		GO:0032403~protein complex binding	15
positive regulation of protein metabolic process	72	2.83465	2.87648e-09	1.27111e-05		colon cancer	9	0.39823	0.000543689	0.539031		cell division	78	3.21782	1.42217e-08	6.12083e-05		IPR000494:EGF receptor, L domain	6	0.269663	0.000281944	0.457377		GO:0045944~positive regulation of transcription from RNA polymerase II promoter	55	3.85965	1.77679e-05	0.0612451		GO:0035091~phosphoinositide binding	19	1.17793	0.00102558	0.664379		GO:0016072~rRNA metabolic process	38	1.94872	7.50683e-12	2.95996e-08		GO:0005083~small GTPase regulator activity	33	2.60252	0.00082648	0.561113		GO:0051270~regulation of cell motion	15
Ovarian carcinoma	49	1.92913	3.07095e-09	1.17003e-06		regulation of cell death	122	5.39823	0.000553579	0.883661		M phase of mitotic cell cycle	64	2.64026	1.44784e-08	6.23133e-05		GO:0000302~response to reactive oxygen species	20	0.898876	0.000290694	0.67179		GO:0006357~regulation of transcription from RNA polymerase II promoter	92	6.45614	1.80954e-05	0.0623381		GO:0005545~phosphatidylinositol binding	7	0.433974	0.00109895	0.689609		Eye	175	8.97436	7.64323e-12	2.60634e-09		GO:0042625~ATPase activity, coupled to transmembrane movement of ions	14	1.1041	0.000826506	0.561125		GO:0006928~cell motion	27
cellular protein complex assembly	54	2.12598	4.20109e-09	1.85644e-05		primary neural tube formation	12	0.530973	0.000609874	0.906527		mitosis	63	2.59901	1.73225e-08	7.45534e-05		IPR001628:Zinc finger, nuclear hormone receptor-type	15	0.674157	0.000296483	0.474219		GO:0003700~transcription factor activity	115	8.07018	1.86875e-05	0.0194492		Eye	110	6.81959	0.00120361	0.316528		GO:0006364~rRNA processing	37	1.89744	8.53643e-12	3.3659e-08		GO:0051172~negative regulation of nitrogen compound metabolic process	53	4.17981	0.000843995	0.931029		GO:0048661~positive regulation of smooth muscle cell proliferation	6
Eye	201	7.91339	5.77602e-09	2.20066e-06		regulation of cyclin-dependent protein kinase activity	16	0.707965	0.000619596	0.909994		nuclear division	63	2.59901	1.73225e-08	7.45534e-05		GO:0032868~response to insulin stimulus	24	1.07865	0.000330589	0.718332		GO:0044451~nucleoplasm part	70	4.91228	2.11969e-05	0.0110668		GO:0042127~regulation of cell proliferation	87	5.39368	0.00124649	0.985513		Umbilical cord blood	75	3.84615	1.02691e-11	3.50177e-09		GO:0000302~response to reactive oxygen species	14	1.1041	0.000864509	0.935371		MF00119:Synthase	10
positive regulation of protein ubiquitination	35	1.37795	6.29167e-09	2.78025e-05		morphogenesis of an epithelium	24	1.06195	0.000627214	0.91262		Ovarian carcinoma	46	1.89769	1.81543e-08	6.68075e-06		GO:0005768~endosome	53	2.38202	0.00033836	0.172918		Muscle	93	6.52632	2.26722e-05	0.0071164		GO:0030030~cell projection organization	47	2.91383	0.00131385	0.988477		BP00048:mRNA splicing	54	2.76923	2.41706e-11	5.1725e-09		GO:0001666~response to hypoxia	20	1.57729	0.00087796	0.938068		GO:0051247~positive regulation of protein metabolic process	17
Other RNA-binding protein	54	2.12598	7.32598e-09	1.67765e-06		endosome	53	2.34513	0.000680865	0.320353		M phase	84	3.46535	2.10658e-08	9.06629e-05		IPR001723:Steroid hormone receptor	15	0.674157	0.000379864	0.561196		GO:0016564~transcription repressor activity	48	3.36842	2.53954e-05	0.0263379		GO:0030145~manganese ion binding	25	1.54991	0.00140573	0.776144		GO:0005681~spliceosome	45	2.30769	2.97674e-11	1.95572e-08		GO:0043068~positive regulation of programmed cell death	46	3.62776	0.000879903	0.938448		GO:0051240~positive regulation of multicellular organismal process	17
mitochondrion organization	48	1.88976	7.44268e-09	3.28887e-05		protein kinase cascade	63	2.78761	0.000684377	0.930032		Protein biosynthesis	96	3.9604	2.356e-08	5.06538e-06		colon cancer	9	0.404494	0.00042003	0.451841		GO:0003712~transcription cofactor activity	53	3.7193	2.75915e-05	0.0285826		GO:0003712~transcription cofactor activity	47	2.91383	0.00155241	0.808535		BP00060:Protein metabolism and modification	388	19.8974	3.90792e-11	8.36295e-09		GO:0031960~response to corticosteroid stimulus	15	1.18297	0.000938839	0.948937		GO:0051272~positive regulation of cell motion	10
protein complex assembly	122	4.80315	9.88962e-09	4.37013e-05		DNA binding	315	13.9381	0.000696574	0.598054		Chaperone	49	2.02145	2.50436e-08	5.68488e-06		GO:0004879~ligand-dependent nuclear receptor activity	17	0.764045	0.00043793	0.430923		hsa05200:Pathways in cancer	52	3.64912	2.88757e-05	0.00472448		GO:0060170~cilium membrane	5	0.309981	0.00156206	0.557126		GO:0005694~chromosome	103	5.28205	4.08217e-11	2.68199e-08		IPR002119:Histone H2A	7	0.55205	0.000949988	0.76215		GO:0002685~regulation of leukocyte migration	5
protein complex biogenesis	122	4.80315	9.88962e-09	4.37013e-05		chromatin assembly or disassembly	28	1.23894	0.000702528	0.934799		positive regulation of macromolecule metabolic process	176	7.26073	3.23029e-08	0.000139022		GO:0010605~negative regulation of macromolecule metabolic process	109	4.89888	0.000445501	0.818689		IPR004367:Cyclin, C-terminal	8	0.561404	3.43369e-05	0.0593226		GO:0016538~cyclin-dependent protein kinase regulator activity	7	0.433974	0.00158289	0.814653		BP00047:Pre-mRNA processing	66	3.38462	4.35356e-11	9.31662e-09		GO:0016023~cytoplasmic membrane-bounded vesicle	54	4.25868	0.00100933	0.382264		GO:0032103~positive regulation of response to external stimulus	8
Lymph	141	5.55118	1.13957e-08	4.34175e-06		phosphoinositide 3-kinase complex	7	0.309735	0.000713851	0.332955		response to protein stimulus	38	1.56766	4.69681e-08	0.00020213		BP00281:Oncogenesis	67	3.01124	0.000476681	0.0995808		Uterus	170	11.9298	3.62069e-05	0.0113406		GO:0030291~protein serine/threonine kinase inhibitor activity	7	0.433974	0.00158289	0.814653		GO:0051301~cell division	75	3.84615	4.88815e-11	1.9274e-07		MF00039:Other transcription factor	37	2.91798	0.00103567	0.18549		Muscle	36
Pre-mRNA processing	71	2.79528	1.53375e-08	3.32824e-06		Fetal kidney	37	1.63717	0.000716983	0.234733		organelle fission	63	2.59901	8.74753e-08	0.000376423		IPR000536:Nuclear hormone receptor, ligand-binding, core	15	0.674157	0.00048247	0.648747		IPR012677:Nucleotide-binding, alpha-beta plait	35	2.45614	4.08204e-05	0.0701226		GO:0051325~interphase	19	1.17793	0.0015925	0.995532		Mammary carcinoma	35	1.79487	4.96864e-11	1.69431e-08		Ovary	78	6.15142	0.00104369	0.277297		GO:0004540~ribonuclease activity	8
response to protein stimulus	40	1.5748	1.66781e-08	7.3698e-05		15q21.1	9	0.39823	0.000725548	0.543036		intracellular transport	140	5.77558	1.05397e-07	0.000453524		IPR008946:Nuclear hormone receptor, ligand-binding	15	0.674157	0.00048247	0.648747		GO:0045597~positive regulation of cell differentiation	38	2.66667	4.08418e-05	0.135217		GO:0005794~Golgi apparatus	88	5.45567	0.00160094	0.56602		GO:0005759~mitochondrial matrix	63	3.23077	5.12151e-11	3.36483e-08		GO:0045934~negative regulation of nucleobase, nucleoside, nucleotide and nucleic acid metabolic process	52	4.10095	0.00107542	0.966882		GO:0060429~epithelium development	16
mRNA processing factor	43	1.69291	2.40661e-08	5.51112e-06		neuron projection development	47	2.07965	0.000738283	0.943261		Pre-mRNA processing	66	2.72277	1.1924e-07	2.56362e-05		GO:0006334~nucleosome assembly	21	0.94382	0.000491578	0.848048		hsa04115:p53 signaling pathway	18	1.26316	5.59098e-05	0.00912755		GO:0001843~neural tube closure	9	0.557967	0.00183188	0.998021		GO:0031980~mitochondrial lumen	63	3.23077	5.12151e-11	3.36483e-08		GO:0016192~vesicle-mediated transport	57	4.49527	0.00111587	0.970868		GO:0002683~negative regulation of immune system process	9
regulation of protein ubiquitination	38	1.49606	2.43525e-08	0.000107608		enzyme linked receptor protein signaling pathway	59	2.61062	0.00074374	0.944452		unfolded protein binding	38	1.56766	2.09771e-07	0.000311671		GO:0042598~vesicular fraction	43	1.93258	0.000512079	0.249751		GO:0051726~regulation of cell cycle	49	3.4386	5.69093e-05	0.183258		GO:0060606~tube closure	9	0.557967	0.00183188	0.998021		Uterus	258	13.2308	5.82991e-11	1.988e-08		MF00126:Dehydrogenase	26	2.05047	0.00115608	0.2047		GO:0005198~structural molecule activity	32
ribosome	62	2.44094	2.70378e-08	1.77367e-05		tube lumen formation	14	0.619469	0.000743863	0.944478		structural constituent of ribosome	49	2.02145	2.1932e-07	0.000325857		Liver	276	12.4045	0.00052519	0.176215		GO:0005643~nuclear pore	18	1.26316	6.42614e-05	0.0331755		GO:0007276~gamete generation	49	3.03782	0.00191307	0.998498		GO:0006974~response to DNA damage stimulus	88	4.51282	6.22235e-11	2.45347e-07		Trachea	42	3.3123	0.00119116	0.30973		GO:0045859~regulation of protein kinase activity	21
Chaperone	50	1.9685	5.05313e-08	1.15716e-05		Protein of unknown function DUF580	5	0.221239	0.000749653	0.808785		regulation of cyclin-dependent protein kinase activity	24	0.990099	2.29082e-07	0.000985483		IPR004182:GRAM	9	0.404494	0.00053278	0.685061		GO:0006399~tRNA metabolic process	24	1.68421	6.55388e-05	0.207949		BP00044:mRNA transcription regulation	135	8.3695	0.00192491	0.334054		hsa03040:Spliceosome	47	2.41026	9.17162e-11	1.6142e-08		GO:0006333~chromatin assembly or disassembly	19	1.49842	0.00119249	0.977152		GO:0043085~positive regulation of catalytic activity	28
Platelet	119	4.68504	6.28883e-08	2.39601e-05		response to hypoxia	29	1.28319	0.000753494	0.946519		protein targeting	59	2.43399	2.58629e-07	0.00111252		GO:0065004~protein-DNA complex assembly	22	0.988764	0.000562628	0.884282		GO:0051174~regulation of phosphorus metabolic process	65	4.5614	6.98248e-05	0.219933		GO:0035148~tube lumen formation	11	0.681959	0.00193016	0.998583		GO:0044445~cytosolic part	48	2.46154	1.21062e-10	7.95375e-08		GO:0010605~negative regulation of macromolecule metabolic process	69	5.44164	0.00121166	0.978499		GO:0008544~epidermis development	14
regulation of cyclin-dependent protein kinase activity	25	0.984252	1.28444e-07	0.000567432		response to oxygen levels	30	1.32743	0.000800321	0.955421		tRNA metabolic process	39	1.60891	2.59863e-07	0.00111783		MF00101:Guanyl-nucleotide exchange factor	28	1.25843	0.00057786	0.119921		GO:0019220~regulation of phosphate metabolic process	65	4.5614	6.98248e-05	0.219933		8q22	5	0.309981	0.00198687	0.822416		GO:0005643~nuclear pore	32	1.64103	2.45055e-10	1.61001e-07		Prostate	58	4.57413	0.00124929	0.322111		IPR012340:Nucleic acid-binding, OB-fold	7
regulation of ligase activity	32	1.25984	1.3443e-07	0.000593871		phosphoinositide binding	24	1.06195	0.00081102	0.653975		DNA replication	54	2.22772	2.66402e-07	0.00114594		GO:0060562~epithelial tube morphogenesis	18	0.808989	0.000584274	0.893498		GO:0046930~pore complex	20	1.40351	7.06089e-05	0.0363923		GO:0032990~cell part morphogenesis	35	2.16987	0.0020068	0.998908		GO:0012505~endomembrane system	150	7.69231	2.55992e-10	1.68186e-07		GO:0033559~unsaturated fatty acid metabolic process	11	0.867508	0.00126873	0.982058		hsa04512:ECM-receptor interaction	10
cell proliferation	105	4.13386	1.398e-07	0.000617586		steroid hormone receptor activity	15	0.663717	0.000915807	0.698331		Protein folding	46	1.89769	2.91533e-07	6.26776e-05		GO:0033554~cellular response to stress	87	3.91011	0.000625096	0.908929		GO:0003690~double-stranded DNA binding	21	1.47368	7.09823e-05	0.0718901		GO:0048471~perinuclear region of cytoplasm	36	2.23187	0.00206082	0.658632		GO:0022627~cytosolic small ribosomal subunit	22	1.12821	2.91789e-10	1.91706e-07		MF00063:Histone	10	0.788644	0.00130656	0.228075		MF00243:DNA helicase	8
programmed cell death	137	5.3937	1.45851e-07	0.000644306		Guanyl-nucleotide exchange factor	28	1.23894	0.000921117	0.183509		programmed cell death	130	5.36304	3.49046e-07	0.00150116		GO:0032990~cell part morphogenesis	46	2.06742	0.00065586	0.919063		IPR011616:bZIP transcription factor, bZIP-1	11	0.77193	7.24472e-05	0.121055		GO:0044430~cytoskeletal part	94	5.82765	0.0020656	0.659482		GO:0017076~purine nucleotide binding	298	15.2821	2.98525e-10	3.96441e-07		GO:0045892~negative regulation of transcription, DNA-dependent	39	3.07571	0.00132798	0.985131		GO:0052547~regulation of peptidase activity	9
Keratinocyte	41	1.61417	1.55896e-07	5.93944e-05		Interferon-mediated immunity	17	0.752212	0.000930605	0.185971		interphase	36	1.48515	3.88881e-07	0.00167234		BP00040:mRNA transcription	230	10.3371	0.000666742	0.136475		GO:0045859~regulation of protein kinase activity	50	3.50877	8.14081e-05	0.251422		GO:0032868~response to insulin stimulus	18	1.11593	0.00209485	0.999191		GO:0015934~large ribosomal subunit	29	1.48718	3.18991e-10	2.09577e-07		GO:0030136~clathrin-coated vesicle	19	1.49842	0.00138477	0.483663		IPR001763:Rhodanese-like	5
regulation of apoptosis	171	6.73228	1.57782e-07	0.000696994		transmembrane receptor protein tyrosine kinase signaling pathway	42	1.85841	0.000963032	0.976321		endoplasmic reticulum	181	7.467	4.27408e-07	0.000274359		GO:0043627~response to estrogen stimulus	24	1.07865	0.000690084	0.929017		Lymph	77	5.40351	8.49929e-05	0.0264186		IPR001806:Ras GTPase	22	1.36392	0.00210874	0.975132		GO:0019866~organelle inner membrane	79	4.05128	3.30319e-10	2.17019e-07		GO:0007584~response to nutrient	20	1.57729	0.00149341	0.991201		BP00035:DNA replication	11
[truncated: 28 more columns]
